# Supplementary material
Source: PubMed Central journal article supplement (PMC6541325)
Supplement: ja8b13899_si_001.pdf [file ja8b13899_si_001.pdf]

## Supporting Information

# Strong and Confined Acids Enable a Catalytic Asymmetric Nazarov Cyclization of Simple Divinyl Ketones

Jie Ouyang, Jennifer L. Kennemur, Chandra Kanta De, Christophe Farès and Benjamin List\*

Max-Planck-Institut für Kohlenforschung, Kaiser-Wilhelm-Platz 1, 45470 Mülheim an der Ruhr, Germany

|                                                                                     |    |
|-------------------------------------------------------------------------------------|----|
| General information.....                                                            | 2  |
| Synthesis & characterization of catalyst ( <b>4e</b> , <b>4f</b> , <b>4g</b> )..... | 3  |
| Kinetic study via <sup>1</sup> H NMR .....                                          | 8  |
| Limitations of the method.....                                                      | 9  |
| Synthesis & characterization of substrates .....                                    | 15 |
| Preparation of racemate of Nazarov products .....                                   | 22 |
| General procedure of the asymmetric Nazarov cyclization .....                       | 22 |
| Characterization of enones products .....                                           | 23 |
| Determination of absolute configuration of enone <b>2n</b> .....                    | 33 |
| Functionalization of <b>2a</b> .....                                                | 40 |
| References .....                                                                    | 45 |
| NMR Spectra.....                                                                    | 46 |
| HPLC and GC Traces.....                                                             | 90 |

## General information

Unless otherwise stated, all reagents were purchased from commercial suppliers and used without further purification. Aldehydes were distilled and stored under Ar prior to use. All solvents used in the reactions were distilled from appropriate drying agents prior to use. Reactions were monitored by thin layer chromatography (TLC) on silica gel pre-coated plastic sheets (0.2 mm, Macherey-Nagel) or glass plates (SIL G-25 UV254, 0.25 mm, Macherey-Nagel). Visualization was accomplished by irradiation with UV light at 254 nm and/or *p*-anisaldehyde (PAA) stain. PAA stain: to absolute EtOH (135 mL) was added conc. sulfuric acid (5 mL), glacial acetic acid (1.5 mL) and *p*-anisaldehyde (3.7 mL). Column chromatography was performed on Merck silica gel (60, particle size 0.040–0.063 mm). NMR spectra were recorded on Bruker AV-500, Bruker AV-400 or Bruker AV-300 spectrometer in deuterated solvents. Proton chemical shifts are reported in ppm ( $\delta$ ) relative to tetramethylsilane (TMS) with the solvent resonance employed as the internal standard ( $\text{CDCl}_3$   $\delta$  7.26 ppm;  $\text{CD}_2\text{Cl}_2$   $\delta$  5.32 ppm). Data are reported as follows: chemical shift, multiplicity (s = singlet, d = doublet, t = triplet, q = quartet, p = pentet, sext = sextet, h = heptet, m = multiplet, br = broad), coupling constants (Hz) and integration.  $^{13}\text{C}$  chemical shifts are reported in ppm from tetramethylsilane (TMS) with the solvent resonance as the internal standard ( $\text{CDCl}_3$   $\delta$  77.16 ppm;  $\text{CD}_2\text{Cl}_2$   $\delta$  53.84 ppm). High resolution mass spectra were determined on a Bruker APEX III FTMS (7 T magnet). All reported yields, unless otherwise specified, refer to spectroscopically and chromatographically pure compounds. Optical rotations were determined with Autopol IV polarimeter (Rudolph Research Analytical) at 589 nm and 25 °C. Data are reported as follows:  $[\alpha]_{\lambda}^{\text{temp}}$ , concentration (*c*; g/100 mL), and solvents. Enantiomeric ratios (e.r.) were determined by GC or HPLC analysis employing a chiral stationary phase column specified in the individual experiment, by comparing the samples with the appropriate racemic mixtures. Diastereomeric ratios (d.r.) were determined by  $^1\text{H}$  NMR spectra of the crude reaction mixtures.

## Synthesis & Characterization of Catalysts

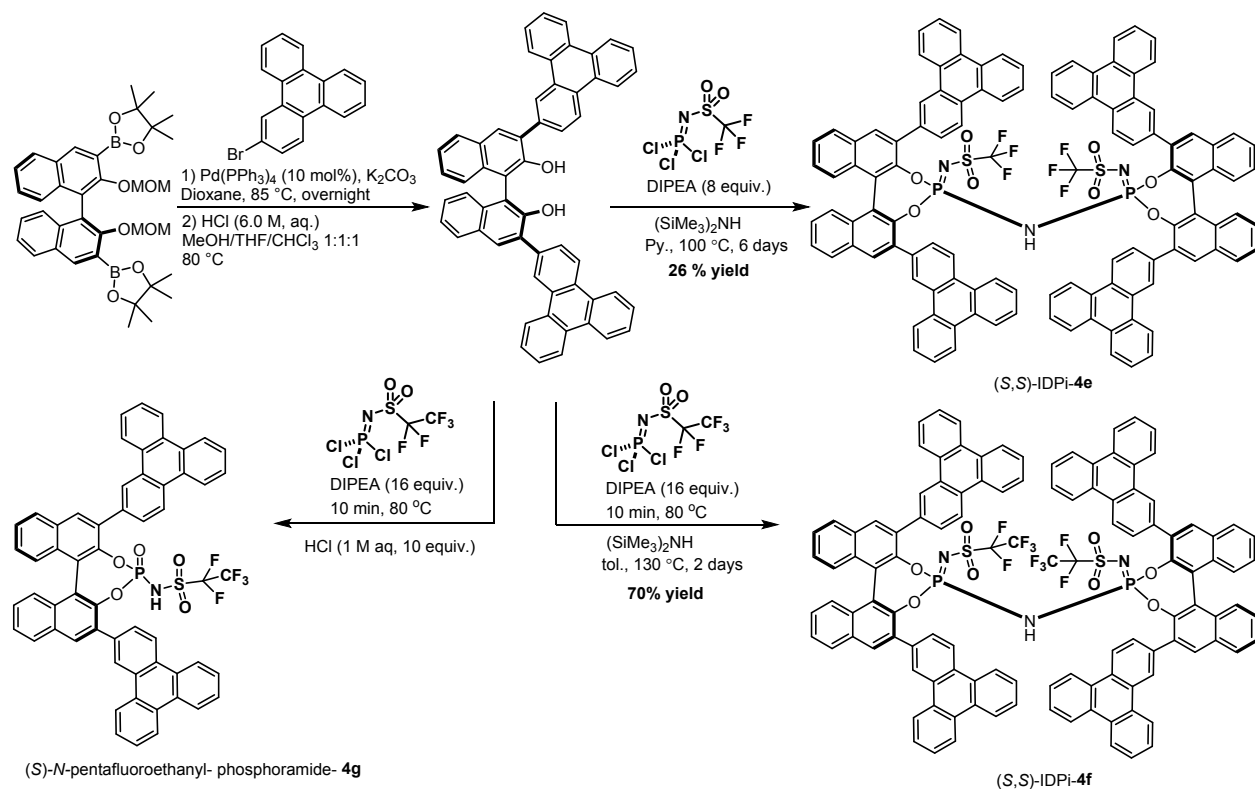

**Scheme 1.** Preparation of catalyst **4e**, **4f**, **4g**

### (S)-3,3'-di(triphenylen-2-yl)-[1,1'-binaphthalene]-2,2'-diol

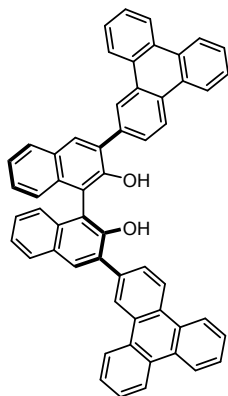

To a flame dried two-neck round-bottom flask with a condenser was added (S)-2,2'-(2,2'-bis(methoxymethoxy)-1,1'-binaphthyl-3,3'-diyl)bis(4,4,5,5-tetramethyl-1,3,2-dioxaborolane) (2.0 g, 3.2 mmol, 1.0 equiv), 2-bromotriphenylene (2.3 g, 7.3 mmol, 2.3 equiv) and tetrakis(triphenylphosphine)palladium (0.37 g, 0.32 mmol, 0.1 equiv). After degassing the reaction mixture with argon for 20 min, 1,4-dioxane (25 ml) and a degassed solution of K<sub>2</sub>CO<sub>3</sub> (2.0 M, aq., 15 mL) were sequentially added. The mixture was then heated to 85 °C and stirred at that temperature overnight. After cooling the reaction to room temperature, the product precipitated and was filtered using a Büchner funnel, washing with hexane three times. The compound was further purified by column chromatography to afford (S)-2,2'-(2,2'-bis(methoxymethoxy)-[1,1'-binaphthalene]-3,3'-diyl)diphenylene (2.2 g, 3.0 mmol, 93%) as a white solid. Subsequently, the solid was dissolved in chloroform (20 mL), MeOH (50 mL) and

THF (50 mL) and a solution of HCl (6 M. aq., 20 mL) was added at room temperature. This mixture was heated to 80 °C and stirred overnight until the starting material was consumed (as monitored by TLC analysis). The reaction was then cooled to room temperature and quenched with water (100 mL). The resulting mixture was extracted with DCM (2 x 100 mL) and dried over anhydrous MgSO<sub>4</sub>. Following filtration of the suspension through Celite, the volatiles were removed under reduced pressure. The resulting residue was purified by column chromatography (EtOAc: isohexane = 1:5) to afford (*S*)-3,3'-di(triphenylen-2-yl)-[1,1'-binaphthalene]-2,2'-diol (1.9 g, 2.57 mmol, 85%) as a light yellow solid.

<sup>1</sup>H NMR (500 MHz, CD<sub>2</sub>Cl<sub>2</sub>) δ 9.08 (d, *J* = 1.7 Hz, 2H), 8.81–8.76 (m, 4H), 8.72 (ddd, *J* = 9.5, 7.5, 3.2 Hz, 6H), 8.28 (s, 2H), 8.09 (dd, *J* = 8.5, 1.8 Hz, 2H), 8.05 (dd, *J* = 8.2, 1.2 Hz, 2H), 7.70 (m, *J* = 8H), 7.47 (ddd, *J* = 8.1, 6.7, 1.3 Hz, 2H), 7.41 (ddd, *J* = 8.3, 6.8, 1.4 Hz, 2H), 7.34 (dd, *J* = 8.4, 1.1 Hz, 2H), 5.69 (s, 2H).

<sup>13</sup>C NMR (125 MHz, CD<sub>2</sub>Cl<sub>2</sub>) δ 151.0, 136.9, 133.7, 132.2, 131.0, 130.4, 130.3, 130.2, 130.1, 129.9, 129.5, 129.2, 129.0, 127.9, 127.8, 127.8, 124.9, 124.8, 124.7, 123.8, 123.8, 123.8, 113.1. (The missing carbon singlets were due to overlap.)

HRMS (ESI<sup>-</sup>) (*m/z*): calculated for C<sub>56</sub>H<sub>33</sub>O<sub>2</sub> [M-H]<sup>-</sup>: 737.2486; found 737.2497.

#### Imidodiphosphorimidates (IDPi, **4e**)

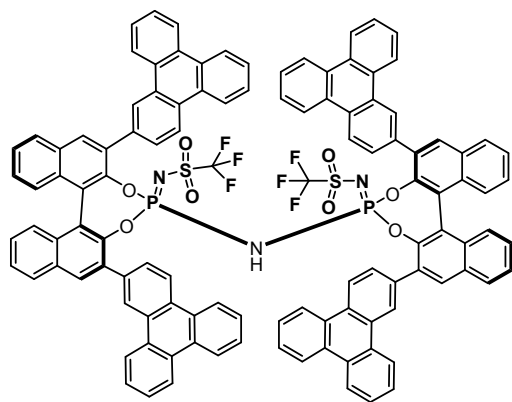

In a flame dried Schlenk flask under Ar, *N*-Tf trichlorophosphazene (69.4 mg, 0.244 mmol, 2.03 equiv.) was dissolved in pyridine (2.5 mL), the corresponding diol (182.2 mg, 0.247 mmol, 2.05 equiv.) and then *N,N*-diisopropylethylamine (0.168 mL, 0.962 mmol, 8.0 equiv.) was added. The mixture was stirred at room temperature for 20 minutes and then hexamethyldisilazane (25.1 μL, 0.120 mmol, 1.0 equiv.)

was added. After being stirred at room temperature for 15 minutes, the mixture was heated to 100 °C for 6 d. The reaction mixture was cooled to room temperature and all the volatiles were removed *in vacuo*. To the residue was added DCM and HCl (1M, aq). The two phases were separated and the aqueous layer was washed with DCM twice. The combined organic layer was

dried with Na<sub>2</sub>SO<sub>4</sub>, filtered and concentrated *in vacuo*. Purification by silica gel column chromatography (eluant: 20% ethyl acetate in hexane then 7:3:1 hexane-MTBE-DCM) followed by acidification in DCM with HCl (6 M, aq) and dried *in vacuo* afforded the desired compound **4e** as a yellowish solid (58.0 mg, 26%).

**<sup>1</sup>H NMR** (500 MHz, CD<sub>2</sub>Cl<sub>2</sub>) δ 8.95 (d, *J* = 1.7 Hz, 2H), 8.78 (dd, *J* = 8.4, 4.8 Hz, 4H), 8.61 – 8.56 (m, 2H), 8.50 – 8.40 (m, 10H), 8.19 (dd, *J* = 8.4, 1.4 Hz, 2H), 8.11–8.06 (m, 4H), 8.06 – 8.00 (m, 6H), 8.00 – 7.91 (m, 4H), 7.82 (ddd, *J* = 8.4, 7.0, 1.1 Hz, 2H), 7.74 (d, *J* = 8.5 Hz, 2H), 7.72 – 7.66 (m, 6H), 7.63 (d, *J* = 8.6 Hz, 6H), 7.58 – 7.41 (m, 16H), 6.58 (d, *J* = 8.7 Hz, 2H), 6.15 (dd, *J* = 8.5, 1.8 Hz, 2H), 5.69 (d, *J* = 8.5 Hz, 2H).

**<sup>13</sup>C NMR** (125 MHz, CD<sub>2</sub>Cl<sub>2</sub>) δ 143.5, 143.1, 134.6, 132.3, 132.3, 132.1, 131.7, 131.6, 130.2, 129.9, 129.7, 129.4, 129.4, 129.3, 129.3, 129.3, 129.2, 129.1, 129.1, 128.8, 128.5, 128.0, 127.7, 127.6, 127.4, 127.3, 127.2, 127.2, 127.04, 126.8, 126.8, 126.8, 126.6, 126.4, 124.9, 124.4, 123.7, 123.6, 123.4, 123.4, 123.3, 123.2, 123.2, 122.9, 122.8, 122.80, 122.4, 122.0.

**<sup>19</sup>F NMR** (470 MHz, CD<sub>2</sub>Cl<sub>2</sub>) δ -79.31.

**<sup>31</sup>P NMR** (202 MHz, CD<sub>2</sub>Cl<sub>2</sub>) δ -14.50.

**HRMS** (ESI<sup>-</sup>) (*m/z*): calculated for C<sub>114</sub>H<sub>64</sub>F<sub>6</sub>N<sub>3</sub>O<sub>8</sub>P<sub>2</sub>S<sub>2</sub> [M-H]<sup>-</sup>: 1842.3520; found 1842.3538.

#### Imidodiphosphorimidates (IDPi, **4f**)

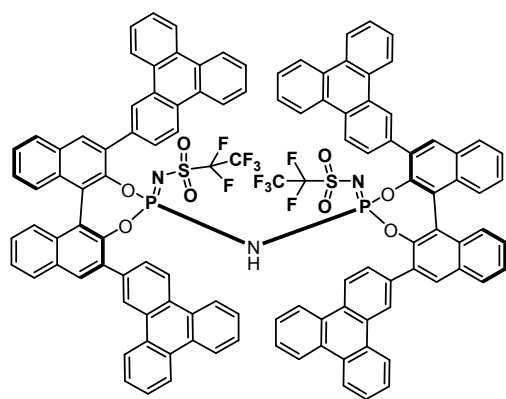

In a flame-dried J. Young Schlenk flask under Ar, dry diol (114 mg, 0.15 mmol, 2.1 equiv) was dissolved in toluene (3 mL). Subsequently, *N,N*-diisopropylethylamine (DIPEA, 151 mg, 1.16 mmol, 16.0 equiv) and ((perfluoroethyl)sulfonyl)phosphorimidoyl trichloride, P(NSO<sub>2</sub>C<sub>2</sub>F<sub>5</sub>)Cl<sub>3</sub><sup>1</sup> (51 mg, 0.15 mmol, 2.1 equiv) were sequentially added at 80 °C. After stirring the solution for 15 min, 1,1,1,3,3,3-hexamethyldisilazane (HMDS, 12 mg, 0.073 mmol, 1.0 equiv) was added under Ar. The mixture was stirred at 80 °C for 10 min, and then heated to 130 °C for 2 days. The reaction mixture was cooled to room temperature, diluted with DCM (15 mL), and stirred with HCl (1.0 M, aq., 3 mL) for 30 min. The organic phase was then separated, and the aqueous layer was extracted with DCM (2 x 10 mL). All combined organic layers were dried over anhydrous MgSO<sub>4</sub>. The suspension was filtered and

the organic solvent was concentrated under reduced pressure. The residue was purified by column chromatography on silica gel (EtOAc: isohexane = 1:4) to give a colorless solid, which was then acidified in DCM (5 mL) with HCl (6.0 M, aq., 6 mL) by stirring at room temperature for 15 min. The mixture was diluted with DCM (10 mL), and the organic layer was separated, and washed with HCl (6.0 M, aq., 2 x 20 mL), followed by drying under reduced pressure to provide compound **4e** as a light yellow solid (98 mg, 0.051 mmol, 70%)

**<sup>1</sup>H NMR** (500 MHz, CD<sub>2</sub>Cl<sub>2</sub>) δ 8.81 (d, *J* = 1.8 Hz, 2H), 8.63 (d, *J* = 8.3 Hz, 2H), 8.59 (d, *J* = 8.4 Hz, 2H), 8.41 (dd, *J* = 8.1, 1.6 Hz, 2H), 8.38–8.29 (m, 8H), 8.28–8.20 (m, 2H), 8.10 (dd, *J* = 8.0, 1.7 Hz, 2H), 7.99 (dd, *J* = 8.6, 1.3 Hz, 2H), 7.96–7.85 (m, 6H), 7.81 (ddd, *J* = 8.3, 6.8, 1.3 Hz, 2H), 7.79–7.71 (m, 6H), 7.62–7.54 (m, 6H), 7.51 (d, *J* = 8.2 Hz, 2H), 7.42 (tdd, *J* = 8.3, 3.7, 1.3 Hz, 4H), 7.39–7.25 (m, 10H), 6.46 (d, *J* = 8.8 Hz, 2H), 6.06 (dd, *J* = 8.6, 1.8 Hz, 2H), 5.71 (dd, *J* = 8.5, 1.8 Hz, 2H).

**<sup>13</sup>C NMR** (125 MHz, CD<sub>2</sub>Cl<sub>2</sub>) δ 143.8, 143.8, 143.8, 143.7, 134.9, 134.2, 134.1, 134.0, 132.7, 132.7, 132.6, 132.4, 132.2, 132.2, 130.6, 130.4, 130.1, 129.9, 129.9, 129.8, 129.7, 129.7, 129.5, 129.3, 129.1, 128.4, 128.3, 128.0, 127.9, 127.8, 127.6, 127.5, 127.3, 127.3, 127.3, 127.2, 127.1, 126.8, 125.2, 124.6, 124.2, 123.9, 123.8, 123.7, 123.6, 123.3, 123.3, 123.2, 122.7, 122.3.

**<sup>19</sup>F NMR** (470 MHz, CD<sub>2</sub>Cl<sub>2</sub>): δ -79.15, -116.54, -116.61

**<sup>31</sup>P NMR** (202 MHz, CD<sub>2</sub>Cl<sub>2</sub>): δ -15.60

**HRMS** (ESI<sup>-</sup>) (*m/z*): calculated for C<sub>116</sub>H<sub>64</sub>F<sub>10</sub>N<sub>3</sub>O<sub>8</sub>P<sub>2</sub>S<sub>2</sub> [M-H]<sup>-</sup>: 1942.3456; found 1942.3466.

#### (*S*)-*N*-pentafluoroethyl- phosphoramidate- **4g**

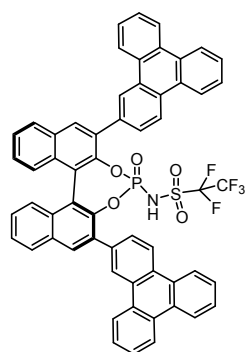

In a flame-dried J. Young Schlenk flask under Ar, dry diol (50 mg, 0.07 mmol, 1 equiv) was dissolved in toluene (3 mL). Subsequently, *N,N*-diisopropylethylamine (DIPEA, 67 mg, 0.52 mmol, 7 equiv) and ((perfluoroethyl)sulfonyl)phosphorimidoyl trichloride, P(NSO<sub>2</sub>C<sub>2</sub>F<sub>5</sub>)Cl<sub>3</sub><sup>1</sup> (23 mg, 0.07 mmol, 1 equiv) were sequentially added at 80 °C. After stirring the solution for 30 min, HCl (1 M, aq, 10 equiv) was added under Ar. The mixture was stirred at 80 °C for 10 min, and then diluted with DCM (15 mL)

and water (10 mL). The organic phase was separated, and the aqueous layer was extracted with DCM (2 x 10 mL). All combined organic layers were dried over anhydrous MgSO<sub>4</sub>. The suspension was filtered, and the organic solvent was concentrated under reduced pressure. The

residue was purified by column chromatography on silica gel (EtOAc: isohexane = 1:4 to 1:1) to give a colorless solid, which was then acidified in DCM (5 mL) with HCl (6.0 M, aq., 6 mL) by stirring at room temperature for 15 min. The mixture was diluted with DCM (10 mL), and the organic layer was separated, and washed with HCl (6.0 M, aq., 2 x 20 mL), followed by drying under reduced pressure to provide compound **4g** as a light yellow solid (30 mg, 0.03 mmol, 46%).

**<sup>1</sup>H NMR** (500 MHz, CD<sub>2</sub>Cl<sub>2</sub>) δ 8.92 (d, *J* = 1.9 Hz, 1H), 8.73 (t, *J* = 8.0 Hz, 3H), 8.57 (d, *J* = 8.0 Hz, 1H), 8.52 (dq, *J* = 8.6, 1.7 Hz, 3H), 8.40 (dd, *J* = 15.5, 8.2 Hz, 2H), 8.32 (s, 1H), 8.26 (d, *J* = 7.3 Hz, 2H), 8.12 – 8.03 (m, 3H), 7.93 (dd, *J* = 8.5, 1.8 Hz, 1H), 7.64 (ddd, *J* = 8.3, 6.2, 1.8 Hz, 1H), 7.58 – 7.39 (m, 10H), 7.34 – 7.26 (m, 3H), 7.22 (s, 2H).

**<sup>13</sup>C NMR** (125 MHz, CD<sub>2</sub>Cl<sub>2</sub>) δ 134.8, 134.6, 133.6, 132.4, 132.2, 132.0, 131.9, 130.1, 129.8, 129.7, 129.5, 129.39, 129.1, 128.9, 128.7, 128.7, 127.4, 127.2, 127.2, 127.1, 127.1, 127.0, 126.9, 126.7, 126.6, 125.5, 123.6, 123.5, 123.43, 123.4, 123.1, 122.9, 122.8, 66.8.

**<sup>19</sup>F NMR** (470 MHz, CD<sub>2</sub>Cl<sub>2</sub>) δ -79.53, -115.85.

**<sup>31</sup>P NMR** (202 MHz, CD<sub>2</sub>Cl<sub>2</sub>) δ -5.29.

**HRMS** (ESI<sup>-</sup>) (*m/z*): calculated for C<sub>58</sub>H<sub>32</sub>N<sub>1</sub>O<sub>5</sub>P<sub>1</sub>S<sub>1</sub>F<sub>5</sub> [M-H]<sup>-</sup>: 980.1665; found 980.1656.

**Table S1. Selected optimization experiments in the reaction of divinyl ketone 1a.**

1a  $\xrightarrow{\text{conditions}}$  2a + 3a

---

(*S,S*)-IDP-**4a**: Ar = Ph, R = O  
(*S,S*)-iDP-**4b**: Ar = Ph, R = NTf

(*S,S*)-IDPi-**4c**: Ar = phenyl, R = SO<sub>2</sub>CF<sub>3</sub>  
(*S,S*)-IDPi-**4e**: Ar = 2-triphenylenyl, R = SO<sub>2</sub>CF<sub>3</sub>  
(*S,S*)-IDPi-**4f**: Ar = 2-triphenylenyl, R = SO<sub>2</sub>C<sub>2</sub>F<sub>5</sub>

(*S*)-**4c**: Ar = 9-phenanthryl, R = CF<sub>3</sub>  
(*S*)-**4g**: Ar = 2-triphenylenyl, R = C<sub>2</sub>F<sub>5</sub>

9-phenanthryl      2-triphenylenyl

| Entry | Catalysts                 | Loading | Sol.              | T/°C | Time  | Additive | Conc./M | Conv. <sup>b</sup> | r.r. <sup>b</sup> | e.r. <sub>2a</sub> <sup>c</sup> | e.r. <sub>3a</sub> <sup>c</sup> |
|-------|---------------------------|---------|-------------------|------|-------|----------|---------|--------------------|-------------------|---------------------------------|---------------------------------|
| 1     | ( <i>S</i> )- <b>4a</b>   | 5 mol%  | Tol.              | 25   | 16 h  | 4 Å MS   | 0.05    | N.R.               | N.D.              | N.D.                            | N.D.                            |
| 2     | ( <i>S</i> )- <b>4b</b>   | 5 mol%  | Tol.              | 25   | 16 h  | 4 Å MS   | 0.05    | N.R.               | N.D.              | N.D.                            | N.D.                            |
| 3     | ( <i>S</i> )- <b>4c</b>   | 5 mol%  | CHCl <sub>3</sub> | 25   | 16 h  | /        | 0.2     | 75%                | 1:2               | 52:48                           | 61:39                           |
| 4     | ( <i>S</i> )- <b>4c</b>   | 5 mol%  | Tol.              | 25   | 16 h  | 4 Å MS   | 0.05    | 13%                | 1.7:1             | 56:44                           | 67:33                           |
| 5     | ( <i>S</i> )- <b>4g</b>   | 5 mol%  | Tol.              | 25   | 16 h  | 4 Å MS   | 0.05    | 51%                | 1.9:1             | 51:49                           | 84:16                           |
| 6     | ( <i>S,S</i> )- <b>4d</b> | 5 mol%  | Tol.              | 25   | 16 h  | 4 Å MS   | 0.05    | N.R.               | N.D.              | N.D.                            | N.D.                            |
| 7     | ( <i>S,S</i> )- <b>4e</b> | 5 mol%  | Tol.              | 25   | 16 h  | 4 Å MS   | 0.05    | 70%                | >20:1             | 81:19                           | N.D.                            |
| 8     | ( <i>S,S</i> )- <b>4f</b> | 5 mol%  | Tol.              | 25   | 16 h  | 4 Å MS   | 0.05    | full               | >20:1             | 86:14                           | N.D.                            |
| 9     | ( <i>S,S</i> )- <b>4f</b> | 2 mol%  | Tol.              | 25   | 29 h  | 4 Å MS   | 0.05    | 85%                | >20:1             | 86:14                           | N.D.                            |
| 10    | ( <i>S,S</i> )- <b>4f</b> | 10 mol% | Tol.              | 25   | 7 h   | 4 Å MS   | 0.05    | full               | >20:1             | 86:14                           | N.D.                            |
| 11    | ( <i>S,S</i> )- <b>4f</b> | 5 mol%  | Tol.              | 25   | 16 h  | /        | 0.2     | full               | 11:1              | 84:16                           | 90:10                           |
| 12    | ( <i>S,S</i> )- <b>4f</b> | 5 mol%  | Et <sub>2</sub> O | 25   | 16 h  | /        | 0.2     | N.R.               | N.D.              | N.D.                            | N.D.                            |
| 13    | ( <i>S,S</i> )- <b>4f</b> | 5 mol%  | CHCl <sub>3</sub> | 25   | 16 h  | /        | 0.2     | 62%                | 14:1              | 74:26                           | 86:14                           |
| 14    | ( <i>S,S</i> )- <b>4f</b> | 5 mol%  | Tol.              | 0    | 4 d   | /        | 0.2     | full               | 14:1              | 91:9                            | 97:3                            |
| 15    | ( <i>S,S</i> )- <b>4f</b> | 5 mol%  | Tol.              | -20  | 4 d   | /        | 0.2     | 78%                | 20:1              | 96:4                            | 98:2                            |
| 16    | ( <i>S,S</i> )- <b>4f</b> | 5 mol%  | Tol.              | -40  | 4 d   | /        | 0.2     | N.R.               | N.D.              | N.D.                            | N.D.                            |
| 17    | ( <i>S,S</i> )- <b>4f</b> | 5 mol%  | Tol.              | -20  | 3.5 d | 4 Å MS   | 0.05    | full               | >20:1             | 97:3                            | N.D.                            |
| 18    | ( <i>S,S</i> )- <b>4f</b> | 10 mol% | Tol.              | -20  | 29 h  | 4 Å MS   | 0.05    | 86%                | >20:1             | 97:3                            | N.D.                            |

a) Unless otherwise indicated, the reactions were performed with **1a** (0.02 mmol) all diastereomeric ratios (d.r.) of **2a** were >20:1; b) all conversions (Conv.) and regiomer ratios (r.r. of **2a:3a**) were obtained by <sup>1</sup>H NMR with Ph<sub>3</sub>CH as internal standard, N. R.: no reaction, N.D. : not determined; c) The enantiomeric ratios (e.r.) were detected by GC.



## Limitations of the method

Below we provide examples that demonstrate limitations in the developed method with four different substrate classes. Namely, we found a *Z*-configured olefin did not react, but rather isomerized to the *E*-configured olefin under the reaction conditions. This was determined by monitoring the reaction by TLC, which showed a spot-to-spot conversion of the *Z*- to the *E*-isomer of 1-(cyclohex-1-en-1-yl)but-2-en-1-one. The *E*-isomer of this substrate has independently been shown to convert to the cyclized product (Scheme 2, eq. 1). Please note that both of these reactions were performed with an IDPi catalyst containing a 2-naphthyl unit in the 3,3' position.<sup>2</sup> Further, in the manuscript, all substrates contained a methyl group in the  $\alpha$ -position of the divinyl ketone. When this methyl group is simply replaced with an ethyl group, we observe very poor conversion of the starting material. Only one isomer is apparently formed, which is suggested to be the exocyclic vinyl cyclopentenone (by empirical analogy to product **2a**). The enantiomeric ratio of this product was determined to be 89:11 (Scheme 2, eq. 2). The reaction of the  $\alpha,\alpha$ -dimethyl divinyl ketone actually proceeded much more rapidly than our model substrate (**1a**) to afford two endocyclic diastereoisomers (d.r. 1.45:1). This is in contrast to the exocyclic isomer that we typically observe with the  $\alpha$ -methyl-substituted substrates. The enantioselectivities were determined to be 85:15 and 87:13 for each isomer (Scheme 2, eq. 3). We also attempted to cyclize a substrate with  $\beta,\beta$ -dialkyl substitution to form a quaternary center. However, this substrate was unreactive (Scheme 2, eq. 4).

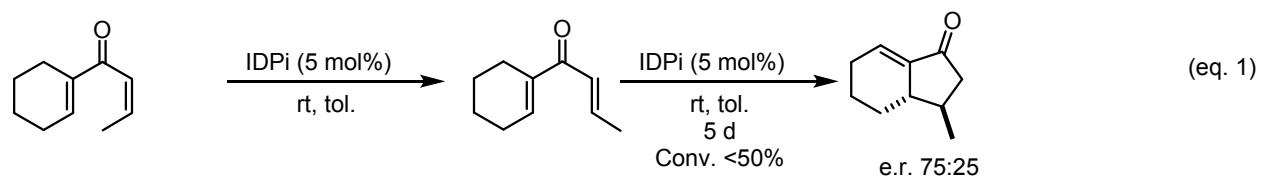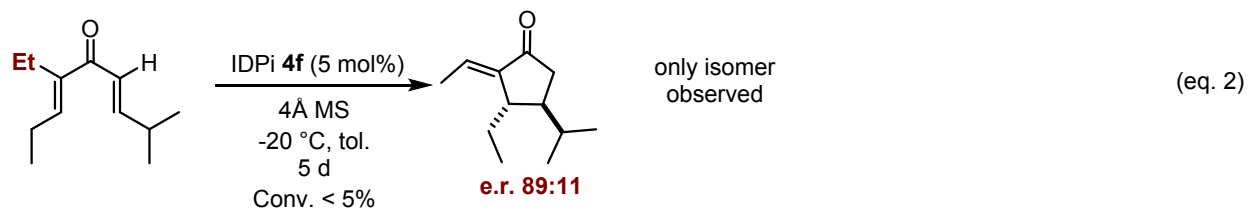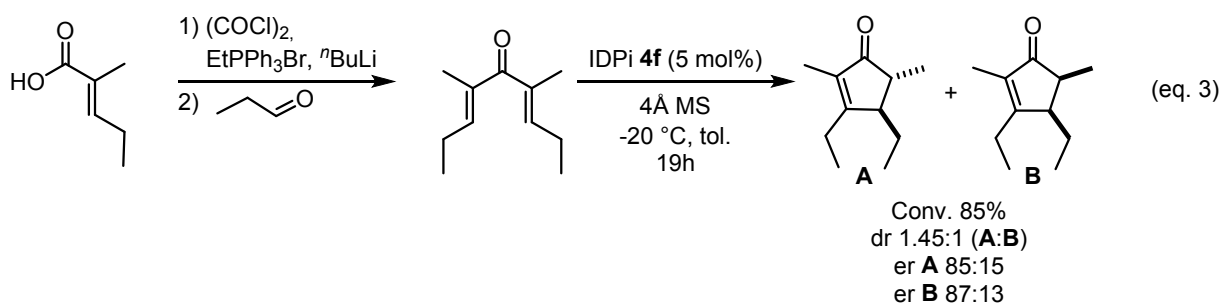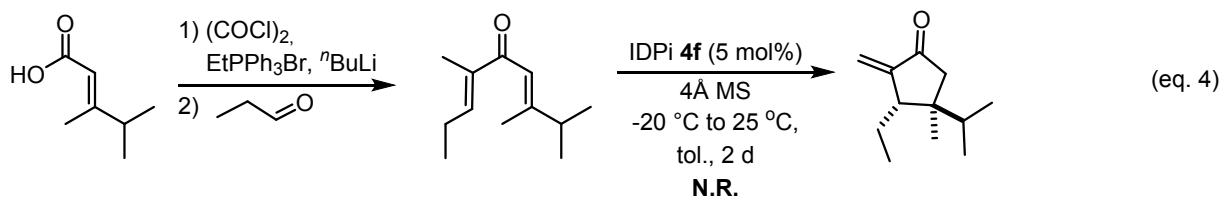

**Scheme 2.** Limitations in reactivity or selectivity for four substrate classes

## Kinetic study via $^1\text{H}$ NMR

In order to investigate the mechanism of this catalytic asymmetric Nazarov reaction, the kinetic profile was elucidated using  $^1\text{H}$  NMR analysis (Fig. S1). The concentration of the substrate and the product was calculated based on an external standard and plotted over the reaction time. (Fig. S2A) Excel's Solver Add-in feature was used to fit the data to a simple exponential model based on first-order kinetics. In addition, the rate of the reaction was plotted over the concentration of the substrate and determined by using the LINEST function in Excel (Fig. S2B). The linearity of this function suggests that the free catalyst is the resting.

### Procedure for kinetic study<sup>3</sup>:

In a 1.5 mL headspace vial, divinylketone **1a** (4.2 mg, 0.025 mmol, 1.0 equiv) was dissolved in 0.5 mL of *tol-d8*. Subsequently, catalyst **4f** (2.45 mg, 1.3  $\mu\text{mol}$ , 0.05 equiv.) and 4 Å molecular sieves (10 mg) were added to the 5 mm NMR tube. The reaction solution was transferred to a NMR tube using a syringe. A 1-mm sealed glass tube filled with  $\text{CH}_2\text{Br}_2$  (approx. 11.34 mg in 0.2 mL of *tol-d8*) was centered inside of the NMR tube to act as an in situ external standard, in order to prevent any possible change in mechanism as a result of an internal standards' possible participation in the reaction. Then the sample was quickly introduced into the NMR spectrometer (Bruker AV400 equipped with a BBFO probehead), which was pre-shimmed and precooled to  $-20\text{ }^\circ\text{C}$ . As soon as the sample was equilibrated, a first short  $^1\text{H}$  NMR spectrum was immediately recorded to determine the substrate concentration relative to the external standard. After that, the sample tuning and shimming was optimized, and  $^1\text{H}$  measurements were taken every 30 minutes for 5 days (30°-pulse, 5.5s delay, 128 scans, 64k points), interleaved with automatic shimming and tuning (Fig. S1) Note that due to the presence of the molecular sieves and the insert with external standard, the sample was not rotated during the experiments.

The data was processed with Topspin 3.5, using zero-filling to 64k complex points, exponential line broadening to 0.3Hz, and fourier transform followed by phase- and baseline-correction (polynomial,  $n=3$ ). The 228 spectra were imported into MestreNova 12, where the integrals for well-resolved substrate and product peaks (see figure S2A) as well as the external signal peak at 3.85ppm ( $\text{CH}_2\text{Br}_2$ ) were measured using the data analysis tool. The concentrations of the substrate and of the product were calculated based on the external standard and plotted over the

reaction time (Fig. S2A). We used the Solver Add-in feature of Excel to fit the data to a simple exponential function based on first-order kinetics.

$$[S] = [S]_0 e^{-k_s(t-t_0)} + C \quad (1)$$

$$[P] = [S]_0(1 - e^{-k_p(t-t_0)}) + C \quad (2)$$

By minimizing the sum of the squared differences, the curve fitting was optimized with rate constants  $k_s = 0.053 \text{ h}^{-1}$  and  $k_p = 0.051 \text{ h}^{-1}$  (for all parameters see Table S1), with excellent accuracy. In Fig. S2B we show the linearity of the differential representation of the decay functions:

$$k_s[S] = -\frac{d[S]}{dt} \quad (3)$$

with a goodness-of-fit  $R^2=0.997$ .

Note that the growth in the concentration of product only reaches 84% of the theoretical complete conversion (fitted  $[S]_0 = 42.5 \text{ mM}$ ). This is probably due to deterioration of the catalyst as well as further reaction of the product within the imperfect reaction conditions of the NMR tube.

**Table. S2. Parameter-fitting to first order exponential functions (colors correspond to signals in Figure S2).**

|                        | 1a    | 1a   | 2a    | 2a   |
|------------------------|-------|------|-------|------|
| $[S]_0$ (mM)           | 49.5  | 50.0 | 41.7  | 41.2 |
| $k$ (h <sup>-1</sup> ) | 0.053 |      | 0.051 |      |
| $t_0$ (h)              | 0.00  | 0.00 | 0.00  | 0.00 |
| $C$ (mM)               | 0.00  | 0.00 | 0.00  | 0.00 |
| $R^2$                  | 0.997 |      | 0.998 |      |

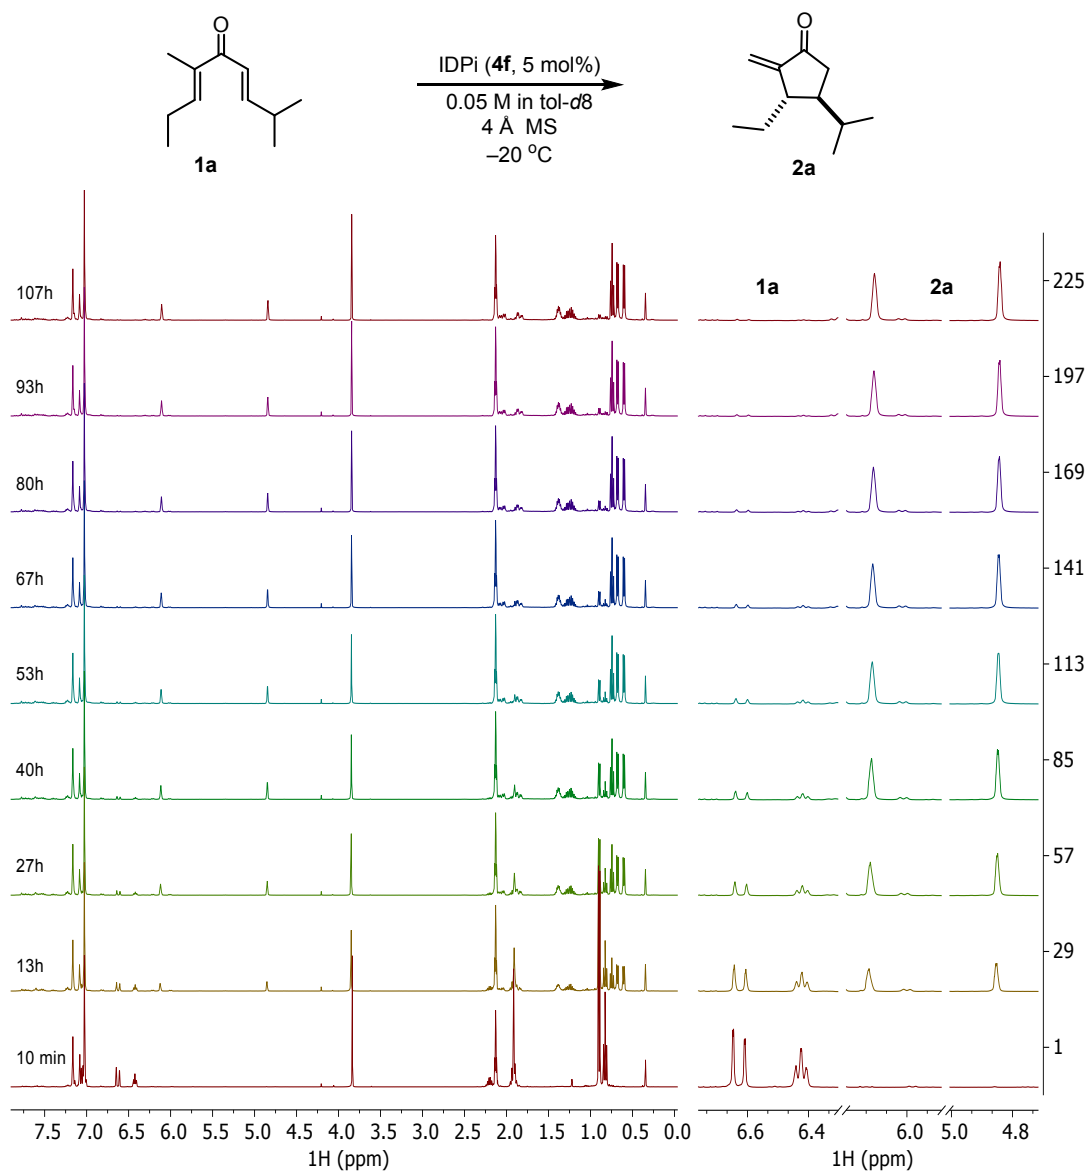

**Fig. S1. Kinetic studies of catalytic asymmetric Nazarov reaction**



## Synthesis<sup>4</sup> & characterization of substrates

### Method A

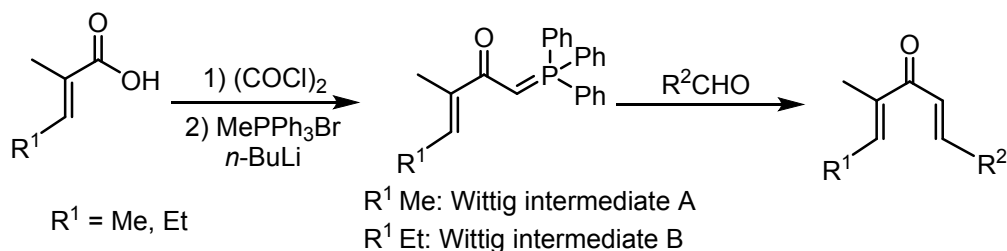

### Method B

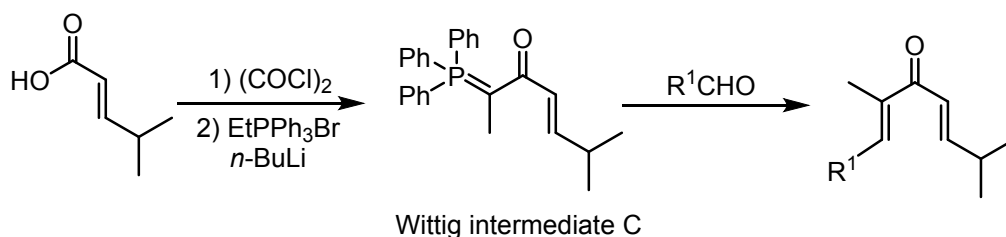

**Fig. S3. Preparation of divinyl ketones**

**General procedure for preparation of divinyl ketones:** The commercially available *E*-form carboxylic acid (50.0 mmol) was dissolved in DCM (150 mL), and then oxalyl chloride (8.7 mmol) was slowly added to the mixture at room temperature. After stirring for 2 h, the mixture was concentrated *in vacuo* to give the resulting acid chloride as a colorless liquid, which was directly used in the next step without further purification. To a solution of methyltriphenylphosphonium bromide (100 mmol, 2 equiv) in anhydrous THF (500 mL), *n*-BuLi (48 mL, 2.5 M in hexane) was added dropwise under Ar atmosphere. After stirring at room temperature for 2 h, freshly prepared acid chloride in THF (20 mL) was slowly added. The mixture was stirred overnight and was quenched with water (300 mL). The mixture was concentrated to remove THF. The residue was diluted with DCM (200 mL) and organic layer was separated. The aqueous layer was extracted with DCM (3 × 200 mL). The organic layers were combined, washed with brine, dried over MgSO<sub>4</sub>, filtered, and concentrated to give the Wittig intermediate as dark brown gum (35 g), which could be used directly in the next step. The resulting Wittig intermediate was dissolved in anhydrous DCM (20 mL), and the commercially available aldehyde (40 mmol) was added at room temperature. The mixture was stirred overnight until the aldehyde was consumed (monitored by TLC, PAA stain). The solution was carefully

concentrated and purified by column chromatography on silica-gel (Et<sub>2</sub>O: Pentane = 1:100 to 1:50) to give the resulting products.

(3*E*,6*E*)-2,6-dimethylnona-3,6-dien-5-one (**1a**)

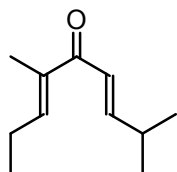

**1a** was prepared following method A using isobutyraldehyde (2.4 g, 33 mmol) and Wittig intermediate B (35 g).

2.7g, 50%, colorless oil.

**<sup>1</sup>H NMR** (500 MHz, CDCl<sub>3</sub>) δ 6.81 (dd, *J* = 15.4, 6.8 Hz, 1H), 6.59 (dd, *J* = 15.6, 1.3 Hz, 1H), 6.58 (tq, *J* = 7.0 Hz, *J* = 1.5 Hz, 1H), 2.49 (dq, *J* = 13.6, 6.8, 1.4 Hz, 1H), 2.30–2.22 (m, 2H), 1.83 (q, *J* = 1.0 Hz, 3H), 1.09 (t, *J* = 7.6 Hz, 3H), 1.08 (d, *J* = 6.8 Hz, 6H).

**<sup>13</sup>C NMR** (125 MHz, CDCl<sub>3</sub>) δ 192.9, 153.4, 144.1, 137.5, 122.4, 31.4, 22.5, 21.6, 13.3, 11.8.

**HRMS** (EI) (*m/z*): calculated for C<sub>11</sub>H<sub>18</sub>O<sub>1</sub> [M]<sup>+</sup>: 166.1352; found 166.1353.

(3*E*,6*E*)-4-methyldeca-3,6-dien-5-one (**1b**)

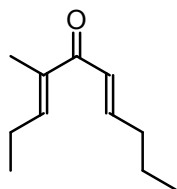

**1b** was prepared following method A using butyraldehyde (1.2 g, 16.6 mmol) and Wittig intermediate B (17 g).

710 mg, 26%, colorless oil.

**<sup>1</sup>H NMR** (500 MHz, CDCl<sub>3</sub>) δ 6.86 (dtd, *J* = 15.2, 6.9, 1.2 Hz, 1H), 6.66 (dt, *J* = 15.3, 1.3 Hz, 1H), 6.59 (t, *J* = 7.1, 1H), 2.34–2.23 (m, 2H), 2.27–2.18 (m, 2H), 1.85 (s, 3H), 1.57–1.46 (m, 2H), 1.10 (td, *J* = 7.6, 1.1 Hz, 3H), 0.96 (t, *J* = 7.4, 3H).

**<sup>13</sup>C NMR** (125 MHz, CDCl<sub>3</sub>) δ 192.6, 147.1, 144.1, 137.4, 125.4, 34.8, 22.5, 21.7, 13.9, 13.3, 11.8.

**HRMS** (ESI) (*m/z*): calculated for C<sub>11</sub>H<sub>19</sub>O<sub>1</sub> [M+H]<sup>+</sup>: 167.1430; found 167.1432.

(3*E*,6*E*)-4,9-dimethyldeca-3,6-dien-5-one (**1c**)

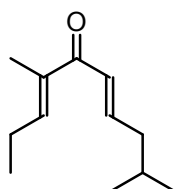

**1c** was prepared following method A using 3-methylbutanal (1.1 g, 12.8 mmol) and Wittig intermediate B (13 g).

800 mg, 35 %, colorless oil.



**<sup>1</sup>H NMR** (500 MHz, CDCl<sub>3</sub>) δ 6.80 (ddd, *J* = 15.3, 7.9, 7.1 Hz, 1H), 6.61 (dt, *J* = 15.3, 1.3 Hz, 1H), 6.56 (tq, *J* = 6.7, 1.3 Hz, 1H), 2.24 (td, *J* = 7.4, 1.1 Hz, 2H), 2.14–2.06 (m, 2H), 1.81 (t, *J* = 1.2 Hz, 3H), 1.75 (dt, *J* = 13.4, 6.7 Hz, 1H), 1.06 (td, *J* = 7.6, 0.9 Hz, 3H), 0.91 (dd, *J* = 6.7, 1.0 Hz, 6H).

**<sup>13</sup>C NMR** (125 MHz, CDCl<sub>3</sub>) δ 192.4, 146.1, 144.1, 137.4, 126.3, 42.0, 28.1, 22.5, 22.5, 13.2, 11.7.

**HRMS** (EI) (*m/z*): calculated for C<sub>12</sub>H<sub>20</sub>O<sub>1</sub> [M]<sup>+</sup>: 180.1509; found 180.1508.

(3*E*,6*E*)-8-ethyl-4-methyldeca-3,6-dien-5-one (**1d**)

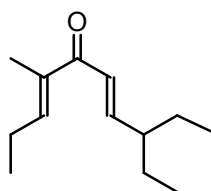

**1d** was prepared following method A using 2-ethylbutanal (1.2 g, 12 mmol) and Wittig intermediate B (12.4 g).

1g, 43%, colorless oil.

**<sup>1</sup>H NMR** (500 MHz, CDCl<sub>3</sub>) δ 6.62–6.54 (m, 3H), 2.35–2.18 (m, 2H), 2.04–1.92 (m, 1H), 1.83 (d, *J* = 1.2 Hz, 3H), 1.55–1.46 (m, 2H), 1.36 (dt, *J* = 13.5, 7.7 Hz, 2H), 1.08 (t, *J* = 7.5 Hz, 3H), 0.86 (t, *J* = 7.4 Hz, 6H).

**<sup>13</sup>C NMR** (125 MHz, CDCl<sub>3</sub>) δ 192.5, 151.3, 144.0, 137.5, 125.3, 46.6, 27.1, 22.5, 13.3, 11.9, 11.8.

**HRMS** (ESI) (*m/z*): calculated for C<sub>13</sub>H<sub>23</sub>O<sub>1</sub> [M+H]<sup>+</sup>: 195.1743; found 195.1743.

(1*E*,4*E*)-1-cyclopropyl-4-methylhepta-1,4-dien-3-one (**1e**)

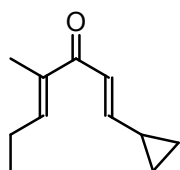

**1e** was prepared following method A using cyclopropanecarboxaldehyde (870 mg, 12.4 mmol) and Wittig intermediate B (11 g).

820 mg, 42%, colorless oil.

**<sup>1</sup>H NMR** (500 MHz, CDCl<sub>3</sub>) δ 6.78 (d, *J* = 15.0 Hz, 1H), 6.57 (td, *J* = 7.2, 1.5 Hz, 1H), 6.33 (dd, *J* = 15.0, 10.1 Hz, 1H), 2.25 (td, *J* = 7.4, 1.0 Hz, 1H), 1.82 (d, *J* = 1.4 Hz, 2H), 1.63–1.56 (m, 2H), 1.08 (t, *J* = 7.6 Hz, 3H), 0.97–0.90 (m, 2H), 0.70–0.56 (m, 2H).

**<sup>13</sup>C NMR** (125 MHz, CDCl<sub>3</sub>) δ 191.7, 152.4, 143.5, 137.3, 122.3, 22.5, 15.1, 13.3, 11.8, 8.8.

**HRMS** (EI) (*m/z*): calculated for C<sub>11</sub>H<sub>16</sub>O<sub>1</sub> [M]<sup>+</sup>: 164.1196; found 164.1196.

(1*E*,4*E*)-1-cyclobutyl-4-methylhepta-1,4-dien-3-one (**1f**)

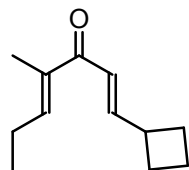

**1f** was prepared following method A using cyclobutanecarbaldehyde (500 mg, 4.2 mmol) and Wittig intermediate B (3.9 g).

780 mg, 89%, colorless oil.

**<sup>1</sup>H NMR** (500 MHz, CDCl<sub>3</sub>) δ 6.93 (dd, *J* = 15.3, 7.0 Hz, 1H), 6.57 (tq, *J* = 6.5 Hz *J* = 1.5 Hz, 1H), 6.56 (dd, *J* = 15.2, 1.4 Hz, 1H), 3.21–2.99 (m, 1H), 2.30–2.23 (m, 2H), 2.19 (m, 2H), 1.97 (m, 3H), 1.86 (m, 1H), 1.83 (s, 3H), 1.08 (t, *J* = 7.6 Hz, 3H).

**<sup>13</sup>C NMR** (125 MHz, CDCl<sub>3</sub>) δ 192.7, 150.6, 144.1, 137.5, 122.9, 38.3, 28.2, 22.5, 18.8, 13.3, 11.8.

**HRMS** (EI) (*m/z*): calculated for C<sub>12</sub>H<sub>19</sub>O<sub>1</sub> [M]<sup>+</sup>: 179.1430; found 179.1429.

(1*E*,4*E*)-1-cyclopentyl-4-methylhepta-1,4-dien-3-one (**1g**)

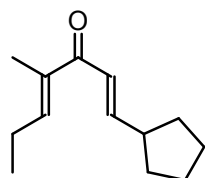

**1g** was prepared following method A using cyclopentanecarbaldehyde (200 mg, 2 mmol) and Wittig intermediate B (1.9 g).

210 mg, 51%, colorless oil.

**<sup>1</sup>H NMR** (500 MHz, CDCl<sub>3</sub>) δ 6.82 (dd, *J* = 15.2, 8.1 Hz, 1H), 6.62 (dd, *J* = 15.3, 1.0 Hz, 1H), 6.57 (tq, *J* = 7.1, 1.5 Hz, 1H), 2.61 (q, *J* = 8.1 Hz, 1H), 2.36–2.19 (m, 2H), 1.88–1.83 (m, 2H), 1.82 (s, 3H), 1.73–1.67 (m, 2H), 1.65–1.56 (m, 2H), 1.48–1.38 (m, 2H), 1.08 (t, *J* = 7.6 Hz, 3H).

**<sup>13</sup>C NMR** (125 MHz, CDCl<sub>3</sub>) δ 192.7, 151.6, 144.0, 137.5, 123.3, 43.5, 32.8, 25.5, 22.5, 13.3, 11.8.

**HRMS** (EI) (*m/z*): calculated for C<sub>13</sub>H<sub>21</sub>O<sub>1</sub> [M]<sup>+</sup>: 193.1587; found 193.1587.

(1*E*,4*E*)-1-cyclohexyl-4-methylhepta-1,4-dien-3-one (**1h**)

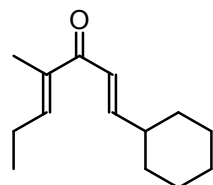

**1h** was prepared following method A using cyclohexanecarbaldehyde (200 mg, 1.8 mmol) and Wittig intermediate B (1.6 g).

200 mg, 54%, colorless oil.

**<sup>1</sup>H NMR** (500 MHz, CDCl<sub>3</sub>) δ 6.79 (dd, *J* = 15.4, 6.9 Hz, 1H), 6.60 (dd, *J* = 15.5, 1.2 Hz, 1H), 6.57 (tq, *J* = 7.0 Hz, *J* = 1.4 Hz, 1H), 2.26 (qd, *J* = 7.5, 1.0 Hz, 2H), 2.22–2.10 (m, 1H), 1.83 (q, *J* = 1.0 Hz, 3H), 1.81–1.72 (m, 4H), 1.68 (dtd, *J* = 12.4, 3.4, 1.7 Hz, 1H), 1.35–1.25 (m, 2H), 1.23–1.13 (m, 3H), 1.08 (t, *J* = 7.6 Hz, 3H).

**<sup>13</sup>C NMR** (125 MHz, CDCl<sub>3</sub>) δ 193.0, 152.3, 144.0, 137.5, 122.7, 41.0, 32.1, 26.2, 25.9, 22.5, 13.3, 11.8.

**HRMS** (EI) (*m/z*): calculated for C<sub>14</sub>H<sub>22</sub>O<sub>1</sub> [M]<sup>+</sup>: 206.1665; found 206.1665.

(3*E*,6*E*)-2,6-dimethyldodeca-3,6-dien-5-one (**1i**)

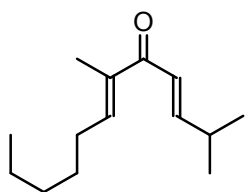

**1i** was prepared following method B using hexanal (200 mg, 2 mmol) and Wittig intermediate C (1.9 g), 220 mg, 50%, colorless oil.

**<sup>1</sup>H NMR** (500 MHz, CDCl<sub>3</sub>) δ 6.80 (dd, *J* = 15.4, 6.8 Hz, 1H), 6.63–6.54 (m, 2H), 2.49 (qd, *J* = 6.8, 1.4 Hz, 1H), 2.25 (qd, *J* = 7.3, 1.0 Hz, 2H), 1.83 (q, *J* = 1.0 Hz, 3H), 1.51–1.43 (m, 2H), 1.38–1.21 (m, 6H), 1.08 (d, *J* = 6.8 Hz, 6H), 0.92 (t, 7.0 Hz, 3H).

**<sup>13</sup>C NMR** (125 MHz, CDCl<sub>3</sub>) δ 192.2, 152.7, 142.1, 132.8, 121.7, 31.0, 30.7, 28.5, 27.8, 21.9, 20.9, 13.4, 11.2.

**HRMS** (EI) (*m/z*): calculated for C<sub>14</sub>H<sub>24</sub>O<sub>1</sub> [M]<sup>+</sup>: 208.1822; found 208.1822.

(3*E*,6*E*)-11-chloro-2,6-dimethylundeca-3,6-dien-5-one (**1j**)

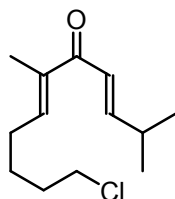

**1j** was prepared following method B using 5-chloropentanal (500 mg, 4.1 mmol) and Wittig intermediate C (3.1 g), 430 mg, 46%, colorless oil.

**<sup>1</sup>H NMR** (500 MHz, CDCl<sub>3</sub>) δ 6.75 (dd, *J* = 15.4, 6.8 Hz, 1H), 6.50 (dd, *J* = 15.3, 1.3 Hz, 1H), 6.47 (dt, *J* = 7.0 Hz, *J* = 1.4 Hz, 1H), 3.50 (t, *J* = 6.5 Hz, 2H), 2.44–2.39 (m, 1H), 2.29–2.13 (m, 2H), 1.82–1.70 (m, 5H), 1.63–1.54 (m, 2H), 1.02 (d, *J* = 6.8 Hz, 6H).

**<sup>13</sup>C NMR** (125 MHz, CDCl<sub>3</sub>) δ 192.8, 153.8, 141.4, 138.5, 122.4, 44.8, 32.3, 31.5, 28.4, 26.1, 21.7, 12.1.

**HRMS** (ESI) (*m/z*): calculated for C<sub>13</sub>H<sub>21</sub> Cl<sub>1</sub>O<sub>1</sub>Na<sub>1</sub> [M+Na]<sup>+</sup>: 251.1173; found 251.1172.

(3*E*,6*E*)-4,8-dimethyl-1-phenylnona-3,6-dien-5-one (**1k**)

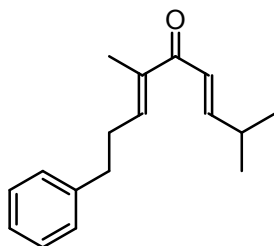

**1k** was prepared following method B using 3-phenylpropanal (1.3 g, 9.7 mmol) and Wittig intermediate C (7 g).

1.3 g, 54 %, colorless oil.

**<sup>1</sup>H NMR** (500 MHz, CDCl<sub>3</sub>) δ 7.34–7.28 (m, 2H), 7.24–7.18 (m, 3H), 6.77 (dd, *J* = 15.5, 6.7 Hz, 1H), 6.59 (tq, *J* = 7.3, 1.5 Hz, 1H), 6.52 (dd, *J* = 15.4, 1.4 Hz, 1H), 2.79 (t, *J* = 7.7 Hz, 2H), 2.58 (ddd, *J* = 9.1, 7.7, 6.6 Hz, 2H), 2.51–2.41 (m, 1H), 1.80 (q, *J* = 1.0 Hz, 3H), 1.07 (d, *J* = 6.8 Hz, 6H).

**<sup>13</sup>C NMR** (125 MHz, CDCl<sub>3</sub>) δ 193.0, 153.7, 141.2, 141.2, 138.5, 128.6, 128.5, 126.3, 122.6, 34.9, 31.4, 31.0, 21.6, 12.0.

**HRMS** (ESI) (*m/z*): calculated for C<sub>17</sub>H<sub>23</sub>O<sub>1</sub> [M+H]<sup>+</sup>: 243.1743; found 243.1744.

(2*E*,5*E*)-3,7-dimethylocta-2,5-dien-4-one (**1l**)

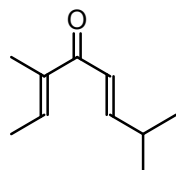

**1l** was prepared following method A using isobutyraldehyde (2.9 g, 40 mmol) and Wittig intermediate A (35 g).

3g, 50%, colorless oil.

**<sup>1</sup>H NMR** (500 MHz, CDCl<sub>3</sub>) δ 6.81 (dd, *J* = 15.4, 6.7 Hz, 1H), 6.71 (qd, *J* = 6.9, 1.4 Hz, 1H), 6.58 (dd, *J* = 15.4, 1.3 Hz, 1H), 2.48 (qd, *J* = 6.8, 1.4 Hz, 1H), 1.87 (dd, *J* = 6.9, 1.3 Hz, 3H), 1.84 (t, *J* = 1.3 Hz, 3H), 1.08 (d, *J* = 6.8 Hz, 6H).

**<sup>13</sup>C NMR** (125 MHz, CDCl<sub>3</sub>) δ 192.7, 153.4, 139.1, 137.2, 122.4, 31.4, 21.6, 14.9, 11.7.

**HRMS** (EI) (*m/z*): calculated for C<sub>10</sub>H<sub>16</sub>O<sub>1</sub> [M]<sup>+</sup>: 152.1196; found 152.1197.

(2*E*,5*E*)-3,7,7-trimethylocta-2,5-dien-4-one (**1m**)

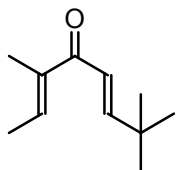

**1m** was prepared following method A using pivalaldehyde (1 g, 11.6 mmol) and Wittig intermediate A (35 g).

300 mg, 15%, colorless oil.

**<sup>1</sup>H NMR** (500 MHz, CDCl<sub>3</sub>) δ 6.83 (d, *J* = 15.6 Hz, 1H), 6.68 (qq, *J* = 10 Hz, *J* = 1.4 Hz, 1H), 6.53 (d, *J* = 15.6 Hz, 1H), 1.87 (dd, *J* = 6.9, 1.2 Hz, 3H), 1.83 (t, *J* = 1.3 Hz, 3H), 1.09 (s, 9H).

**<sup>13</sup>C NMR** (125 MHz, CDCl<sub>3</sub>) δ 192.9, 157.0, 139.2, 137.1, 120.2, 34.0, 29.0, 14.9, 11.7.

**HRMS** (ESI) ( $m/z$ ): calculated for  $C_{11}H_{19}O_1$   $[M+H]^+$ : 167.1430; found 167.1432.

(1*E*,4*E*)-1-(2-bromophenyl)-4-methylhepta-1,4-dien-3-one (**1n**)

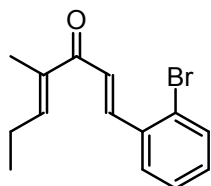

**1n** was prepared following method A using 2-bromobenzaldehyde (500 mg, 2.7 mmol) and Wittig intermediate B (2.5 g).

400 mg, 53%, yellow oil.

**$^1H$  NMR** (500 MHz,  $CDCl_3$ )  $\delta$  7.91 (d,  $J = 15.7$  Hz, 1H), 7.65 (dd,  $J = 7.8, 1.7$  Hz, 1H), 7.61 (dd,  $J = 8.0, 1.2$  Hz, 1H), 7.33 (td,  $J = 7.6, 1.0$  Hz, 1H), 7.21 (td,  $J = 7.8, 1.7$  Hz, 1H), 7.18 (d,  $J = 15.7$  Hz, 1H), 6.70 (tq,  $J = 7.3, 1.4$  Hz, 1H), 2.32 (pd,  $J = 8.1, 7.5, 1.0$  Hz, 1H), 1.90 (s, 3H), 1.12 (t,  $J = 7.6$  Hz, 3H).

**$^{13}C$  NMR** (125 MHz,  $CDCl_3$ )  $\delta$  192.1, 145.0, 141.1, 137.5, 135.4, 133.4, 130.8, 127.7, 127.6, 125.5, 125.0, 22.5, 13.2, 11.8.

**HRMS** (EI) ( $m/z$ ): calculated for  $C_{14}H_{15}O_1Br_1$   $[M]^+$ : 278.0301; found 278.0303.

## Preparation of racemate of Nazarov products

The racemic Nazarov products were prepared using 10 mol% of methanesulfonic acid at room temperature or boron trifluoride diethyl etherate in DCM at 0 °C to provide two regioisomers. Experimental: the divinyl ketone (0.2 mmol) was dissolved in DCM (1 mL). To this solution was added methanesulfonic acid (10 mol%). The mixture was stirred until the divinyl ketone was consumed (as monitored by TLC analysis) and quenched by NaHCO<sub>3</sub> (sat. aq., 0.5 mL). The organic layer was separated, dried over anhydrous MgSO<sub>4</sub>, filtered, and concentrated *in vacuo*. The residue was purified by preparative TLC plate (silica-gel) to afford racemic enones.

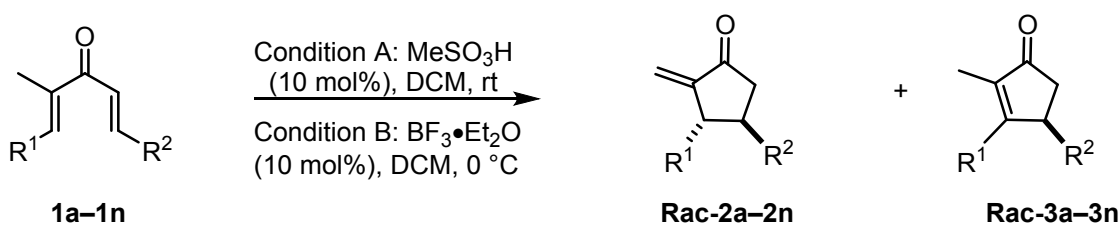

**Fig. 4. Preparation of racemic product**

## General procedure of the asymmetric Nazarov cyclization

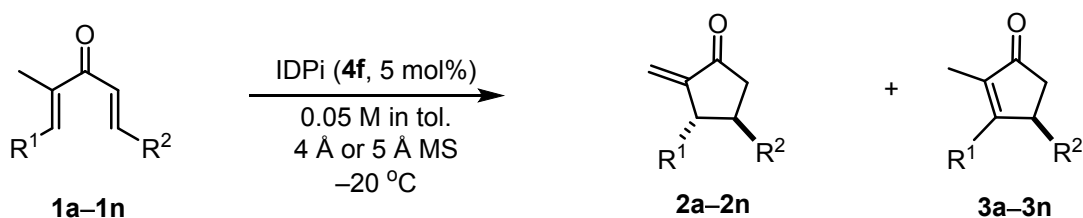

**Fig. 5. The asymmetric Nazarov cyclization of simple divinyl ketones**

To a flamed-dried Schlenk flask was added molecular sieves (100 mg). The flask was degassed and purged with Ar 3 times. A solution of divinyl ketone (0.2 mmol) in dried toluene (4 mL) was added to this flask under Ar. After cooling the reaction mixture with dry ice, the catalyst (**4f**, 5 mol%) was added. The reaction mixture was stirred at -20 °C until the starting material was consumed (as monitored by TLC) and was then passed through a pad of silica-gel, washing with pentane to remove the toluene. The product was eluted as a mixture with Et<sub>2</sub>O:Pentane (3:7, 100 mL). The solvent was carefully concentrated (650 mbar, at 35 °C) to obtain a colorless residue. Before purification, a <sup>1</sup>H NMR was measured with Ph<sub>3</sub>CH as internal standard (the ratio of internal standard and divinyl ketone is around 1:1 for each case) to determine the NMR yield and

region-, diastereoselectivity. For volatile products (**1a–1c**, **1e**, **1f**, **1l**, **1m**), <sup>1</sup>H NMR yields are reported. Compounds that were not volatile (**1d**, **1g**, **1h**, **1i**, **1j**, **1k**) were then purified by chromatography (Et<sub>2</sub>O: pentane 1:100 to 1:50) to afford the resulting enone products. (Note: the quality of 4 Å Molecular sieves was very important for regioselectivity. The batch of 4 Å and 5 Å Molecular sieves in this supporting information was purchased from Sigma-Aldrich, activated at 200 °C under 0.001 mbar for 2 days.)

### Characterization of enones products

#### (3*S*,4*S*)-3-ethyl-4-isopropyl-2-methylenecyclopentan-1-one (**2a**)

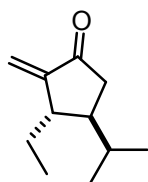

Divinyl ketone **1a** (33 mg, 0.2 mmol) was subjected to the general procedure. 4 Å molecular sieves were used. After 7 days, the reaction had reached full conversion. The <sup>1</sup>H NMR yield of this mixture was measured with Ph<sub>3</sub>CH as an internal standard (72 %). The regioisomeric ratio was >20:1. (Note: the product is volatile.)

The catalyst could be recovered (95%) via flash column chromatography following completion of the reaction.

<sup>1</sup>H NMR (500 MHz, CDCl<sub>3</sub>) δ 6.02 (dd, *J* = 2.5, 1.1 Hz, 1H), 5.24 (dd, *J* = 2.3, 1.1 Hz, 1H), 2.55 (dq, *J* = 6.0, 3.0 Hz, 1H), 2.42 (ddd, *J* = 18.8, 8.6, 0.9 Hz, 1H), 2.17 (dd, *J* = 18.8, 6.0 Hz, 1H), 1.86 (dq, *J* = 8.6, 5.5 Hz, 1H), 1.76–1.67 (m, 1H), 1.62 (ddd, *J* = 15.0, 7.6, 6.2 Hz, 1H), 1.58–1.48 (m, 1H), 0.92 (t, *J* = 7.4 Hz, 3H), 0.89 (d, *J* = 6.8 Hz, 3H), 0.84 (d, *J* = 6.8 Hz, 3H).

<sup>13</sup>C NMR (125 MHz, CDCl<sub>3</sub>) δ 207.9, 149.0, 117.4, 45.4, 43.4, 39.6, 30.6, 26.9, 21.0, 18.3, 10.9.

[α]<sub>D</sub><sup>25</sup> = 12.8 (*c* = 0.25, CDCl<sub>3</sub>)

HRMS (ESI) (*m/z*): calculated for C<sub>11</sub>H<sub>18</sub>O<sub>1</sub>Na<sub>1</sub> [M+Na]<sup>+</sup>: 189.1250; found 189.1252.

GC: The enantiomeric ratio was measured by GC analysis on a chiral column (BGB 176 column: 25.0 m; i.D. 0.25 mm). Temperature: 350 °C (detector), 80 °C (oven, 3 min, iso) to 130 °C (15 °C/min, 27 min iso); Gas: H<sub>2</sub> (0.5 bar); *t<sub>R</sub>* = 14.94 min (minor), *t<sub>R</sub>* = 16.97 min (major), e.r. = 3:97.

#### (3*S*,4*R*)-3-ethyl-2-methylene-4-propylcyclopentan-1-one (**2b**)

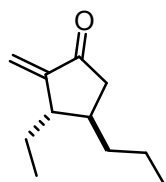

Divinyl ketone **1b** (33 mg, 0.2 mmol) was subjected to the general procedure. 5 Å molecular sieves were used. After 14 days, the reaction had reached full

conversion.  $^1\text{H}$  NMR yield of this mixture was measured with  $\text{Ph}_3\text{CH}$  as an internal standard (62%). The regioisomeric ratio was 10:1. (Note: the product is volatile.)

$^1\text{H}$  NMR (500 MHz,  $\text{CDCl}_3$ )  $\delta$  6.03 (dd,  $J = 2.7, 1.1$  Hz, 1H), 5.23 (dd,  $J = 2.4, 1.1$  Hz, 1H), 2.54 (ddd,  $J = 18.2, 7.8, 0.7$  Hz, 1H), 2.38 (qt,  $J = 5.8, 2.4$  Hz, 1H), 2.00 (dd,  $J = 18.2, 6.9$  Hz, 1H), 1.95–1.87 (m, 1H), 1.70–1.61 (m, 1H), 1.61–1.56 (m, 1H), 1.54–1.48 (m, 1H), 1.41–1.35 (m, 1H), 1.35–1.27 (m, 1H), 1.26–1.17 (m, 1H), 0.97–0.90 (t, 7.5 Hz, 3H), 0.90 (t,  $J = 7.5$  Hz, 3H).

$^{13}\text{C}$  NMR (125 MHz,  $\text{CDCl}_3$ )  $\delta$  207.3, 148.6, 117.4, 48.6, 43.5, 37.6, 25.6, 20.9, 14.3, 10.9.

HRMS (ESI) ( $m/z$ ): calculated for  $\text{C}_{11}\text{H}_{18}\text{O}_1\text{Na}_1$  [ $\text{M}+\text{Na}$ ] 189.1250; found 189.1251.

$[\alpha]_{\text{D}}^{25} = -38.8$  ( $c = 0.5$ ,  $\text{CDCl}_3$ )

GC: The enantiomeric ratio is measured by GC analysis on a chiral column (BGB 176 column: 25.0 m; i.D. 0.25 mm). Temperature: 350 °C (detector), 80 °C (oven, 3 min, iso) to 130 °C (15 °C/min, 30 min iso) to 220 °C (15 °C/min, 10 min iso); Gas:  $\text{H}_2$  (0.5 bar);  $t_{\text{R}} = 15.39$  min (minor),  $t_{\text{R}} = 17.11$  min (major), e.r. = 7:93.

(3*S*,4*R*)-3-ethyl-4-isobutyl-2-methylenecyclopentan-1-one (**2c**)

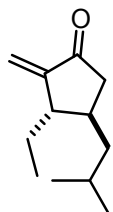

Divinyl ketone **1c** (36 mg, 0.2 mmol) was subjected to the general procedure. 4 Å molecular sieves were used. After 13 days, the reaction had reached 89% conversion.

$^1\text{H}$  NMR yield of this mixture was measured with  $\text{Ph}_3\text{CH}$  as an internal standard (67 %). The regioisomeric ratio was >20:1. (Note: the product is volatile.)

$^1\text{H}$  NMR (500 MHz,  $\text{CDCl}_3$ )  $\delta$  6.04 (dd,  $J = 2.7, 1.1$  Hz, 1H), 5.24 (dd,  $J = 2.4, 1.1$  Hz, 1H), 2.55 (dd,  $J = 10.4, 0.8$  Hz, 1H), 2.40–2.30 (m, 1H), 2.03–1.91 (m, 2H), 1.72–1.53 (m, 3H), 1.41–1.32 (m, 1H), 1.21–1.12 (m, 1H), 0.92 (d,  $J = 6.5$  Hz, 3H), 0.89 (d,  $J = 6.5$  Hz, 3H).

$^{13}\text{C}$  NMR (125 MHz,  $\text{CDCl}_3$ )  $\delta$  207.3, 148.5, 117.4, 48.8, 44.8, 43.7, 35.6, 26.2, 25.3, 23.7, 22.1, 10.9.

$[\alpha]_{\text{D}}^{25} = -60$  ( $c = 0.25$ ,  $\text{CHCl}_3$ )

HRMS (EI) ( $m/z$ ): calculated for  $\text{C}_{12}\text{H}_{20}\text{O}_1$  [ $\text{M}$ ] $^+$ : 180.1509; found 180.1510.

GC: The enantiomeric ratio was measured by GC analysis on a chiral column (BGB 176 column: 25.0 m; i.D. 0.25 mm). Temperature: 350 °C (detector), 80 °C (oven, 3 min, iso) to 130 °C (15 °C/min, 27 min iso); Gas:  $\text{H}_2$  (0.5 bar);  $t_{\text{R}} = 18.41$  min (minor),  $t_{\text{R}} = 20.23$  min (major), e.r. = 7:93.



(3*S*,4*S*)-3-ethyl-2-methylene-4-(pentan-3-yl)cyclopentan-1-one (**2d**)

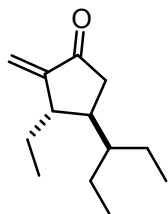

Divinyl ketone **1d** (39 mg, 0.2 mmol) was subjected to the general procedure. 4 Å molecular sieves were used. After 12 days, the reaction had reached 86% conversion. <sup>1</sup>H NMR yield of this mixture was measured with Ph<sub>3</sub>CH as an internal standard (80%). The regioisomeric ratio was >20:1. The residue was purified by chromatography on silica-gel to afford **2d** (30 mg, 0.15 mmol, 77%).

<sup>1</sup>H NMR (500 MHz, CDCl<sub>3</sub>) δ 6.02 (dd, *J* = 2.6, 1.1 Hz, 1H), 5.23 (dd, *J* = 2.3, 1.1 Hz, 1H), 2.62–2.51 (m, 1H), 2.39 (dd, *J* = 18.3, 8.4 Hz, 1H), 2.19–2.04 (m, 2H), 1.64 (dq, *J* = 15.0, 7.5, 5.7 Hz, 1H), 1.61–1.50 (m, 1H), 1.46–1.29 (m, 2H), 1.29–1.07 (m, 3H), 0.95–0.85 (m, 9H).

<sup>13</sup>C NMR (125 MHz, CDCl<sub>3</sub>) δ 207.7, 149.2, 117.1, 45.2, 43.9, 39.7, 39.3, 26.7, 24.1, 22.2, 12.3, 12.0, 10.8.

[α]<sub>D</sub><sup>25</sup> = –10.0 (*c* = 0.54, CHCl<sub>3</sub>)

HRMS (ESI) (*m/z*): calculated for C<sub>13</sub>H<sub>22</sub>O<sub>1</sub>Na<sub>1</sub> [M+Na]<sup>+</sup>: 217.1563; found 217.1563.

GC: The enantiomeric ratio was measured by GC analysis on a chiral column (BGB 176 column: 25.0 m; i.D. 0.25 mm). Temperature: 350 °C (detector), 80 °C (oven, 3 min, iso) to 130 °C (15 °C/min, 30 min iso) to 220 °C (15 °C/min, 10 min iso); *t*<sub>R</sub> = 25.61 min (minor), *t*<sub>R</sub> = 27.85 min (major), e.r. = 5:95.

(3*S*,4*S*)-4-cyclopropyl-3-ethyl-2-methylenecyclopentan-1-one (**2e**)

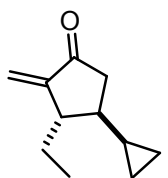

Divinyl ketone **1e** (33 mg, 0.2 mmol) was subjected to the general procedure. 5 Å molecular sieves were used. After 14 days, the reaction had reached full conversion. <sup>1</sup>H NMR yield of this mixture was measured with Ph<sub>3</sub>CH as an internal standard (51% of **2e** and 48% of **3e**). The regioisomeric ratio was 1:1.

(Note: the products are volatile.)

<sup>1</sup>H NMR (500 MHz, CDCl<sub>3</sub>) δ 6.05 (dd, *J* = 2.5, 1.1 Hz, 1H), 5.26 (dd, *J* = 2.3, 1.1 Hz, 1H), 2.61 (dt, *J* = 5.7, 2.7 Hz, 1H), 2.51 (dd, *J* = 18.4, 7.9 Hz, 1H), 2.18 (dd, *J* = 18.4, 6.5 Hz, 1H), 1.70–1.58 (m, 2H), 1.32 (ddt, *J* = 11.3, 9.0, 4.4 Hz, 1H), 0.94 (t, *J* = 7.4 Hz, 3H), 0.71–0.63 (m, 1H), 0.58–0.49 (m, 1H), 0.49–0.41 (m, 1H), 0.20 (dt, *J* = 9.6, 4.8 Hz, 1H), 0.12 (dt, *J* = 9.4, 4.8 Hz, 1H).

<sup>13</sup>C NMR (125 MHz, CDCl<sub>3</sub>) δ 207.1, 148.7, 117.5, 49.5, 43.4, 42.7, 29.9, 25.7, 16.2, 10.9, 4.7, 3.1.

[α]<sub>D</sub><sup>25</sup> = 23.1 (*c* = 0.20, CDCl<sub>3</sub>)

HRMS (EI) (*m/z*): calculated for C<sub>11</sub>H<sub>16</sub>O<sub>1</sub> [M]<sup>+</sup>: 164.1196; found 164.1197.

GC: The enantiomeric ratio was measured by GC analysis on a chiral column (BGB 176 column: 25.0 m; i.D. 0.25 mm). Temperature: 220 °C (injector), 350 °C (detector), 80 °C (3 min, iso) to 130 °C (15 °C/min, 27 min iso); Gas: H<sub>2</sub> (0.5 bar); *t*<sub>R</sub> = 18.32 min (minor), *t*<sub>R</sub> = 21.35 min (major), e.r. = 8:92.

(*S*)-4-cyclopropyl-3-ethyl-2-methylcyclopent-2-en-1-one (**3e**)

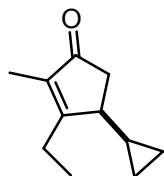

<sup>1</sup>H NMR (500 MHz, CDCl<sub>3</sub>) δ 2.70–2.46 (m, 3H), 2.24–2.09 (m, 2H), 1.70 (dd, *J* = 1.8, 0.6 Hz, 3H), 1.12 (t, *J* = 7.7 Hz, 3H), 0.72–0.54 (m, 1H), 0.51–0.43 (m, 1H), 0.43–0.33 (m, 1H), 0.16–0.11 (m, 1H).

<sup>13</sup>C NMR (125 MHz, CDCl<sub>3</sub>) δ 209.3, 178.0, 135.6, 45.2, 41.0, 22.5, 15.1, 12.3, 7.9, 5.4, 2.2.

HRMS (EI) (*m/z*): calculated for C<sub>11</sub>H<sub>16</sub>O<sub>1</sub> [M]<sup>+</sup>: 164.1197; found 164.1197.

[α]<sub>D</sub><sup>25</sup> = 15 (*c* = 0.54, CDCl<sub>3</sub>)

GC: The enantiomeric ratio was measured by GC analysis on a chiral column (BGB 176 column: 25.0 m; i.D. 0.25 mm). Temperature: 220 °C (injector), 350 °C (detector), 80 °C (3 min, iso) to 130 °C (15 °C/min, 27 min iso); Gas: H<sub>2</sub> (0.5 bar); *t*<sub>R</sub> = 27.52 min (minor), *t*<sub>R</sub> = 29.47 min (major), e.r. = 0.3:99.7.

(3*S*,4*S*)-4-cyclobutyl-3-ethyl-2-methylenecyclopentan-1-one (**2f**)

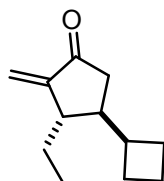

Divinyl ketone **1f** (36 mg, 0.2 mmol) was subjected to the general procedure. 4 Å molecular sieves were used. After 2.5 days, the reaction had reached full conversion. <sup>1</sup>H NMR yield of this mixture was measured with Ph<sub>3</sub>CH as an internal standard (64%). The regioisomeric ratio was >20:1. (Note: the products is volatile.)

**<sup>1</sup>H NMR** (500 MHz, CDCl<sub>3</sub>) δ 6.08–5.94 (m, 1H), 5.24 (t, *J* = 1.5 Hz, 1H), 2.43 (dd, *J* = 18.5, 8.0 Hz, 1H), 2.36 (m, 1H), 2.18–2.08 (m, 1H), 2.08–1.92 (m, 4H), 1.88–1.73 (m, 2H), 1.72–1.54 (m, 3H), 1.47 (dt, *J* = 14.1, 7.2 Hz, 1H), 0.94 (t, *J* = 7.4 Hz, 3H).

**<sup>13</sup>C NMR** (125 MHz, CDCl<sub>3</sub>) δ 207.5, 148.6, 118.1, 46.6, 43.6, 40.3, 40.0, 27.2, 27.1, 26.4, 17.8, 11.3.

**HRMS** (ESI) (*m/z*): calculated for C<sub>12</sub>H<sub>19</sub>O<sub>1</sub> [M+H]<sup>+</sup>: 179.1430; found 179.1433.

[α]<sub>D</sub><sup>25</sup> = 41 (*c* = 0.53, CHCl<sub>3</sub>).

**GC**: The enantiomeric ratio was measured by GC analysis on a chiral column (BGB 176 column: 25.0 m; i.D. 0.25 mm). Temperature: 220 °C (injector), 350 °C (detector), 80 °C (3 min, iso) to 150 °C (15 °C/min, 60 min iso); Gas: H<sub>2</sub> (0.5 bar); t<sub>R</sub> = 16.80 min (minor), t<sub>R</sub> = 18.14 min (major), e.r. = 4:96.

(1*S*,5*S*)-5-ethyl-4-methylene-[1,1'-bi(cyclopentan)]-3-one (**2g**)

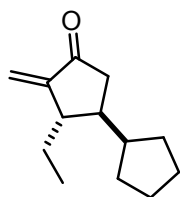

Divinyl ketone **1g** (38 mg, 0.2 mmol) was subjected to the general procedure. 4 Å molecular sieves were used. After 4.5 days, the reaction had reached full conversion. <sup>1</sup>H NMR yield of this mixture was measured with Ph<sub>3</sub>CH as an internal standard (79%). The regioisomeric ratio was >20:1. The residue was purified by chromatography on silica-gel to afford **2g** (30 mg, 0.15 mmol, 78%) as a colorless oil.

**<sup>1</sup>H NMR** (500 MHz, CDCl<sub>3</sub>) δ 6.03 (d, *J* = 1.8 Hz, 1H), 5.25 (d, *J* = 1.5 Hz, 1H), 2.55 (q, *J* = 2.9 Hz, 1H), 2.50 (dd, *J* = 18.7, 8.3 Hz, 2H), 2.18 (dd, *J* = 18.7, 4.4 Hz, 1H), 1.90 (dt, *J* = 8.2, 4.1 Hz, 1H), 1.83–1.77 (m, 1H), 1.77–1.67 (m, 2H), 1.67–1.55 (m, 3H), 1.52 (m, 3H), 1.20–1.06 (m, 2H), 0.94 (t, *J* = 7.4 Hz, 3H).

**<sup>13</sup>C NMR** (125 MHz, CDCl<sub>3</sub>) δ 207.5, 148.6, 117.6, 47.7, 44.2, 42.5, 41.6, 31.1, 30.2, 27.1, 25.4, 25.2, 11.0.

**HRMS** (ESI) (*m/z*): calculated for C<sub>13</sub>H<sub>20</sub>O<sub>1</sub>Na<sub>1</sub> [M+Na]<sup>+</sup>: 215.1406; found 215.1408.

[α]<sub>D</sub><sup>25</sup> = 39 (*c* = 0.21, CHCl<sub>3</sub>)

**GC**: The enantiomeric ratio was measured by GC analysis on a chiral column (BGB 176 column: 25.0 m; i.D. 0.25 mm). Temperature: 350 °C (detector), 80 °C (Oven, 3 min, iso) to 150 °C (20 °C/min, 5 min iso) to 180 °C (15 °C/min, 20 min iso); Gas: H<sub>2</sub> (0.5 bar); t<sub>R</sub> = 17.59 min (minor), t<sub>R</sub> = 18.12 min (major), e.r. = 4:96.

(3*S*,4*S*)-4-cyclohexyl-3-ethyl-2-methylenecyclopentan-1-one (**2h**)

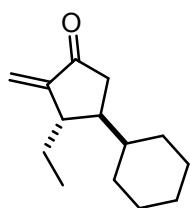

Divinyl ketone **1h** (41 mg, 0.2 mmol) was subjected to the general procedure. 4 Å molecular sieves were used. After 4.5 days, the reaction had reached full conversion. <sup>1</sup>H NMR yield of this mixture was measured with Ph<sub>3</sub>CH as an internal standard (87%). The regioisomeric ratio was >20:1. The residue was purified by chromatography on silica-gel to afford **2h** (35 mg, 0.17 mmol, 85%) as colorless oil.

**<sup>1</sup>H NMR** (500 MHz, CDCl<sub>3</sub>) δ 6.01 (dt, *J* = 2.5, 1.1 Hz, 1H), 5.28–5.18 (m, 1H), 2.61 (q, *J* = 6.1 Hz, 1H), 2.42 (dd, *J* = 18.7, 8.7 Hz, 1H), 2.20 (dd, *J* = 18.7, 5.8 Hz, 1H), 1.84 (dq, *J* = 10.6, 5.4 Hz, 1H), 1.74 (m, 2H), 1.69–1.58 (m, 4H), 1.53 (dt, *J* = 14.1, 7.1 Hz, 1H), 1.41–1.29 (m, 1H), 1.27–1.07 (m, 3H), 1.03–0.90 (m, 2H), 0.93 (t, *J* = 7.3 Hz, 3H).

**<sup>13</sup>C NMR** (125 MHz, CDCl<sub>3</sub>) δ 207.5, 149.1, 117.1, 45.1, 42.8, 41.1, 40.1, 31.3, 28.9, 27.1, 26.6, 26.5, 26.4, 10.8.

**HRMS** (ESI) (*m/z*): calculated for C<sub>14</sub>H<sub>22</sub>O<sub>1</sub>Na<sub>1</sub> [M+Na]<sup>+</sup>: 229.1563; found 229.1565.

[α]<sub>D</sub><sup>25</sup> = 14 (*c* = 0.28, CHCl<sub>3</sub>)

**GC**: The enantiomeric ratio was measured by GC analysis on a chiral column (BGB 176 column: 25.0 m; i.D. 0.25 mm). Temperature: 350 °C (detector), 80 °C (Oven, 3 min, iso) to 150 °C (20 °C/min, 5 min iso) to 180 °C (15 °C/min, 20 min iso); Gas: H<sub>2</sub> (0.5 bar); *t*<sub>R</sub> = 21.60 min (minor), *t*<sub>R</sub> = 22.07 min (major), e.r. = 4:96.

(3*S*,4*S*)-4-isopropyl-2-methylene-3-pentylcyclopentan-1-one (**2i**)

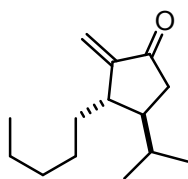

Divinyl ketone **1i** (41 mg, 0.2 mmol) was subjected to the general procedure. 5 Å molecular sieves were used. After 14 days, the reaction reached 93% conversion. <sup>1</sup>H NMR yield of this mixture was measured with Ph<sub>3</sub>CH as an internal standard (74%). The regioisomeric ratio was >20:1. The residue was purified by chromatography on silica-gel to afford **2i** (30 mg, 0.144 mmol, 72%) as colorless oil.

**<sup>1</sup>H NMR** (500 MHz, CDCl<sub>3</sub>) δ 6.01 (dd, *J* = 2.6, 1.0 Hz, 1H), 5.24 (dd, *J* = 2.3, 1.1 Hz, 1H), 2.71–2.54 (m, 1H), 2.42 (dd, *J* = 18.8, 8.6 Hz, 1H), 2.17 (dd, *J* = 18.8, 5.8 Hz, 1H), 1.89–1.79 (m, 1H), 1.78–1.67 (m, 1H), 1.58–1.43 (m, 2H), 1.41–1.23 (m, 6H), 0.90 (m, 6H), 0.85 (d, *J* = 6.7 Hz, 3H).

**<sup>13</sup>C NMR** (125 MHz, CDCl<sub>3</sub>) δ 207.6, 149.7, 117.1, 44.3, 44.3, 39.6, 34.8, 32.2, 30.7, 26.4, 22.7, 21.0, 18.4, 14.2.

**HRMS** (ESI) ( $m/z$ ): calculated for  $C_{14}H_{24}O_1Na_1 [M+Na]^+$ : 231.1719; found 231.1716.

$[\alpha]_D^{25} = 17$  ( $c = 0.52$ ,  $CHCl_3$ )

**GC**: The enantiomeric ratio was measured by GC analysis on a chiral column (BGB 176 column: 25.0 m; i.D. 0.25 mm). Temperature: 350 °C (detector), 80 °C (Oven, 3 min, iso) to 150 °C (20 °C/min, 5 min iso) to 180 °C (15 °C/min, 20 min iso);  $t_R = 16.30$  min (minor),  $t_R = 16.64$  min (major), e.r. = 6:94.

(3*S*,4*S*)-3-(4-chlorobutyl)-4-isopropyl-2-methylenecyclopentan-1-one (**2j**)

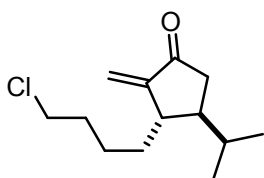

Divinyl ketone **1j** (41 mg, 0.18 mmol) was subjected to the general procedure. 5 Å molecular sieves were used. After 14 days, the reaction had reached 94% conversion.  $^1H$  NMR yield of this mixture was measured with  $Ph_3CH$  as an internal standard (76%). The regioisomeric ratio was >20:1. The residue was purified by chromatography on silica-gel to afford **2j** (30 mg, 0.13 mmol, 73%) as colorless oil.

$^1H$  NMR (500 MHz,  $CDCl_3$ )  $\delta$  6.03 (dd,  $J = 2.5, 1.0$  Hz, 1H), 5.25 (dd,  $J = 2.2, 1.0$  Hz, 1H), 3.55 (t,  $J = 6.6$  Hz, 2H), 2.62 (tq,  $J = 5.8, 2.7$  Hz, 1H), 2.43 (ddd,  $J = 18.8, 8.6, 0.8$  Hz, 1H), 2.18 (dd,  $J = 18.8, 5.8$  Hz, 1H), 1.89–1.74 (m, 3H), 1.72 (qd,  $J = 6.8, 5.4$  Hz, 1H), 1.65–1.46 (m, 4H), 0.91 (d,  $J = 6.8$  Hz, 3H), 0.86 (d,  $J = 6.7$  Hz, 3H).

$^{13}C$  NMR (125 MHz,  $CDCl_3$ )  $\delta$  207.3, 149.3, 117.4, 44.9, 44.2, 44.1, 39.6, 34.0, 32.8, 30.7, 24.0, 21.0, 18.4.

**HRMS** (EI) ( $m/z$ ): calculated for  $C_{13}H_{21}O_1Cl_1 [M]^+$ : 228.1275; found 228.1277.

$[\alpha]_D^{25} = 15$  ( $c = 0.55$ ,  $CDCl_3$ )

**GC**: The enantiomeric ratio was measured by GC analysis on a chiral column (BGB 176 column: 25.0 m; i.D. 0.25 mm). Temperature: 350 °C (detector), 80 °C (Oven, 3 min, iso) to 150 °C (20 °C/min, 5 min iso) to 180 °C (15 °C/min, 20 min iso); Gas:  $H_2$  (0.5 bar);  $t_R = 24.94$  min (minor),  $t_R = 25.67$  min (major), e.r. = 6:94.

(3*S*,4*S*)-4-isopropyl-2-methylene-3-phenethylcyclopentan-1-one (**2k**)

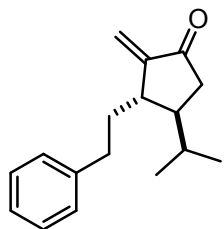

Divinyl ketone **1k** (48 mg, 0.18 mmol) was subjected to the general procedure. 5 Å molecular sieves were used. After 15 days, the reaction had reached 93% conversion. <sup>1</sup>H NMR yield of this mixture was measured with Ph<sub>3</sub>CH as an internal standard (77%). The regioisomeric ratio was 12:1. The residue was purified by chromatography on silica-gel to afford **2k** (35 mg, 0.13 mmol, 72%) as a colorless oil.

<sup>1</sup>H NMR (500 MHz, CDCl<sub>3</sub>) δ 7.33–7.24 (m, 2H), 7.23–7.16 (m, 3H), 6.07 (d, *J* = 2.2 Hz, 1H), 5.31 (dd, *J* = 2.3, 0.9 Hz, 1H), 2.77–2.59 (m, 3H), 2.45 (dd, *J* = 18.7, 8.6 Hz, 1H), 2.20 (dd, *J* = 18.8, 5.9 Hz, 1H), 1.90 (m, 1H), 1.83 (ddd, *J* = 14.0, 7.0, 3.5 Hz, 1H), 1.75 (pd, *J* = 6.8, 5.4 Hz, 1H), 0.91 (d, *J* = 6.8 Hz, 3H), 0.83 (d, *J* = 6.7 Hz, 3H).

<sup>13</sup>C NMR (125 MHz, CDCl<sub>3</sub>) δ 207.2, 149.3, 142.0, 128.6, 128.5, 126.1, 117.4, 44.3, 44.0, 39.5, 36.5, 33.1, 30.7, 21.0, 18.3.

[α]<sub>D</sub><sup>25</sup> = 15 (*c* = 0.53, CHCl<sub>3</sub>)

HRMS (EI) (*m/z*): calculated for C<sub>17</sub>H<sub>22</sub>O<sub>1</sub> [M]<sup>+</sup>: 242.1665; found 242.1665.

HPLC: AD-3R, Acetonitrile/water = 50/50, 1 mL/min, 25 °C, 220 nm, t<sub>R</sub> (minor) = 21.91 min; t<sub>R</sub> (major) = 40.97 min, e.r. = 7:93

(*S*)-4-isopropyl-2-methyl-3-phenethylcyclopent-2-en-1-one (**3k**)

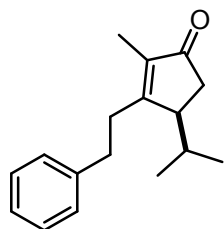

The <sup>1</sup>H NMR yield of regioisomer **3k** is 6 %. After purification, ca 1 mg (isolated yield: 2 %) colorless **3k** product was obtained.

<sup>1</sup>H NMR (500 MHz, CDCl<sub>3</sub>) δ 7.32–7.25 (m, 2H), 7.24–7.16 (m, 3H), 2.93–2.81 (m, 2H), 2.84–2.77 (m, 1H), 2.73 (ddd, *J* = 12.5, 9.1, 6.1 Hz, 1H), 2.56 (ddd, *J* = 13.9, 9.0, 5.5 Hz, 1H), 2.24 (dd, *J* = 18.8, 6.6 Hz, 1H), 2.24–2.15 (m, 1H), 2.13 (dd, *J* = 18.8, 2.3 Hz, 1H), 1.64–1.60 (m, 3H), 1.00 (d, *J* = 6.9 Hz, 3H), 0.59 (d, *J* = 6.9 Hz, 3H).

<sup>13</sup>C NMR (125 MHz, CDCl<sub>3</sub>) δ 209.5, 174.4, 140.8, 137.6, 128.5, 128.2, 126.4, 45.9, 34.8, 33.4, 30.6, 27.7, 21.8, 14.8, 7.9.

**HRMS** (EI) ( $m/z$ ): calculated for  $C_{17}H_{22}O_1$   $[M]^+$ : 242.1665; found 242.1666.

$[\alpha]_D^{25} = -84$  ( $c = 0.1$ ,  $CDCl_3$ )

**HPLC**: AS-H, *isopropanol*/heptane = 2/98, 1 mL/min, 25 °C, 229 nm,  $t_R$  (major) = 22.07 min;  $t_R$  (minor) = 28.68 min, e.r. = 98:2

(3*S*,4*S*)-4-isopropyl-3-methyl-2-methylenecyclopentan-1-one (**2l**)

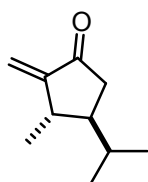

Divinyl ketone **1l** was subjected to the general procedure. 5 Å molecular sieves were used. After 3.5 days, the reaction had reached full conversion.  $^1H$  NMR yield of this mixture was measured with  $Ph_3CH$  as an internal standard (66%). The regiometric ratio was > 20:1. (Note: the product is volatile.)

$^1H$  NMR (500 MHz,  $CDCl_3$ )  $\delta$  6.00 (dd,  $J = 3.2, 0.9$  Hz, 1H), 5.20 (dd,  $J = 2.8, 0.9$  Hz, 1H), 2.54 (ddt,  $J = 9.6, 6.3, 3.1$  Hz, 1H), 2.36 (dd,  $J = 18.2, 7.8$  Hz, 1H), 2.09 (dd,  $J = 18.3, 10.9$  Hz, 1H), 1.95–1.85 (m, 1H), 1.21 (d,  $J = 6.6$  Hz, 3H), 0.96 (d,  $J = 6.8$  Hz, 3H), 0.87 (d,  $J = 6.8$  Hz, 3H).

$^{13}C$  NMR (125 MHz,  $CDCl_3$ )  $\delta$  206.8, 151.4, 116.1, 47.8, 39.2, 39.0, 28.7, 21.8, 18.2, 17.2.

**HRMS** (EI) ( $m/z$ ): calculated for  $C_{10}H_{16}O_1$   $[M]^+$ : 152.1197; found 152.1194.

$[\alpha]_D^{25} = -55.2$  ( $c = 0.5$ ,  $CDCl_3$ )

**GC**: The enantiomeric ratio was measured by GC analysis on a chiral column (BGB 176 column: 25.0 m; i.D. 0.25 mm). Temperature: 350 °C (detector), 100 °C (oven, 40 min, iso) to 230 °C (15 °C/min, 10 min iso); Gas:  $H_2$  (0.5 bar);  $t_R = 23.05$  min (minor),  $t_R = 25.36$  min (major), e.r. = 5:95.

(3*S*,4*R*)-4-(tert-butyl)-3-methyl-2-methylenecyclopentan-1-one (**2m**)

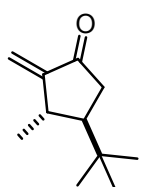

Divinyl ketone **1m** (33 mg, 0.2 mmol) was subjected to the general procedure. 4 Å molecular sieves were used. After 13 days, the reaction had reached full conversion.  $^1H$  NMR yield of this mixture was measured with  $Ph_3CH$  as an internal standard (72 %). The regioisomeric ratio was >20:1. (Note: the product is volatile.)

$^1H$  NMR (500 MHz,  $CDCl_3$ )  $\delta$  5.99 (dd,  $J = 2.7, 0.9$  Hz, 1H), 5.23 (dd,  $J = 2.4, 0.9$  Hz, 1H), 2.76 (t,  $J = 1.2$  Hz, 1H), 2.46 (ddd,  $J = 19.2, 9.2, 1.0$  Hz, 1H), 2.26 (dd,  $J = 19.2, 7.1$  Hz, 1H), 1.66 (ddd,  $J = 9.2, 7.1, 5.7$  Hz, 1H), 1.25 (d,  $J = 7.0$  Hz, 3H), 0.90 (s, 9H).

$^{13}C$  NMR (125 MHz,  $CDCl_3$ )  $\delta$  207.5, 151.7, 116.9, 51.2, 40.0, 37.3, 33.3, 27.8, 23.1.

**HRMS** (ESI) ( $m/z$ ): calculated for  $C_{11}H_{19}O_1$   $[M+H]^+$  167.1430; found 167.1432.

$[\alpha]_{\text{D}}^{25} = 1.2$  ( $c = 0.66$ ,  $\text{CDCl}_3$ )

**GC:** The enantiomeric ratio was measured by GC analysis on a chiral column (BGB 176 column: 25.0 m; i.D. 0.25 mm). Temperature: 350 °C (detector), 80 °C (oven, 3 min, iso) to 130 °C (15 °C/min, 27 min iso); Gas:  $\text{H}_2$  (0.5 bar);  $t_{\text{R}} = 13.46$  min (minor),  $t_{\text{R}} = 14.73$  min (major), e.r. = 3:97.

(3*S*,4*R*)-4-(2-bromophenyl)-3-ethyl-2-methylenecyclopentan-1-one (**2n**)

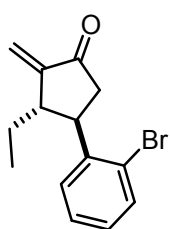

Divinyl ketone **1n** (56 mg, 0.2 mmol) was subjected to the general procedure. 4 Å molecular sieves were used. After 5 days, the reaction had reached 97% conversion.  $^1\text{H}$  NMR yield of this mixture was measured with  $\text{Ph}_3\text{CH}$  as an internal standard (71%). The regioisomeric ratio was >20:1. The residue was purified by chromatography on silica-gel to afford **2n** (29 mg, 0.103 mmol, 53%).

The isolated yield was poor due to a technical mistake.

$^1\text{H}$  NMR (500 MHz,  $\text{CDCl}_3$ )  $\delta$  7.58 (dd,  $J = 8.0, 1.3$  Hz, 1H), 7.28 (td,  $J = 7.6, 1.4$  Hz, 1H), 7.19 (dd,  $J = 7.8, 1.7$  Hz, 1H), 7.13–7.04 (m, 1H), 6.16 (dd,  $J = 2.8, 0.9$  Hz, 1H), 5.33 (dd,  $J = 2.4, 0.9$  Hz, 1H), 3.65 (q,  $J = 7.8$  Hz, 1H), 2.94–2.83 (m, 2H), 2.38 (dd,  $J = 18.6, 7.9$  Hz, 1H), 1.75 (dtd,  $J = 14.9, 7.4, 5.7$  Hz, 1H), 1.65 (dt,  $J = 14.1, 7.1$  Hz, 1H), 0.92 (t,  $J = 7.4$  Hz, 3H).

$^{13}\text{C}$  NMR (125 MHz,  $\text{CDCl}_3$ )  $\delta$  205.7, 147.7, 142.8, 133.3, 128.3, 128.1, 127.2, 125.2, 118.3, 49.4, 44.8, 43.1, 25.9, 11.2.

**HRMS** (EI) ( $m/z$ ): calculated for  $\text{C}_{14}\text{H}_{15}\text{O}_1\text{Br}_1$   $[\text{M}]^+$ : 278.0301; found 278.0303.

$[\alpha]_{\text{D}}^{25} = -16$  ( $c = 0.44$ ,  $\text{CHCl}_3$ )

**HPLC:** AS-H, isopropanol/heptane = 1.3/98.7, 0.8 mL/min, 25 °C, 230 nm,  $t_{\text{R}}$  (minor) = 13.84 min;  $t_{\text{R}}$  (major) = 15.34 min, e.r. = 12:88



## Determination<sup>5</sup> of the absolute configuration of enone **2n**

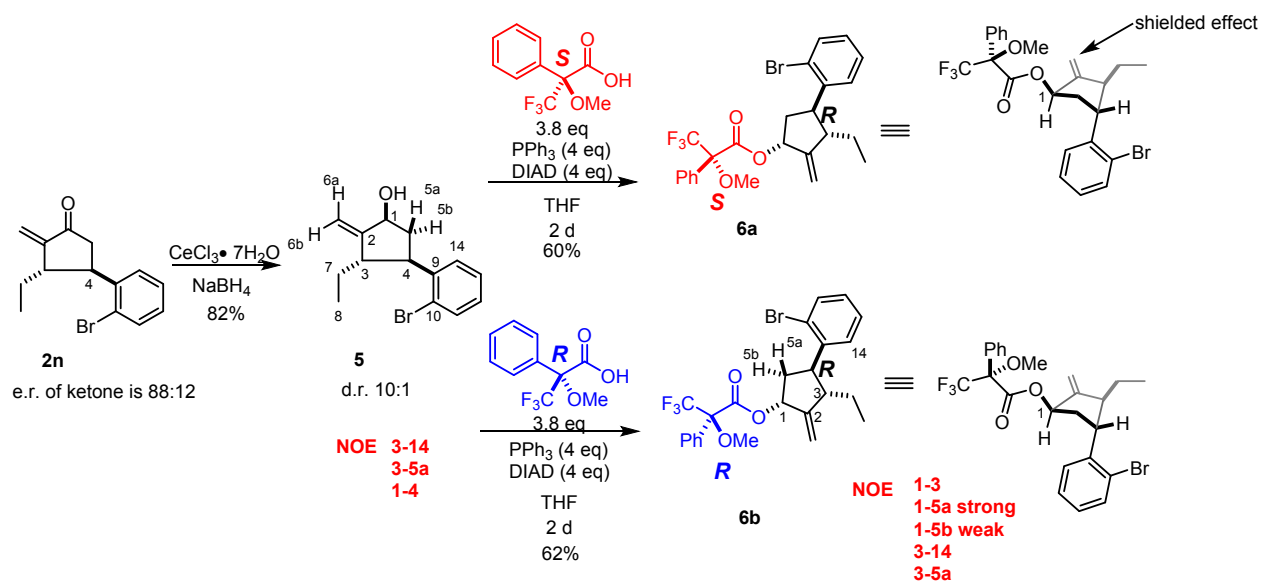

**Scheme 3.** Preparation of Mosher's ester **6a** and **6b**

Experimental: To a solution of **2n** (18 mg, 0.065 mmol) in MeOH (1 mL) was added CeCl<sub>3</sub>•7H<sub>2</sub>O (24 mg, 0.065 mmol, 1 equiv). The mixture was cooled to 0 °C and NaBH<sub>4</sub> (2.4 mg, 0.065 mmol, 1 equiv) was added. The reaction was stirred until the starting material was consumed (as monitored by TLC) and subsequently quenched with water (1 mL) followed by dilution with diethyl ether (5 mL). The organic layer was separated, and the aqueous layer was extracted with diethyl ether (3 x 5 mL). The organic layers were combined, dried over anhydrous MgSO<sub>4</sub>, and concentrated *in vacuo*. The resulting residue was purified by column chromatography to give **5** (15 mg, 82%) following removal of the solvent under reduced pressure. To a solution of **5** (7.5 mg, 0.027 mmol) in dry THF (0.5 mL) was added triphenylphosphine (26.9 mg, 0.12 mmol, 4.5 equiv) and *S*-Mosher's acid (25 mg, 0.11 mmol, 4 equiv). The reaction mixture was cooled to 0 °C, and to this solution diisopropyl azodicarboxylate (DIAD, 24 mg, 0.12 mmol, 4 equiv) was added dropwise. The mixture was then allowed to warm to room temperature and was stirred for 2 days. The volatiles were then removed *in vacuo*. A crude <sup>1</sup>H NMR of resulting residue was performed, and the mixture was purified by column on silica-gel to give *S*-Mosher's ester **6a** (8 mg, 0.016 mmol, 60%, d.r. 7:1 from 76% e.e. of **2n**).

The *R*-Mosher's ester **6b** was prepared by similar procedure (8.2 mg, 0.017 mmol, 62%).

*S*-Mosher's ester **6a**

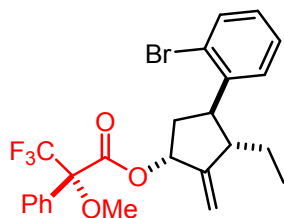

**<sup>1</sup>H NMR** (500 MHz, CDCl<sub>3</sub>) δ 7.61–7.53 (m, 2H), 7.43–7.37 (m, 3H), 7.31–7.20 (m, 3H), 7.07 (t, *J* = 1.0 Hz, 1H), 5.86 (dd, *J* = 5.4, 1.4 Hz, 1H), 5.47 (dd, *J* = 2.7, 1.0 Hz, 1H), 5.19 (dd, *J* = 2.4, 1.1 Hz, 1H), 3.67 (ddt, *J* = 13.4, 10.2, 6.7 Hz, 1H), 3.59 (s, 3H), 2.68 (dtd, *J* = 9.2, 5.8, 2.7 Hz, 1H), 2.33 (ddd, *J* = 14.2, 6.7, 1.5 Hz, 1H), 1.91 (ddd, *J* = 14.1, 11.3, 5.5 Hz, 1H), 1.59–1.48 (m, 2H), 0.72 (t, *J* = 7.4 Hz, 3H).

**<sup>13</sup>C NMR** (125 MHz, CDCl<sub>3</sub>) δ 166.0, 151.3, 142.5, 133.0, 129.5, 128.4, 127.9, 127.8, 127.5, 125.2, 114.3, 79.0, 50.4, 46.5, 40.1, 30.3, 29.7, 25.4, 10.64.

**<sup>19</sup>F NMR** (470 MHz, CDCl<sub>3</sub>) δ –71.62.

**HRMS** (ESI) (*m/z*): calculated for C<sub>24</sub>H<sub>24</sub>O<sub>3</sub>F<sub>3</sub>Br<sub>1</sub>Na<sub>1</sub> [M+Na]<sup>+</sup>: 519.0753; found 519.0756.

*R*-Mosher's ester **6b**

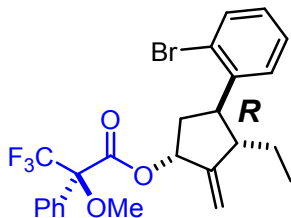

**<sup>1</sup>H NMR** (500 MHz, CDCl<sub>3</sub>) δ 7.59–7.55 (m, 2H), 7.54 (dd, *J* = 8.0, 1.3 Hz, 2H), 7.44–7.36 (m, 3H), 7.30–7.14 (m, 1H), 7.06 (ddd, *J* = 8.0, 6.9, 2.0 Hz, 1H), 5.87 (dd, *J* = 5.5, 1.4 Hz, 1H), 5.52 (dd, *J* = 2.7, 1.0 Hz, 1H), 5.24 (dd, *J* = 2.4, 1.1 Hz, 1H), 3.71–3.60 (m, 1H), 3.57 (s, 3H), 2.76–2.60 (m, 1H), 2.25 (ddd, *J* = 14.1, 6.6, 1.6 Hz, 1H), 1.88 (ddd, *J* = 14.2, 11.2, 5.4 Hz, 1H), 1.61–1.56 (m, 2H), 0.78 (t, *J* = 7.4 Hz, 3H).

**<sup>13</sup>C NMR** (125 MHz, CDCl<sub>3</sub>) δ 166.0, 151.6, 142.5, 133.0, 129.5, 128.4, 127.9, 127.7, 127.5, 127.4, 125.3, 114.3, 79.1, 55.4, 50.5, 46.5, 40.1, 29.7, 25.4, 10.7.

**<sup>19</sup>F NMR** (470 MHz, CDCl<sub>3</sub>) δ –71.49.

**HRMS** (ESI) (*m/z*): calculated for C<sub>24</sub>H<sub>24</sub>O<sub>3</sub>F<sub>3</sub>Br<sub>1</sub>Na<sub>1</sub> [M+Na]<sup>+</sup>: 519.0753; found 519.0756.



# $^1\text{H}$ NMR difference between (*S*)-MTPA ester and (*R*)-MTPA ester

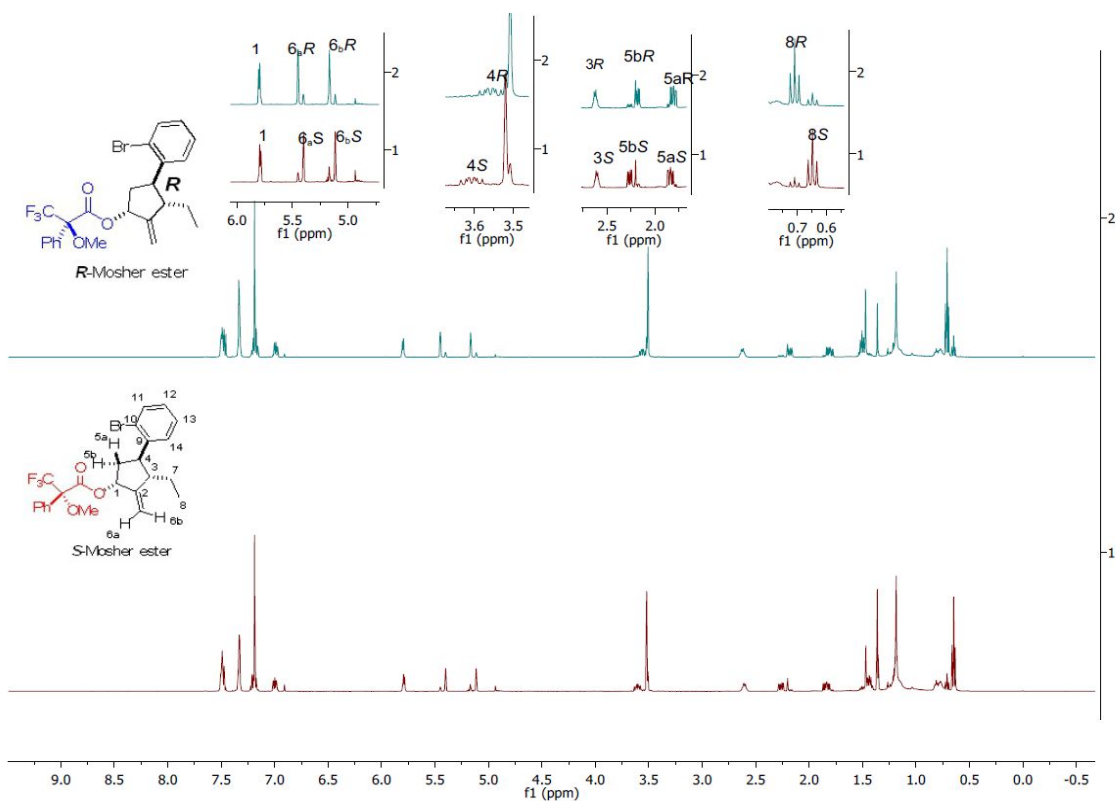

OU-OA-766-R-P-H.10.fid - 2

# $^{19}\text{F}$ NMR difference between (*S*)-MTPA ester and (*R*)-MTPA ester

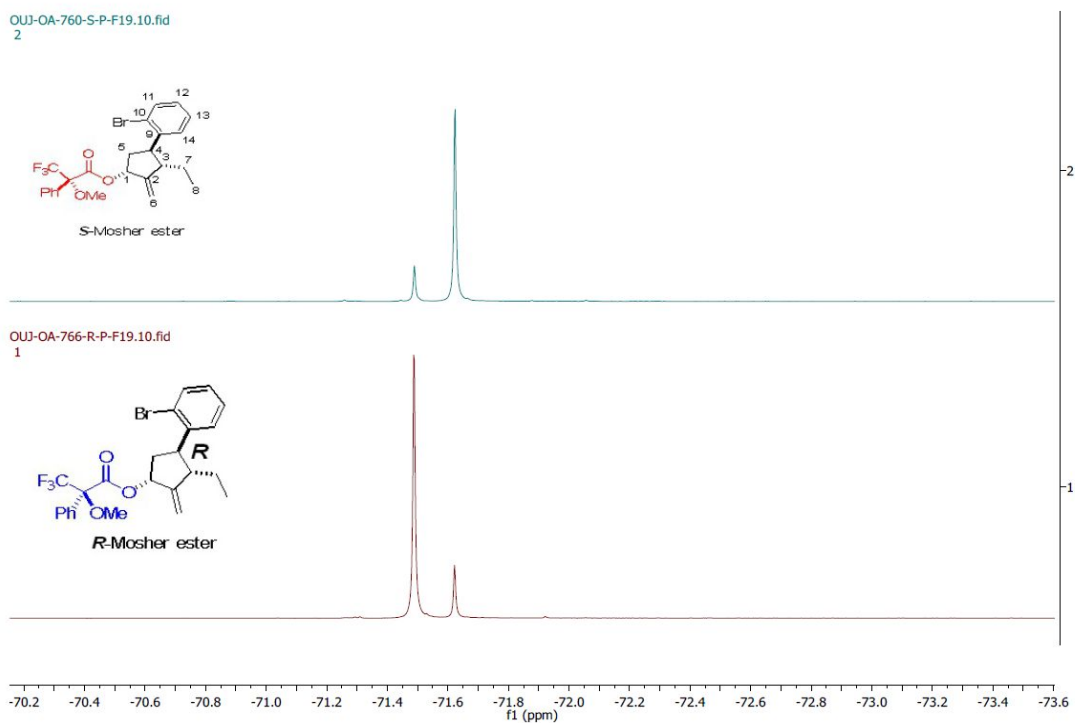

# Alcohol 5 COSY and NOE

674-alcohol cosy noe.1.fid  
 OUJ-OA-674-01  
 5mm, CDCl<sub>3</sub>, 10mg  
 1H(of) (zg30) @ 298.0 K  
 Av600a, TBI  
 20.03.2018

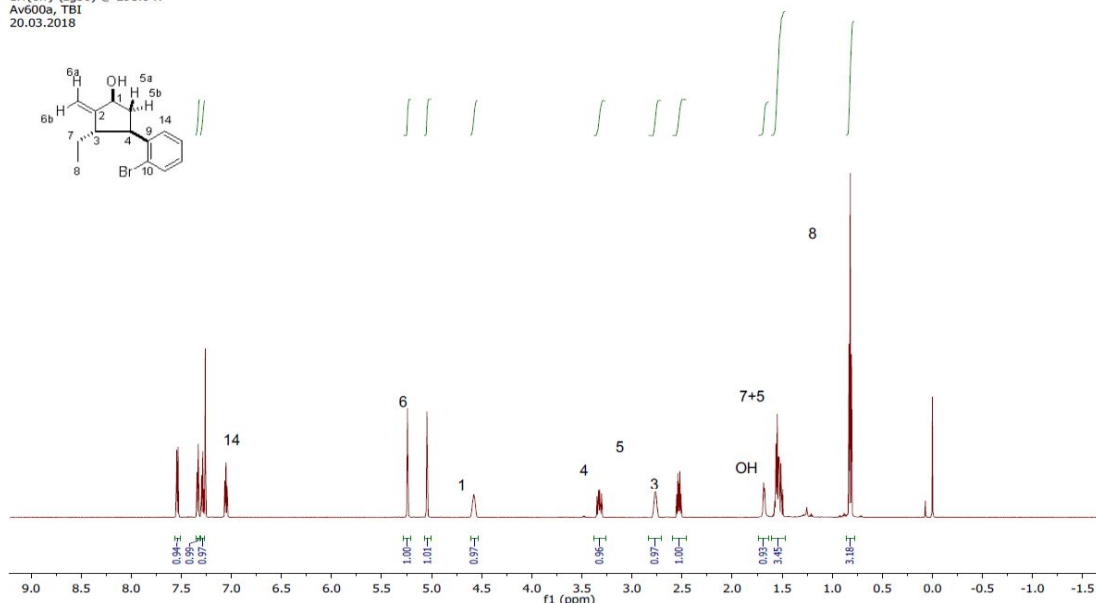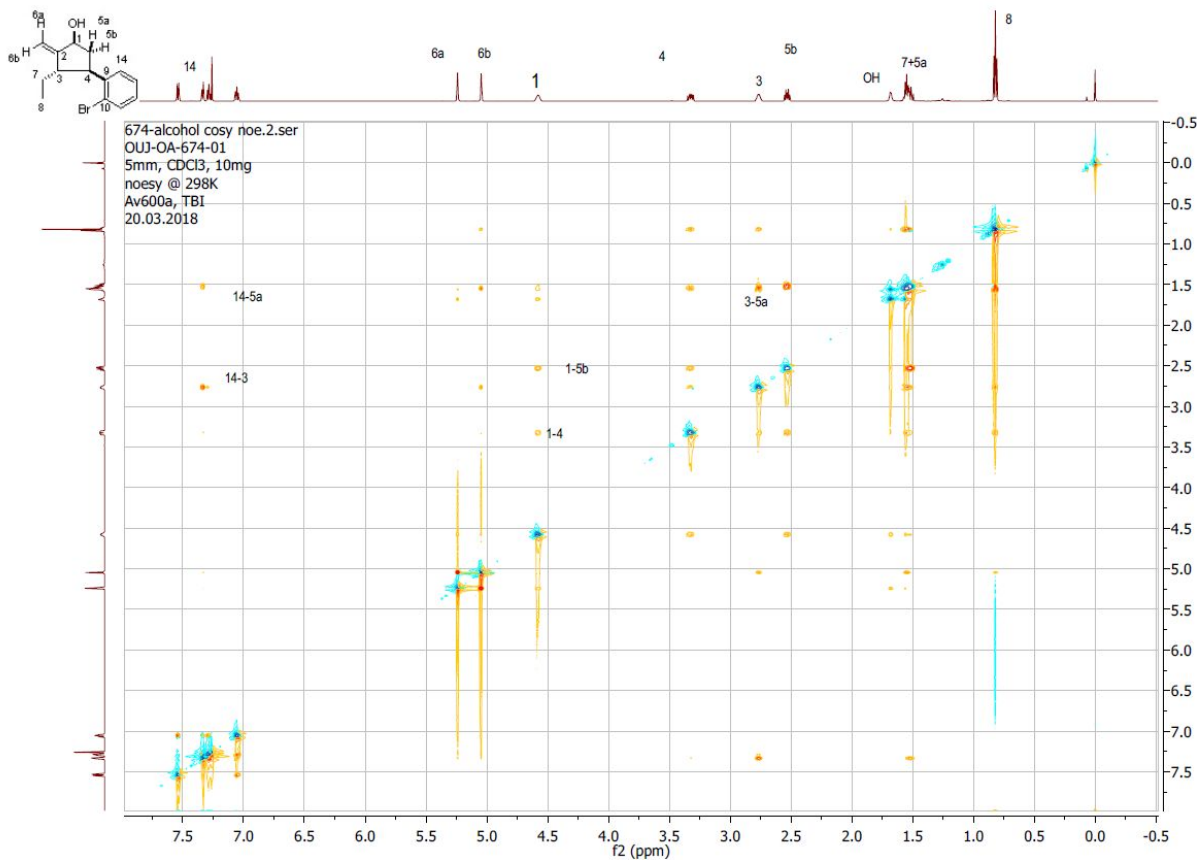

R-Mosher' ester **6b** H-H COSY and H-H NOESY

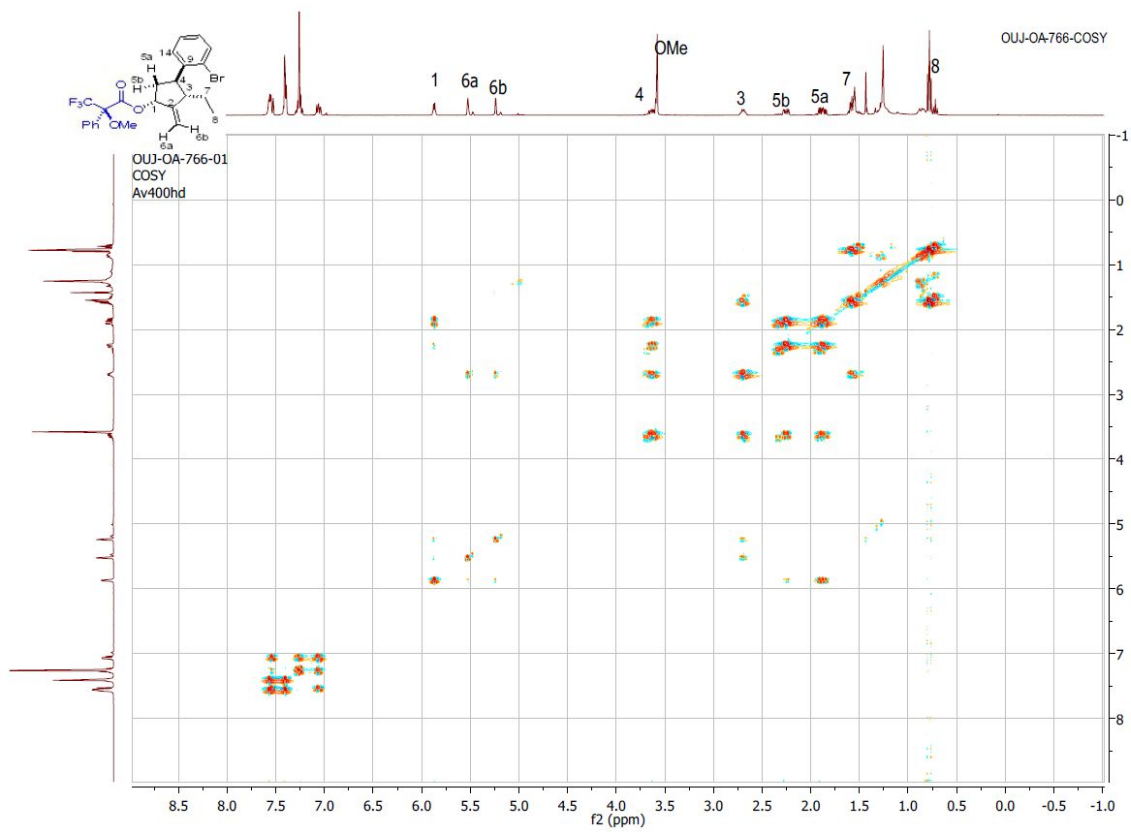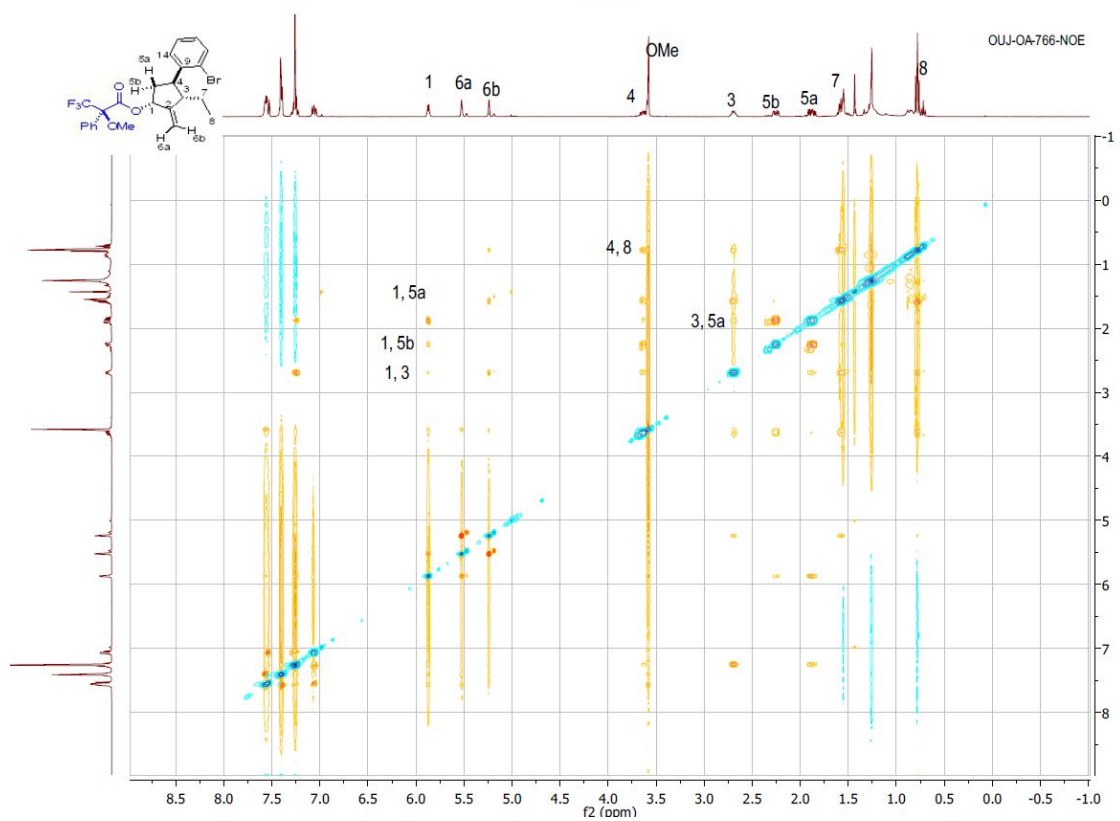

$^{13}\text{C}$  NMR (125 MHz,  $\text{CDCl}_3$ ) of **6a**

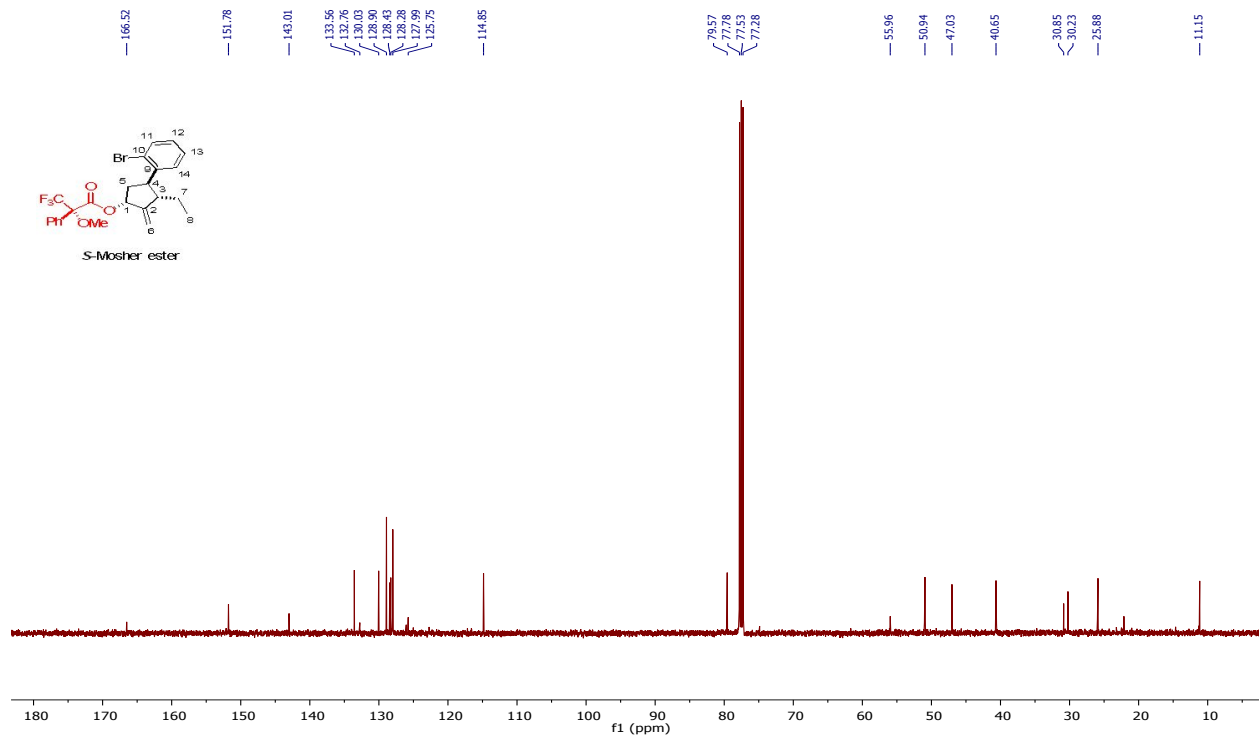

$^{13}\text{C}$  NMR (125 MHz,  $\text{CDCl}_3$ ) of **6b**

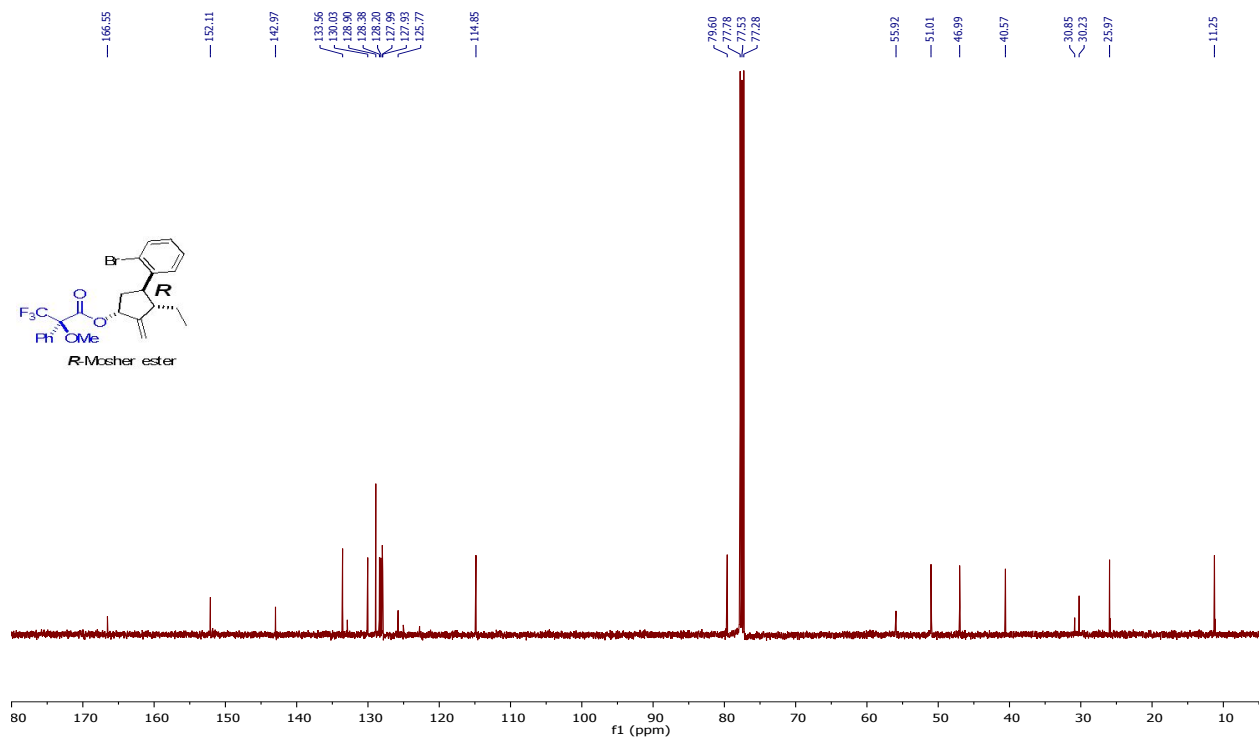

## Functionalization of 2a

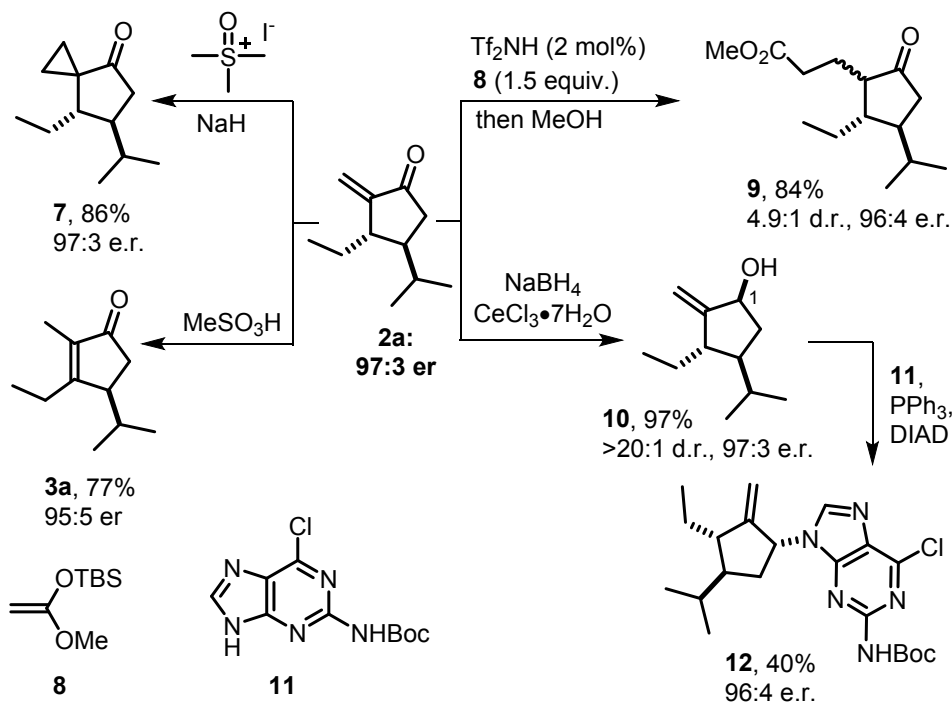

Scheme 4. Functionalization of **2a**

(6*S*,7*S*)-7-ethyl-6-isopropylspiro[2.4]heptan-4-one (**7**)

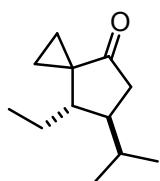

To a solution of trimethyloxosulfonium iodide (13 mg, 0.06 mmol) in dry THF (0.2 mL) was added NaH (60% mineral oil dispersion, 2.9 mg, 1.2 equiv) under Ar, followed by addition of anhydrous DMSO (0.4 mL). After stirring for nearly 30 min at room temperature, the mixture was clear and gas evolution had ceased. The mixture was cooled to 0 °C. After addition of a solution of **2c** (10 mg, 0.06 mmol) in DMSO (0.2 mL), the solution was warmed to room temperature with vigorous stirring for another 20 min and then quenched with NH<sub>4</sub>Cl (sat. aq., 1 mL), followed by addition of diethyl ether (2 mL). The organic phase was separated and the aqueous layer was extracted with diethyl ether (3 x 5 mL). All organic portions were combined and washed with brine (3 x 5 mL) to remove DMSO, dried over MgSO<sub>4</sub>, filtered, and the solvent was removed *in vacuo* to give a colorless residue, which was further purified by flash chromatography on silica-gel to provide **7** (9.3 mg, 86%).

<sup>1</sup>H NMR (500 MHz, CDCl<sub>3</sub>) δ 2.36 (dd, *J* = 18.6, 8.6 Hz, 1H), 2.14 (dd, *J* = 18.6, 5.7 Hz, 1H), 1.89 (dtd, *J* = 8.6, 5.7, 4.6 Hz, 1H), 1.79 (dt, *J* = 7.3, 5.1 Hz, 1H), 1.76–1.70 (m, 1H), 1.34–1.25



(m, 2H), 1.09 (ddd,  $J = 9.8, 6.9, 2.9$  Hz, 1H), 1.05–1.00 (m, 1H), 0.95 (ddd,  $J = 9.3, 6.8, 3.7$  Hz, 1H), 0.87 (d,  $J = 6.8$  Hz, 3H), 0.83 (d,  $J = 6.7$  Hz, 3H), 0.82 (t,  $J = 7.5$  Hz, 3H), 0.78–0.69 (m, 1H).

$^{13}\text{C}$  NMR (125 MHz,  $\text{CDCl}_3$ )  $\delta$  220.1, 45.0, 45.0, 40.1, 34.2, 30.4, 25.6, 21.3, 20.3, 18.8, 14.1, 11.9.

$[\alpha]_{\text{D}}^{25} = 34.7$  ( $c = 0.45$ ,  $\text{CDCl}_3$ )

**HRMS** (ESI) ( $m/z$ ): calculated for  $\text{C}_{12}\text{H}_{30}\text{O}_1\text{Na}_1$   $[\text{M}+\text{Na}]^+$  203.1406; found 203.1407.

**GC**: The enantiomeric ratio was measured by GC analysis on a chiral column (BGB 176 column: 25.0 m; i.D. 0.25 mm). Temperature: 350 °C (detector), 80 °C (oven, 3 min, iso) to 130 °C (15 °C/min, 27 min iso); Gas:  $\text{H}_2$  (0.5 bar);  $t_{\text{R}} = 19.45$  min (minor),  $t_{\text{R}} = 20.14$  min (major), e.r. = 3:97.

(*S*)-3-ethyl-4-isopropyl-2-methylcyclopent-2-en-1-one (**3a**)

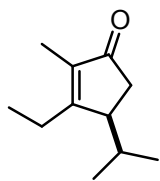

To a solution of **2a** (8.7 mg, 0.052 mmol) in anhydrous DCM (1 mL) was added methanesulfonic acid (18.5 mg, 0.19 mmol, 3.6 equiv) at room temperature. The solution was stirred for 3 h and then quenched with *N,N*-diisopropylethylamine (50  $\mu\text{L}$ ). The reaction mixture was directly purified by column chromatography on silica-gel ( $\text{Et}_2\text{O}$ : pentane=1:10 to 1:6) to give **3a** (6.7 mg, 77%) as a colorless oil.

$^1\text{H}$  NMR (500 MHz,  $\text{CDCl}_3$ )  $\delta$  2.80 (broad, 1H), 2.47 (dd,  $J = 14.1, 7.3$  Hz, 1H), 2.26–2.13 (m, 2H), 2.13–2.00 (m, 2H), 1.63 (d,  $J = 1.8$  Hz, 3H), 1.04 (td,  $J = 7.7, 1.4$  Hz, 3H), 0.93 (dd,  $J = 6.9, 1.4$  Hz, 3H), 0.51 (dd,  $J = 6.9, 1.5$  Hz, 3H).

$^{13}\text{C}$  NMR (125 MHz,  $\text{CDCl}_3$ )  $\delta$  209.8, 177.3, 136.6, 45.7, 34.9, 27.7, 22.0, 14.9, 11.8, 8.0. (One missing carbon overlapped at 22.0 ppm)

**GC**: The enantiomeric ratio was measured by GC analysis on a chiral column (BGB 176 column: 25.0 m; i.D. 0.25mm). Temperature: 350 °C (detector), 80 °C (oven, 3 min, iso) to 130 °C (15 °C/min, 27 min iso); Gas:  $\text{H}_2$  (0.5 bar);  $t_{\text{R}} = 17.00$  min (minor),  $t_{\text{R}} = 18.71$  min (major), e.r. = 5:95.

**HRMS** (EI) ( $m/z$ ): calculated for  $\text{C}_{11}\text{H}_{18}\text{O}_1$   $[\text{M}]^+$  166.1352; found 166.1355.

$[\alpha]_{\text{D}}^{25} = 9.5$  ( $c = 0.4$ ,  $\text{CDCl}_3$ )

Methyl 3-((2*S*,3*S*)-2-ethyl-3-isopropyl-5-oxocyclopentyl)propanoate (**9**)

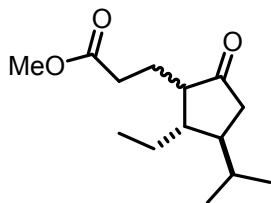

To a solution of **2a** (13 mg, 0.078 mmol) in dry Et<sub>2</sub>O was added silyl ketene acetal **8** (22 mg, 0.12 mmol, 1.5 equiv) under Ar. After cooling the solution to -78 °C, Tf<sub>2</sub>NH (0.1 M in CHCl<sub>3</sub>, 16 μL, 2 mol%) was added.

The mixture stirred for 10 min at this temperature and was then quenched with MeOH (0.5 mL), and concentrated at 35 °C to afford a colorless residue, which was purified by column on silica-gel to afford **9** (16 mg, 84%, d.r. 83:17).

**<sup>1</sup>H NMR** (500 MHz, CDCl<sub>3</sub>) δ 3.66 (s, 3H), 2.55 (ddd, *J* = 16.2, 9.0, 5.7 Hz, 1H), 2.44 (ddd, *J* = 16.1, 8.9, 6.9 Hz, 1H), 2.30–2.21 (m, 1H), 1.99–1.84 (m, 3H), 1.82–1.71 (m, 1H), 1.68–1.51 (m, 3H), 0.97–0.90 (m, 8H), 0.82 (d, *J* = 6.8 Hz, 3H).

**<sup>13</sup>C NMR** (125 MHz, CDCl<sub>3</sub>) δ 218.7, 172.9, 52.7, 52.0, 44.8, 44.3, 39.2, 31.2, 28.0, 26.1, 25.0, 23.8, 22.6, 16.7.

**GC:** The enantiomeric ratio was measured by GC analysis on a chiral column (C-DEXTRIN H G632: 25.0 m; i.D. 0.25 mm). Temperature: 230 °C (injector), 350 °C (detector), 100 °C (0.3 min, iso) to 150 °C (9 min iso); Gas: H<sub>2</sub> (0.4 bar); for major diastereoisomer *t*<sub>R</sub> = 85.13 min (minor), *t*<sub>R</sub> = 86.85 min (major), e.r. = 4:96, for minor diastereoisomer *t*<sub>R</sub> = 90.04 min (minor), *t*<sub>R</sub> = 90.54 min (major), e.r. = 4:96.

**HRMS** (ESI) (*m/z*): calculated for C<sub>14</sub>H<sub>24</sub>O<sub>3</sub>Na<sub>1</sub> [M+Na]<sup>+</sup> 263.1617; found 263.1619.

(1*S*,3*S*,4*S*)-3-ethyl-4-isopropyl-2-methylenecyclopentan-1-ol (**10**)

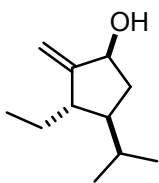

To a solution of **2a** (15 mg, 0.09 mmol) in MeOH (1 mL) was added CeCl<sub>3</sub>•7H<sub>2</sub>O (33.6 mg, 0.09 mmol, 1 equiv). The solution was cooled in a dry ice bath for 10 min, and then NaBH<sub>4</sub> (4 mg, 0.11 mmol, 1.2 equiv) was added. The mixture was stirred for 20 min until the **2a** was consumed (as monitored by TLC) and was then

quenched with water (1 mL) and diluted with diethyl ether (5 mL). The organic layer was separated and the aqueous layer was extracted with diethyl ether (2 x 3 mL). All organic layers were combined and dried over anhydrous MgSO<sub>4</sub>, filtered, and concentrated. The residue was purified by column chromatography to afford **10** (15 mg, 97%)

**<sup>1</sup>H NMR** (500 MHz, CDCl<sub>3</sub>) δ 5.04 (s, 1H), 4.87 (d, *J* = 2.2 Hz, 1H), 4.44–4.35 (m, 1H), 2.21 (dtq, *J* = 7.0, 4.1, 2.1 Hz, 1H), 2.16 (dt, *J* = 11.9, 6.9 Hz, 1H), 1.67–1.48 (m, 2H, OH), 1.45–1.32

(m, 2H), 1.14 (q,  $J = 11.0$  Hz, 1H), 0.92 (d,  $J = 6.8$  Hz, 3H), 0.88 (t,  $J = 7.4$  Hz, 3H), 0.85 (d,  $J = 6.7$  Hz, 3H).

$^{13}\text{C}$  NMR (125 MHz,  $\text{CDCl}_3$ )  $\delta$  158.3, 105.1, 74.5, 46.9, 45.8, 38.2, 31.9, 28.2, 21.8, 19.2, 11.1.

HRMS (EI) ( $m/z$ ): calculated for  $\text{C}_{11}\text{H}_{20}\text{O}_1$   $[\text{M}]^+$  168.1508; found 168.1508.

$[\alpha]_{\text{D}}^{25} = 64$  ( $c = 0.5$ ,  $\text{CDCl}_3$ )

GC: The enantiomeric ratio was measured by GC analysis on a chiral column (BGB 176 column: 25.0 m; i.D. 0.25 mm). Temperature: 350 °C (detector), 80 °C (oven, 3 min, iso) to 105 °C (15 °C/min, 40 min iso); Gas:  $\text{H}_2$  (0.5 bar);  $t_{\text{R}} = 45.31$  min (minor),  $t_{\text{R}} = 46.41$  min (major), e.r. = 3:97.

*Tert*-butyl(6-chloro-9-((1*R*,3*S*,4*S*)-3-ethyl-4-isopropyl-2-methylenecyclopentyl)-9H-purin-2-yl)carbamate (**12**)

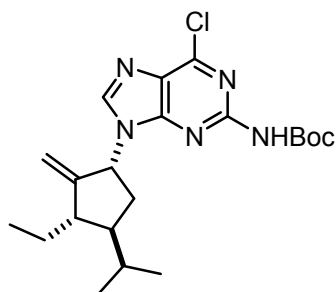

To a solution of **10** (15 mg, 0.089 mmol) in dry THF (1 mL) was added triphenylphosphine (108 mg, 0.41 mmol, 4.5 equiv) and *tert*-butyl (6-chloro-9H-purin-2-yl)carbamate (**11**, 29 mg, 0.11 mmol, 1.2 equiv) under Ar. The reaction mixture was cooled in an ice-water bath, and then diisopropyl azodicarboxylate (72 mg, 0.36 mmol, 4 equiv) was added. The reaction mixture was stirred for 15 min and

warmed to room temperature until **10** was consumed (as monitored by TLC). Subsequently, the mixture was concentrated *in vacuo* and directly purified by column chromatography (ALOX, EtOAc: isohexane = 1:4) to afford **12** (15 mg, 40%) as a white solid.

$^1\text{H}$  NMR (500 MHz,  $\text{CDCl}_3$ )  $\delta$  7.94 (s, 1H), 7.44 (s, 1H), 5.50–5.37 (m, 1H), 5.16 (t,  $J = 2.3$  Hz, 1H), 4.86 (t,  $J = 2.4$  Hz, 1H), 2.38 (tq,  $J = 5.9, 3.0, 2.3$  Hz, 1H), 2.20 (ddd,  $J = 13.7, 8.4, 6.6$  Hz, 1H), 2.03 (dt,  $J = 14.0, 7.4$  Hz, 1H), 1.83 (p,  $J = 6.8$  Hz, 1H), 1.75 (dt,  $J = 13.4, 6.7$  Hz, 1H), 1.71–1.61 (m, 2H), 1.54 (s, 9H), 1.00 (t,  $J = 7.4$  Hz, 3H), 0.95 (d,  $J = 6.7$  Hz, 3H), 0.93 (d,  $J = 6.7$  Hz, 3H).

$^{13}\text{C}$  NMR (125 MHz,  $\text{CDCl}_3$ )  $\delta$  153.4, 153.3, 152.4, 151.2, 150.3, 143.3, 128.0, 125.7, 110.9, 81.7, 57.3, 47.4, 33.6, 30.5, 29.6, 26.1, 21.7, 18.6, 11.3.

$[\alpha]_{\text{D}}^{25} = -18.9$  ( $c = 0.75$ , DCM)

HPLC: AD-3, isopropanol/heptane = 1.5/98.5, 1.1 mL/min, 25 °C, 289 nm,  $t_{\text{R}}$  (major) = 20.26 min;  $t_{\text{R}}$  (minor) = 30.23 min, e.r. = 96:4

**HRMS** (ESI) ( $m/z$ ): calculated for  $C_{21}H_{31}N_5O_2Cl_1$   $[M+H]^+$  420.2161; found 420.2161.

## References

- (1) Liu, L.; Kim, H.; Xie, Y.; Fares, C.; Kaib, P. S. J.; Goddard, R.; List, B., Catalytic Asymmetric [4+2]-Cycloaddition of Dienes with Aldehydes. *J. Am. Chem. Soc.* **2017**, *139*, 13656–13659.
- (2) Kaib, P. S.; Schreyer, L.; Lee, S.; Properzi, R.; List, B., Extremely Active Organocatalysts Enable a Highly Enantioselective Addition of Allyltrimethylsilane to Aldehydes. *Angew. Chem. Int. Ed.* **2016**, *55*, 13200–13203.
- (3) Tsuji, N.; Kennemur, J. L.; Buyck, T.; Lee, S.; Prévost, S.; Kaib, P. S. J.; Bykov, D.; Farès, C.; List, B., Activation of olefins via asymmetric Brønsted acid catalysis. *Science* **2018**, *359*, 1501–1505.
- (4) Huang, J.-R.; Sohail, M.; Taniguchi, T.; Monde, K.; Tanaka, F., Formal (4+1) Cycloaddition and Enantioselective Michael–Henry Cascade Reactions To Synthesize Spiro[4,5]decanes and Spirooxindole Polycycles. *Angew. Chem. Int. Ed.* **2017**, *56*, 5853–5857.
- (5) (a) Hoye, T. R.; Jeffrey, C. S.; Shao, F., Mosher ester analysis for the determination of absolute configuration of stereogenic (chiral) carbinol carbons. *Nature Protocols* **2007**, *2*, 2451–2458; (b) Dhanjee, H. H.; Kobayashi, Y.; Buerger, J. F.; McMahon, T. C.; Haley, M. W.; Howell, J. M.; Fujiwara, K.; Wood, J. L., Total Syntheses of (+)- and (–)-Tetrapetalones A and C. *J. Am. Chem. Soc.* **2017**, *139*, 14901–14904.

# NMR spectra

$^1\text{H}$  NMR (500 MHz,  $\text{CD}_2\text{Cl}_2$ ) and  $^{13}\text{C}$  NMR (125 MHz,  $\text{CD}_2\text{Cl}_2$ ) of diol

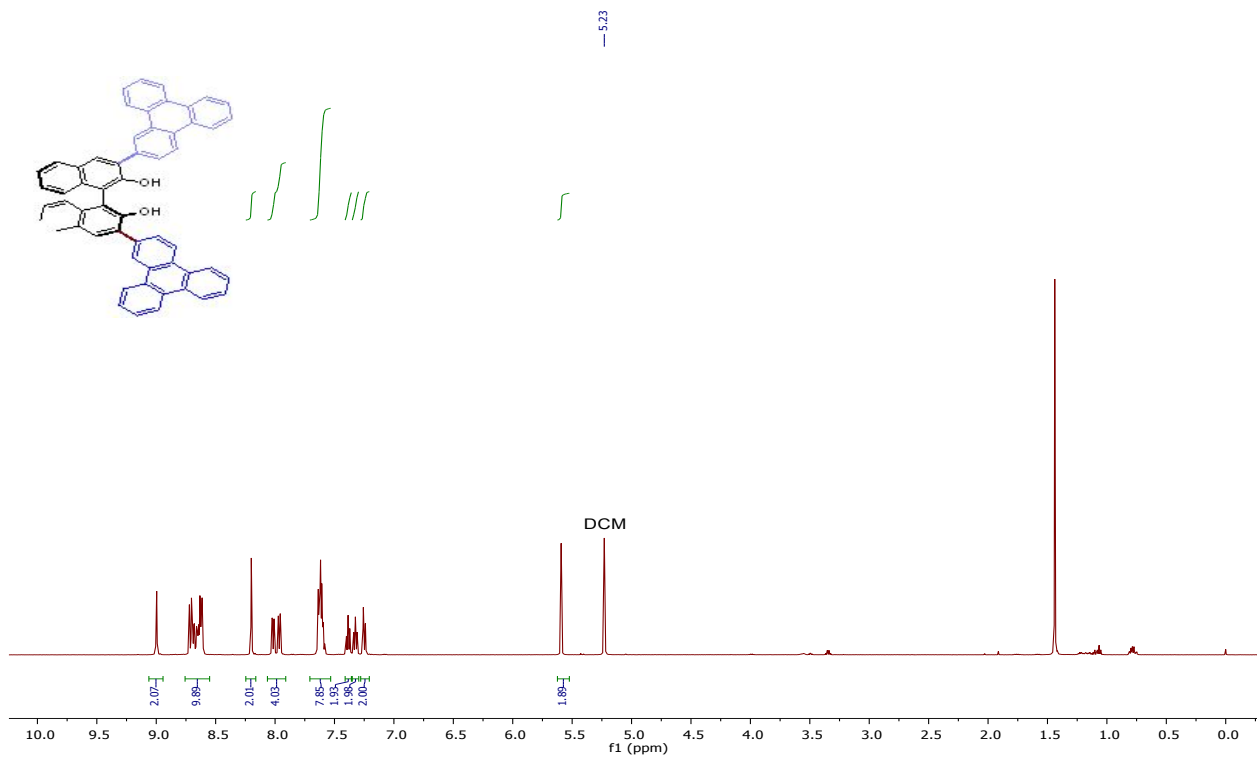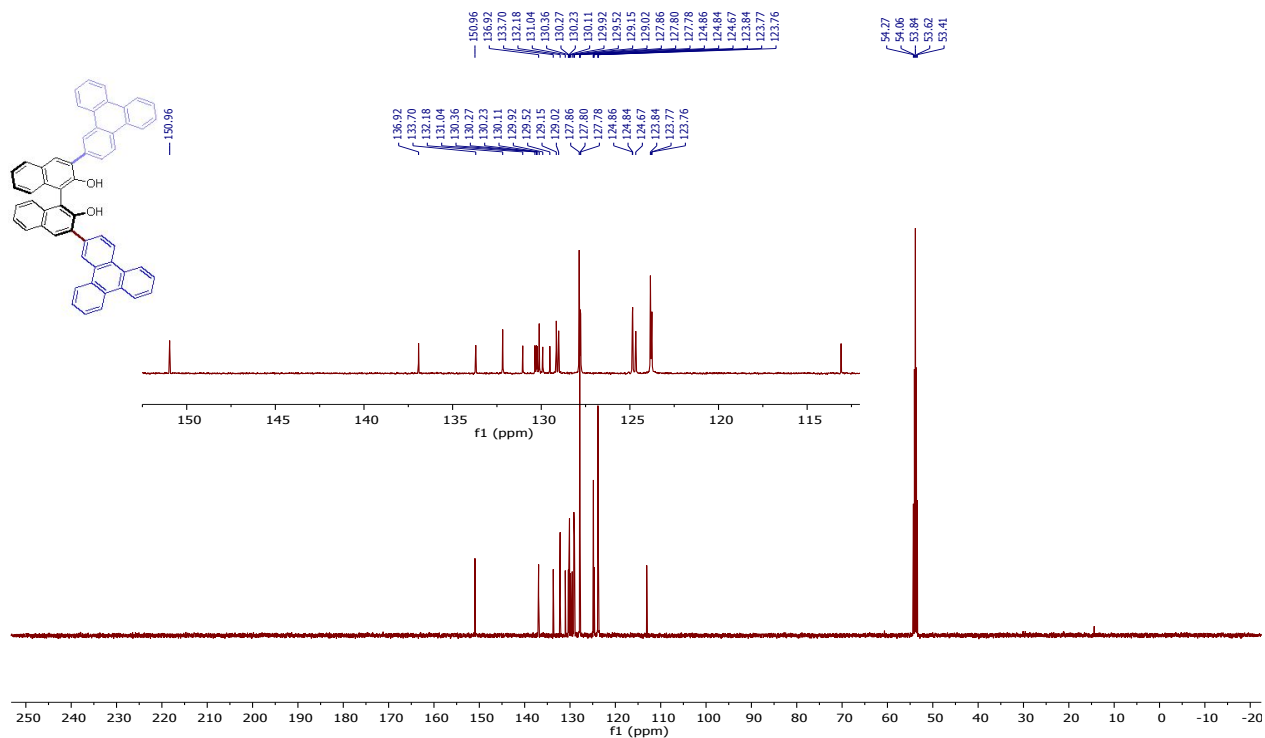

$^1\text{H}$  NMR (500 MHz,  $\text{CD}_2\text{Cl}_2$ ) and  $^{13}\text{C}$  NMR (125 MHz,  $\text{CD}_2\text{Cl}_2$ ) of catalyst **4e**

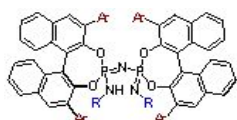

Ar: 2-triphenylene, R:  $\text{SO}_2\text{CF}_3$

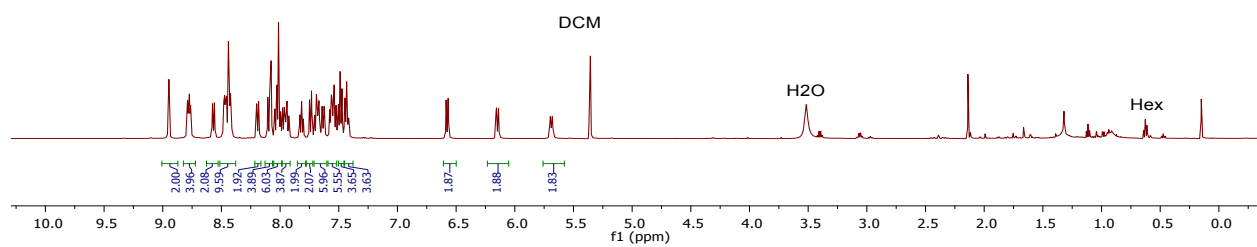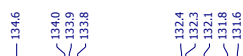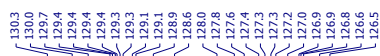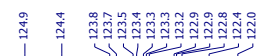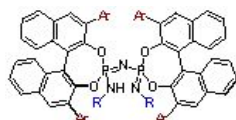

Ar: 2-triphenylene, R:  $\text{SO}_2\text{CF}_3$

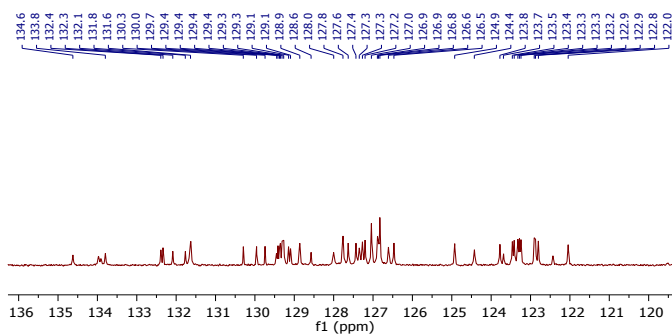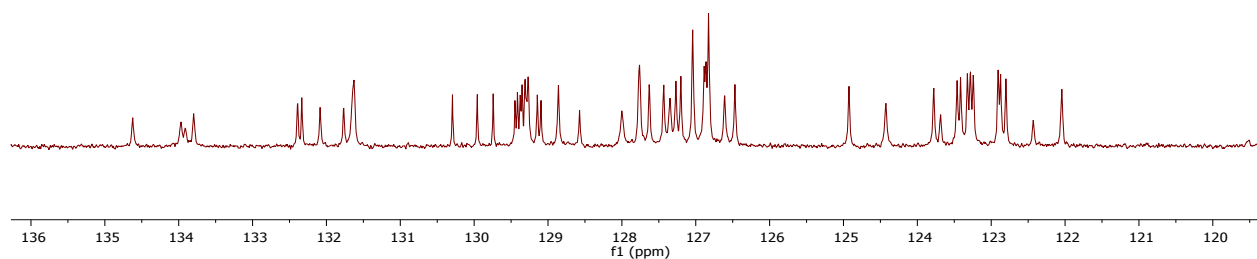

**<sup>31</sup>P NMR (203 MHz, CD<sub>2</sub>Cl<sub>2</sub>) and <sup>19</sup>F NMR (470 MHz, CD<sub>2</sub>Cl<sub>2</sub>) of catalyst **4e****

-14.90

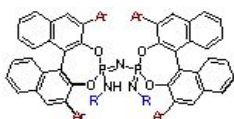

Ar: 2-triphenylene, R: SO<sub>2</sub>CF<sub>3</sub>

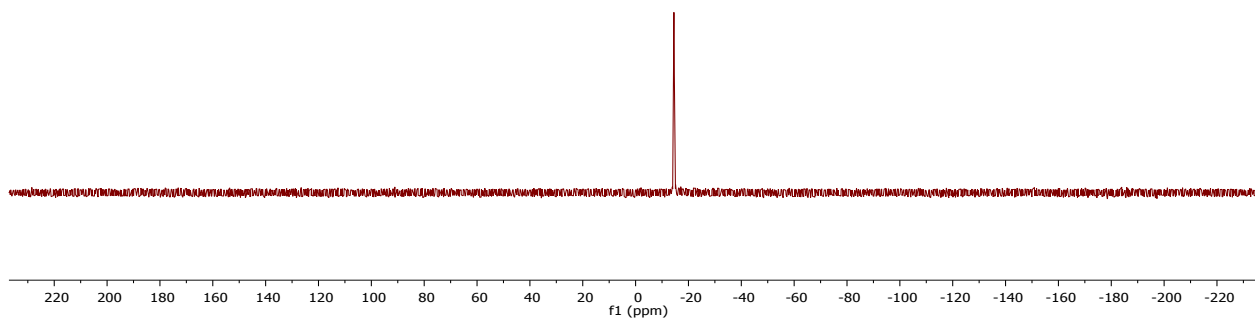

-79.31

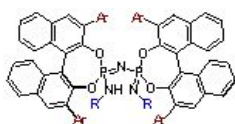

Ar: 2-triphenylene, R: SO<sub>2</sub>CF<sub>3</sub>

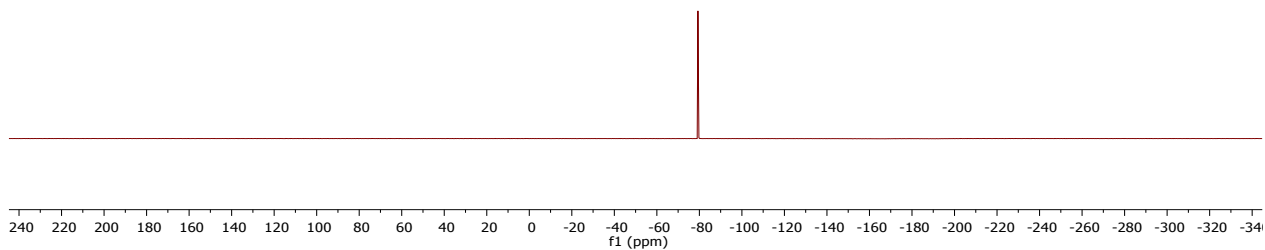





**$^{31}\text{P}$  NMR (203 MHz,  $\text{CD}_2\text{Cl}_2$ ) and  $^{19}\text{F}$  NMR (470 MHz,  $\text{CD}_2\text{Cl}_2$ ) of catalyst **4f****

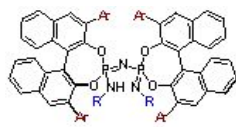

Ar: 2-triphenylene, R:  $\text{SO}_2\text{C}_2\text{F}_5$

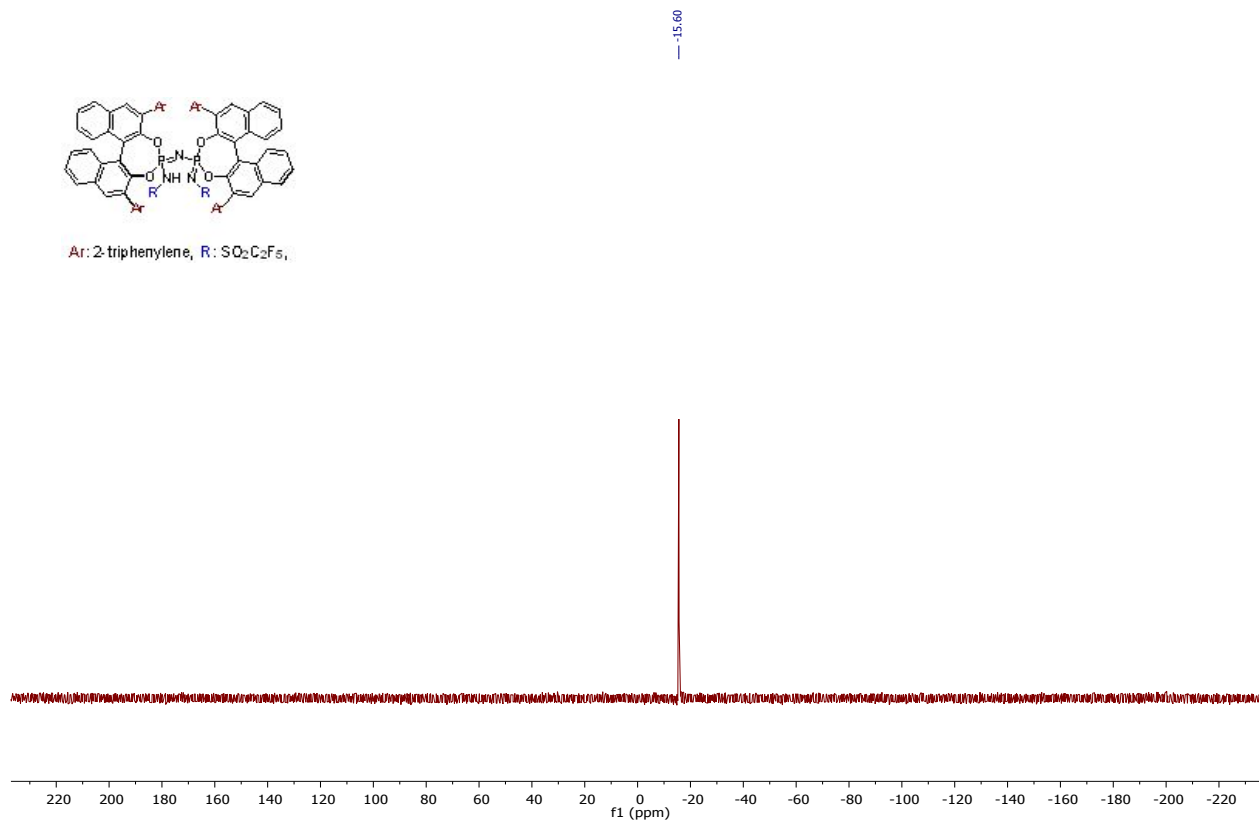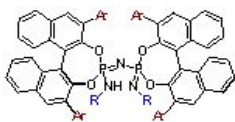

Ar: 2-triphenylene, R:  $\text{SO}_2\text{C}_2\text{F}_5$

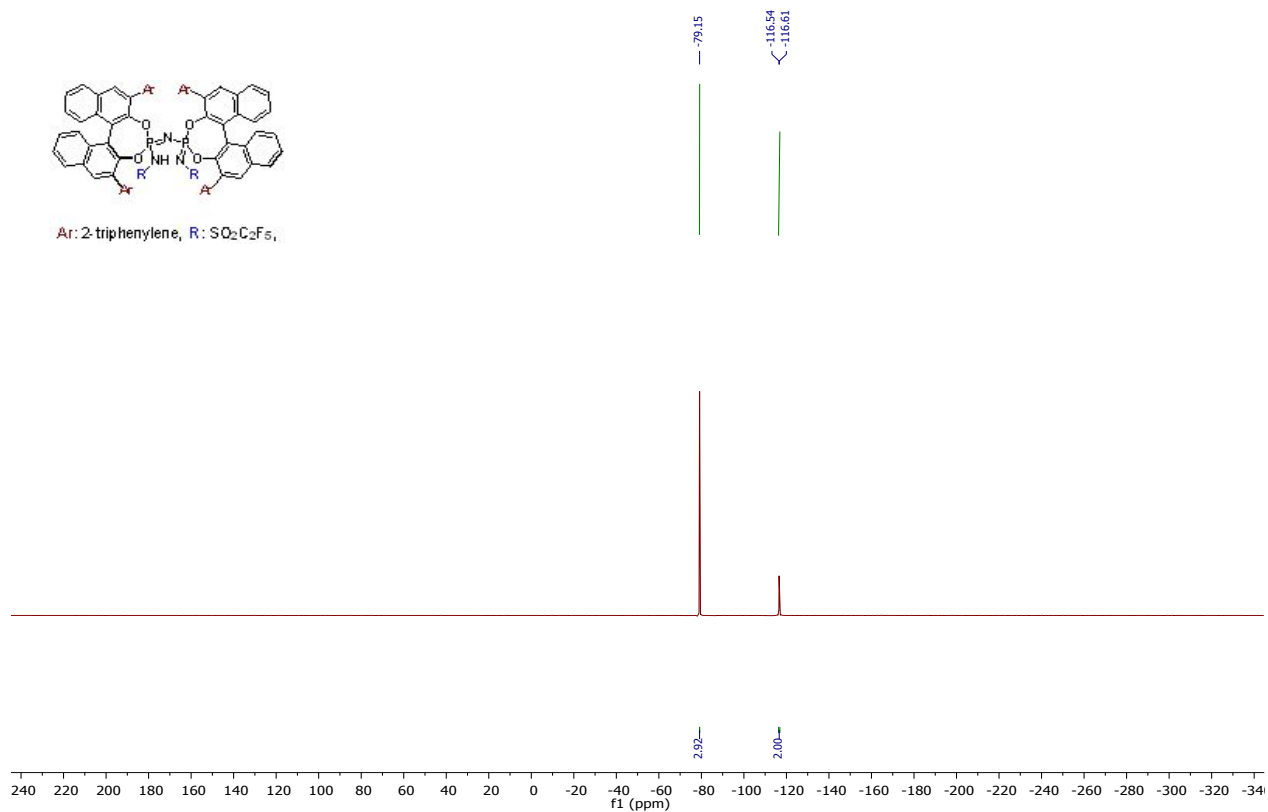

$^1\text{H}$  NMR (500 MHz,  $\text{CD}_2\text{Cl}_2$ ) and  $^{13}\text{C}$  NMR (125 MHz,  $\text{CD}_2\text{Cl}_2$ ) of catalyst **4g**

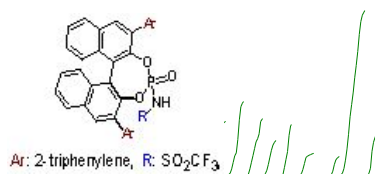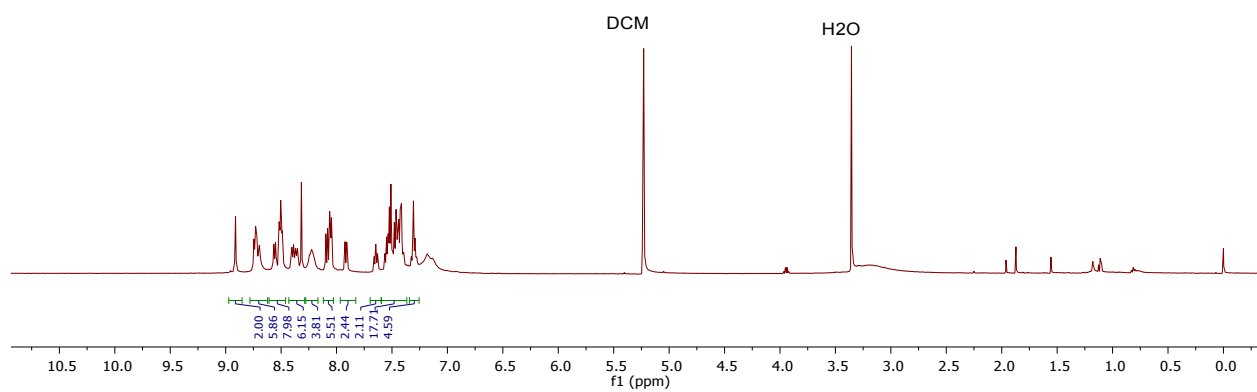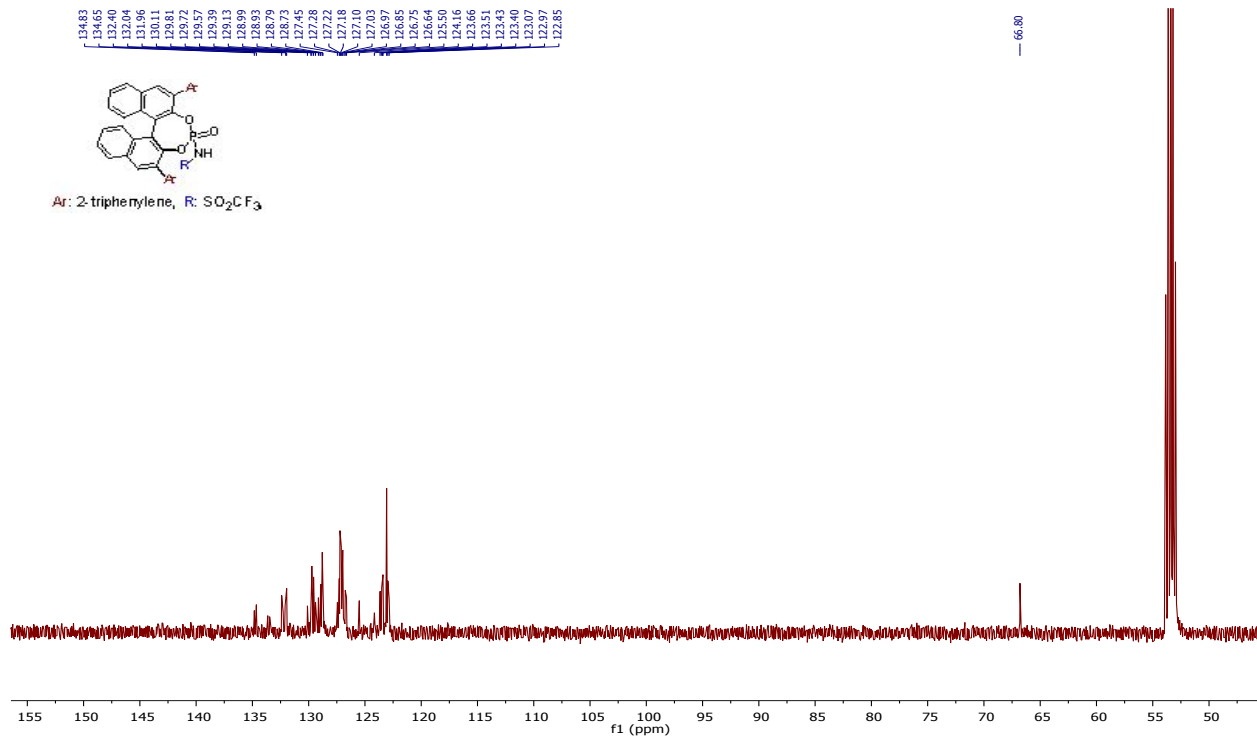

**$^{31}\text{P}$  NMR (203 MHz,  $\text{CD}_2\text{Cl}_2$ ) and  $^{19}\text{F}$  NMR (470 MHz,  $\text{CD}_2\text{Cl}_2$ ) of catalyst **4g****

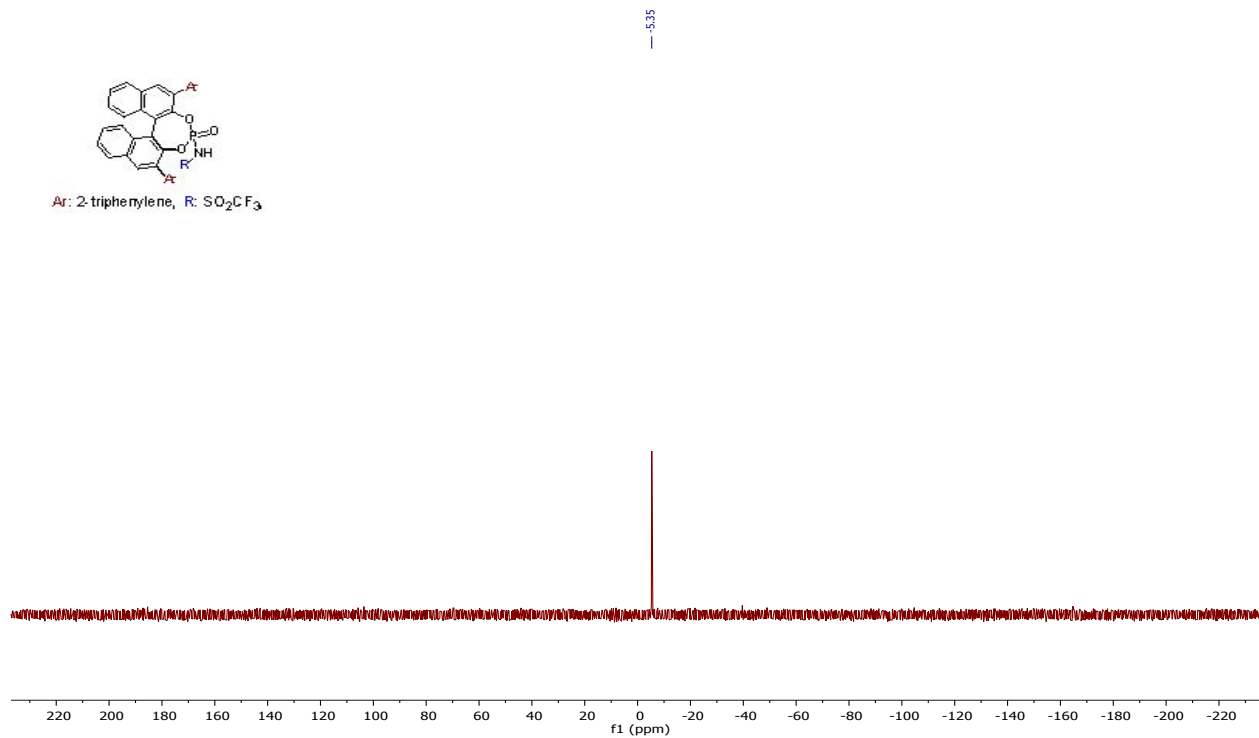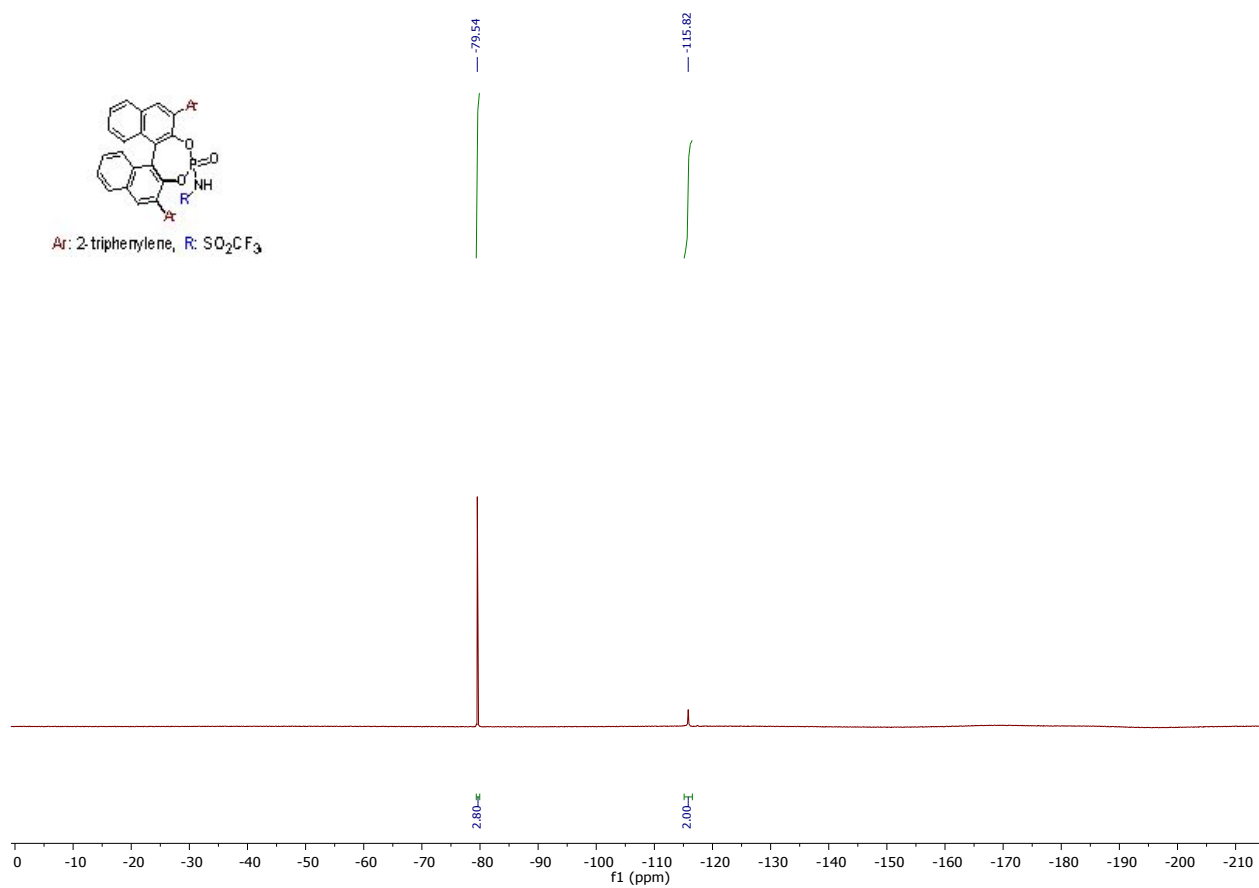

**<sup>1</sup>H NMR (500 MHz, CDCl<sub>3</sub>) and <sup>13</sup>C NMR (125 MHz, CDCl<sub>3</sub>) of 1a**

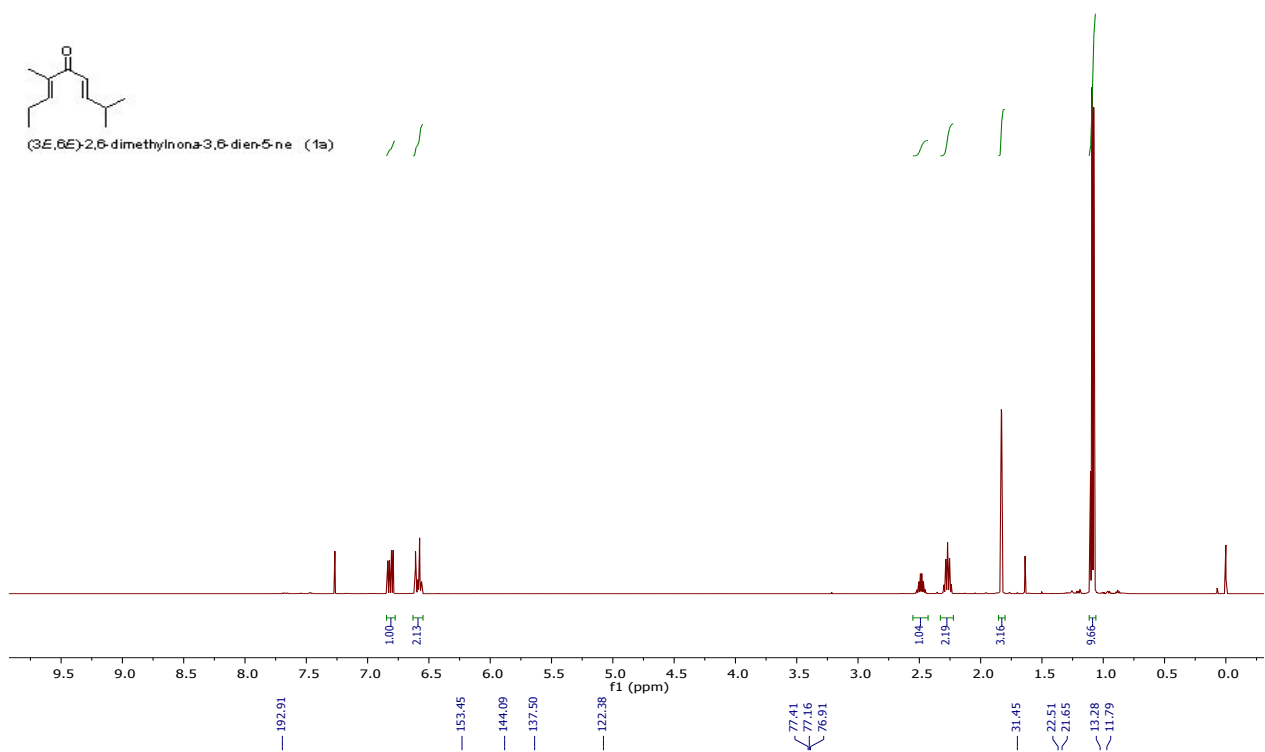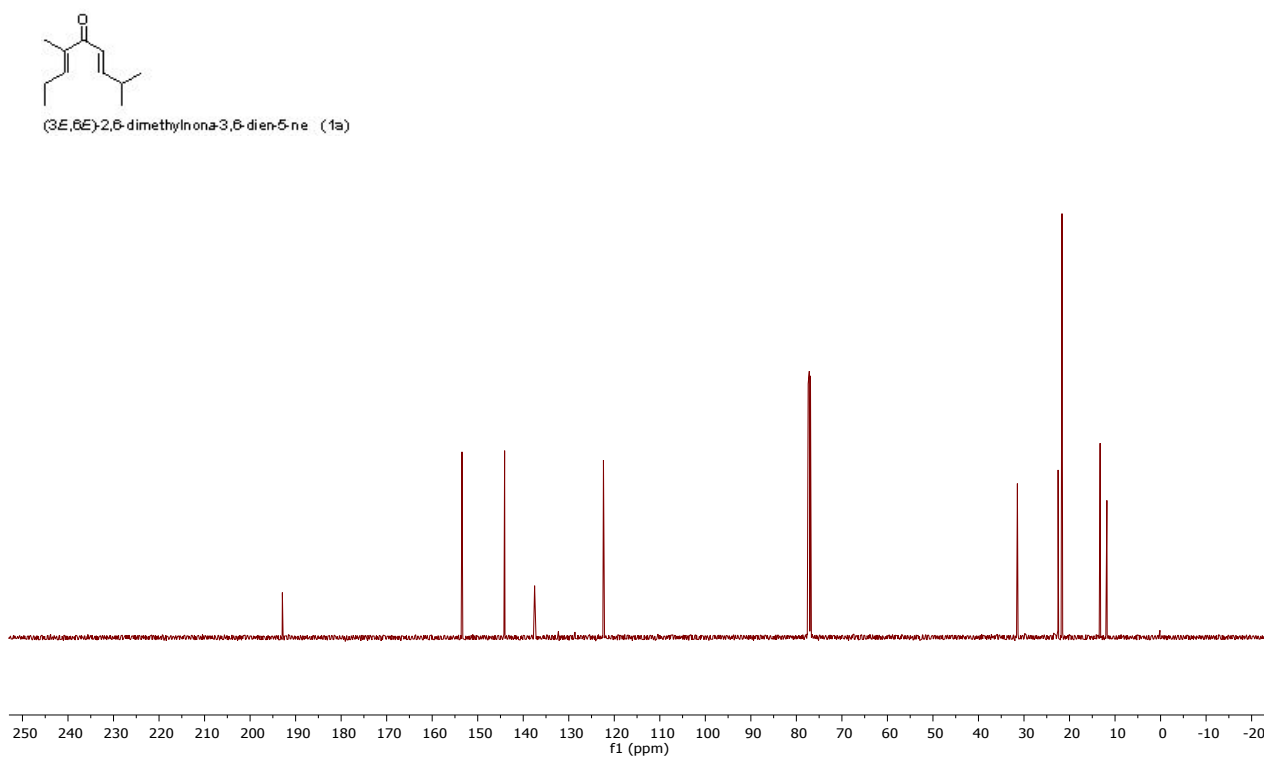

**<sup>1</sup>H NMR (500 MHz, CDCl<sub>3</sub>) and <sup>13</sup>C NMR (125 MHz, CDCl<sub>3</sub>) of **1b****

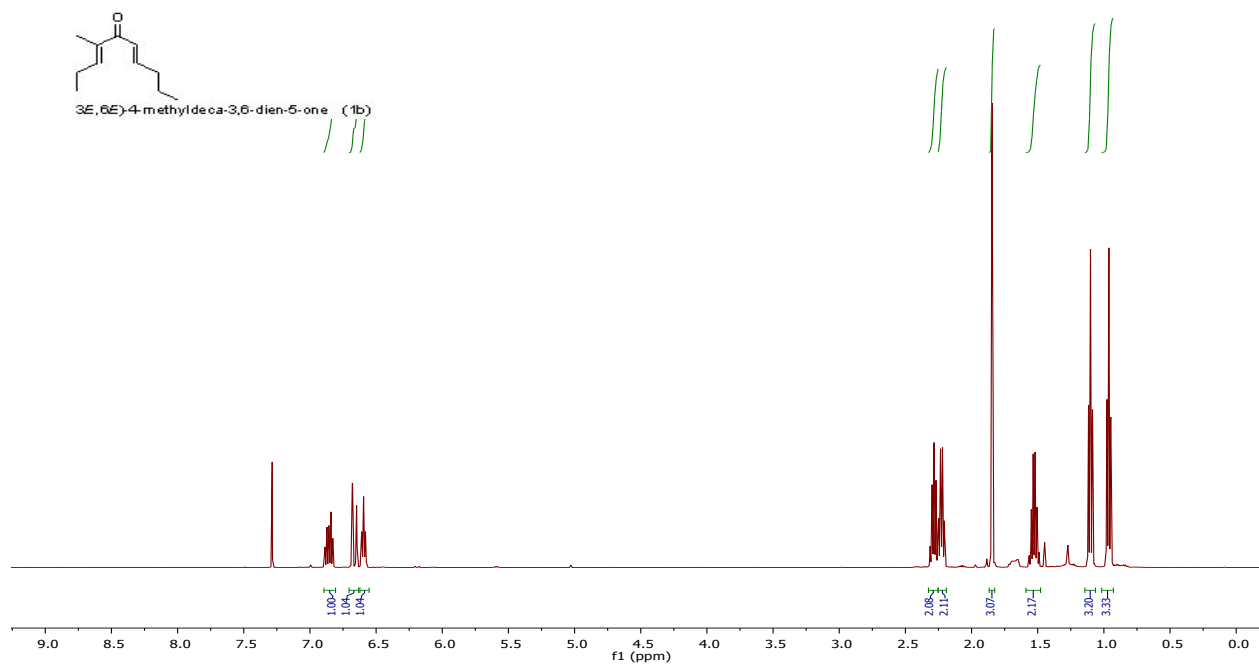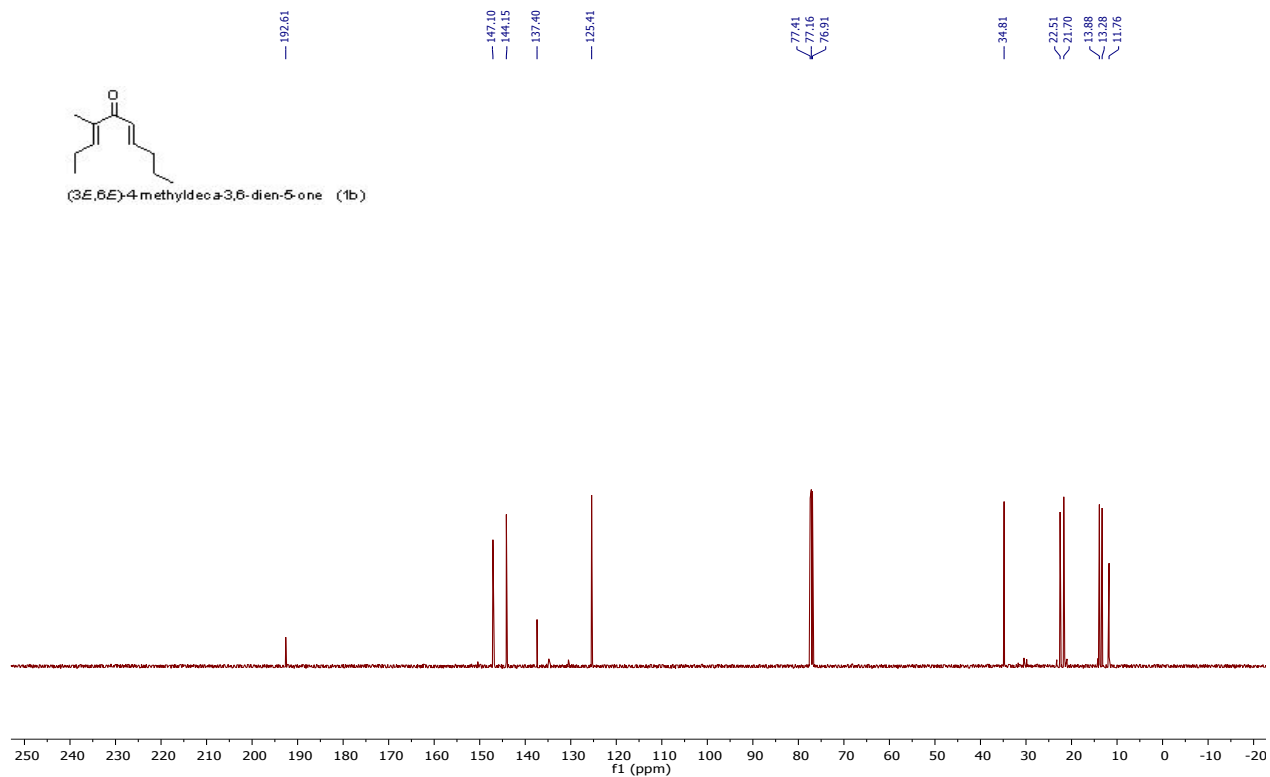

**<sup>1</sup>H NMR (500 MHz, CDCl<sub>3</sub>) and <sup>13</sup>C NMR (125 MHz, CDCl<sub>3</sub>) of 1c**

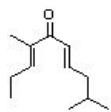

(3*E*,6*E*)-4,9-dimethyldeca-3,6-dien-5-one (1c)

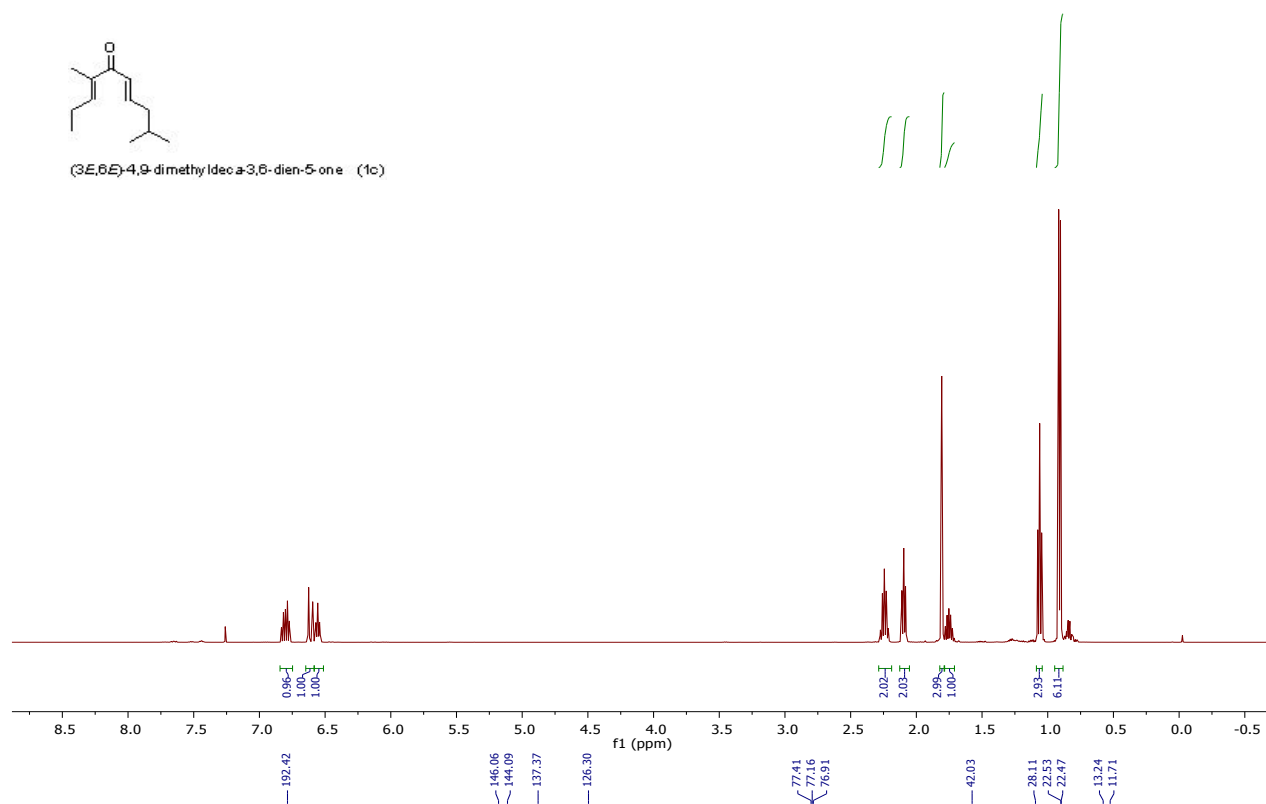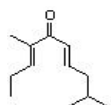

(3*E*,6*E*)-4,9-dimethyldeca-3,6-dien-5-one (1c)

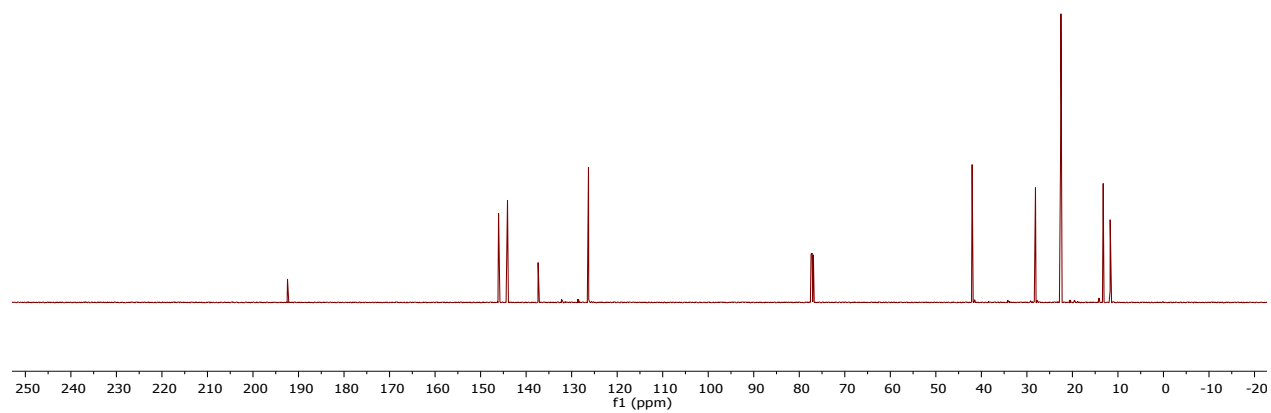

**<sup>1</sup>H NMR (500 MHz, CDCl<sub>3</sub>) and <sup>13</sup>C NMR (125 MHz, CDCl<sub>3</sub>) of **1d****

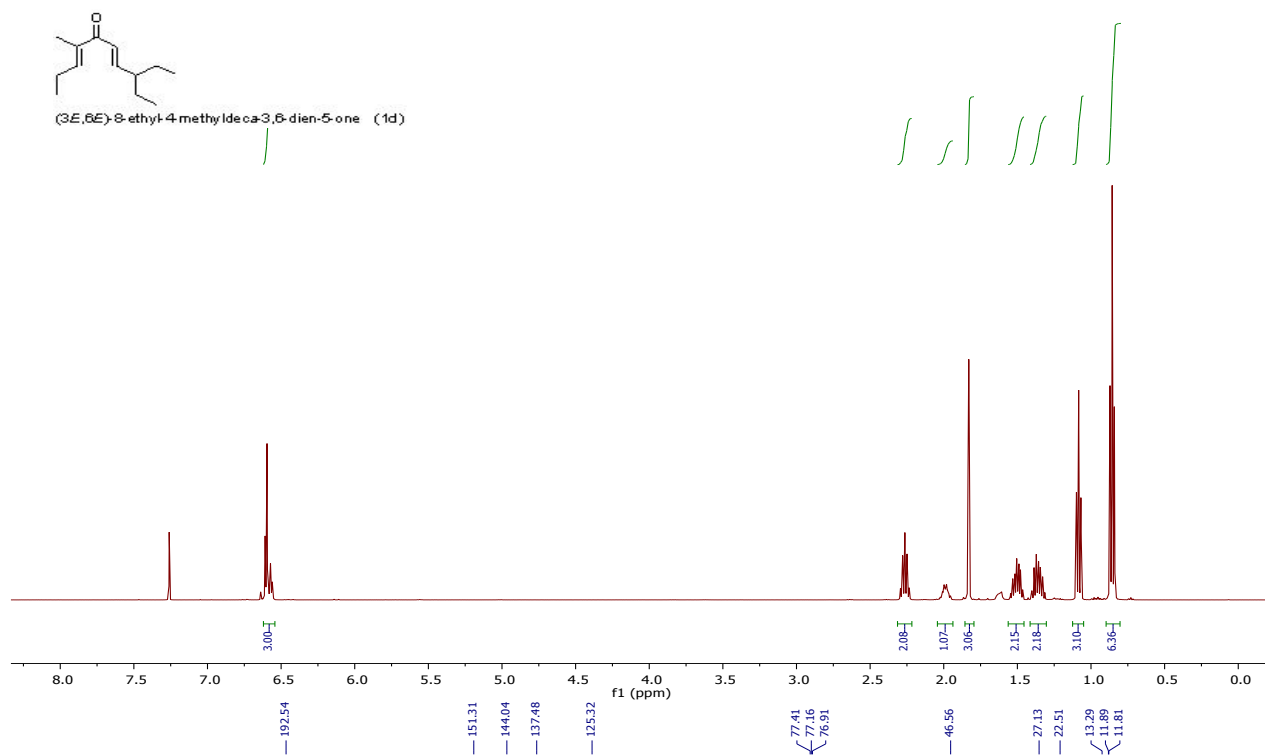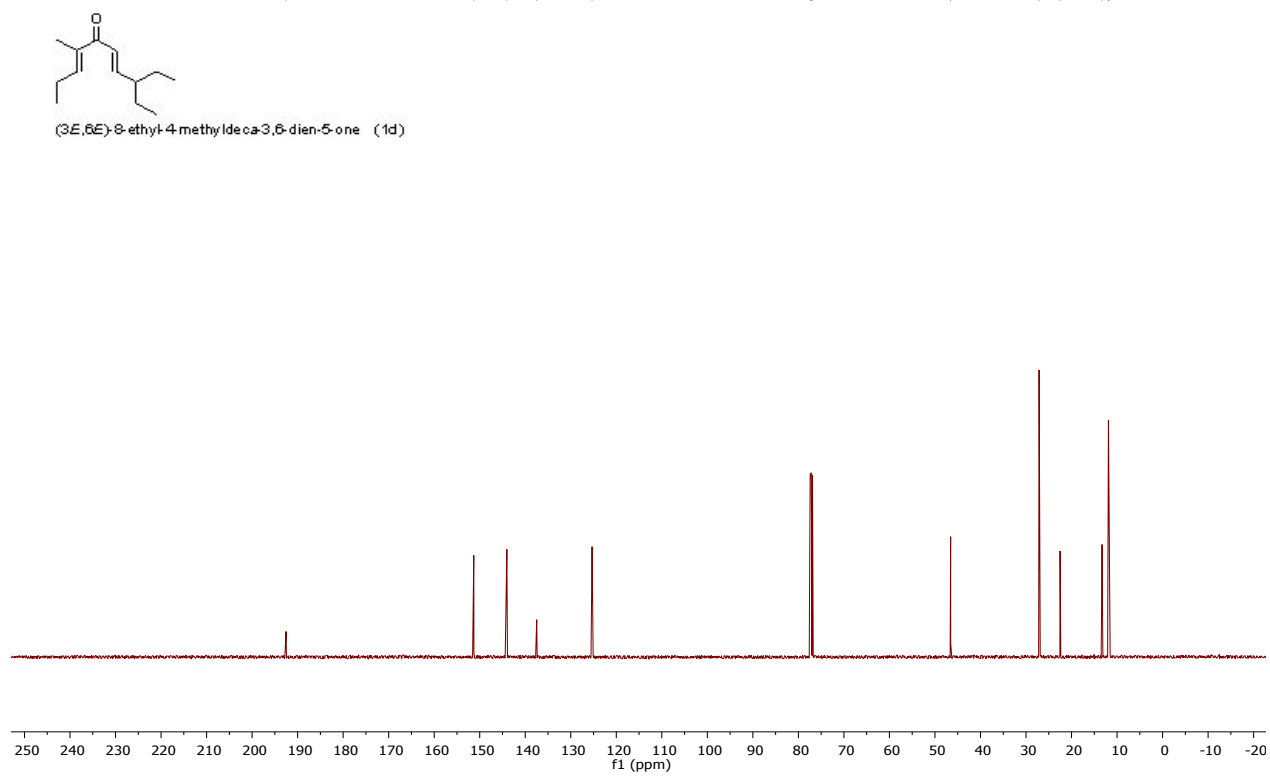



**<sup>1</sup>H NMR (500 MHz, CDCl<sub>3</sub>) and <sup>13</sup>C NMR (125 MHz, CDCl<sub>3</sub>) of 1e**

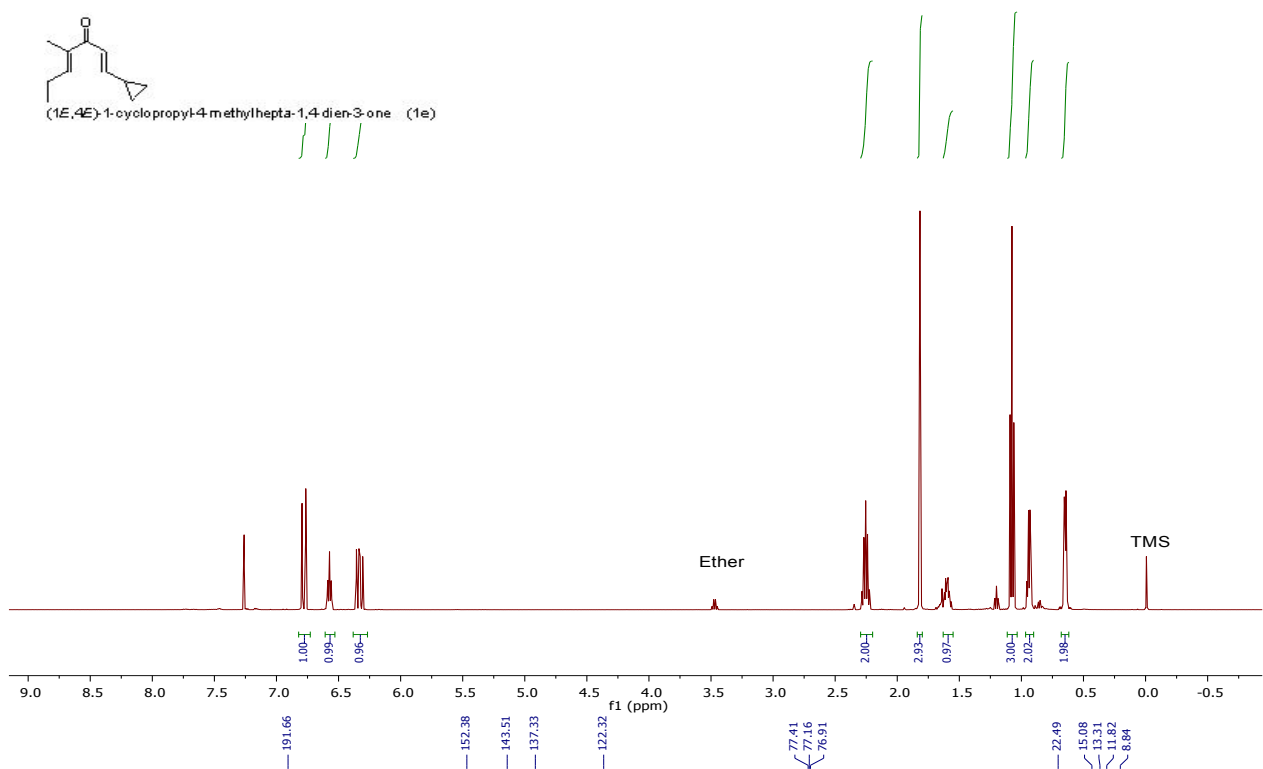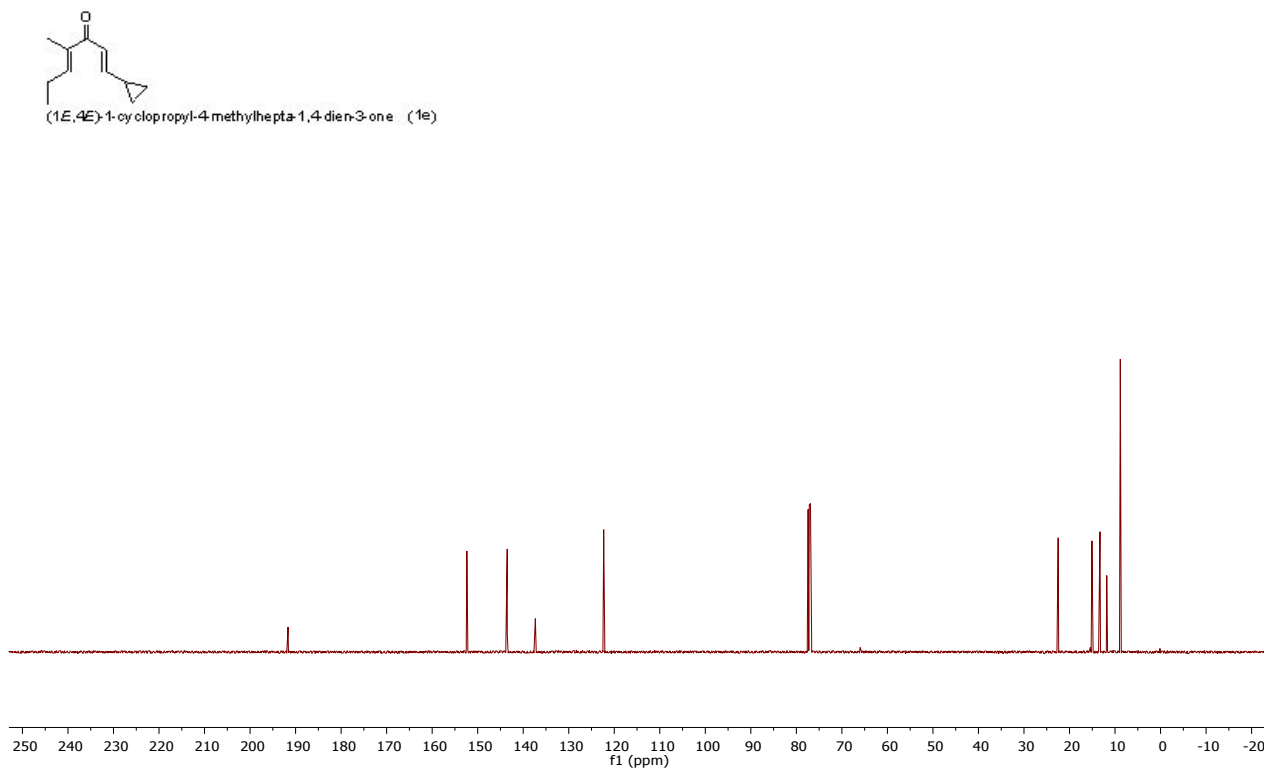

**<sup>1</sup>H NMR (500 MHz, CDCl<sub>3</sub>) and <sup>13</sup>C NMR (125 MHz, CDCl<sub>3</sub>) of **1f****

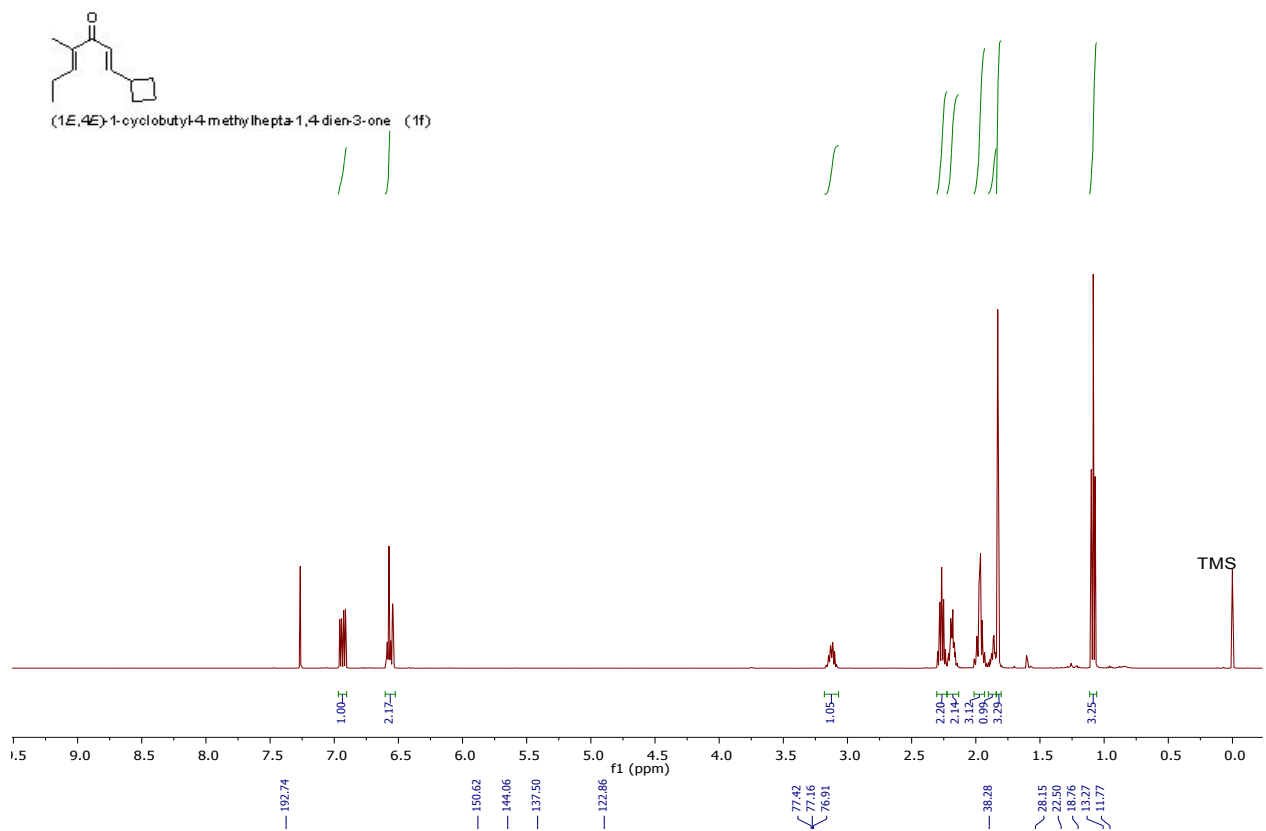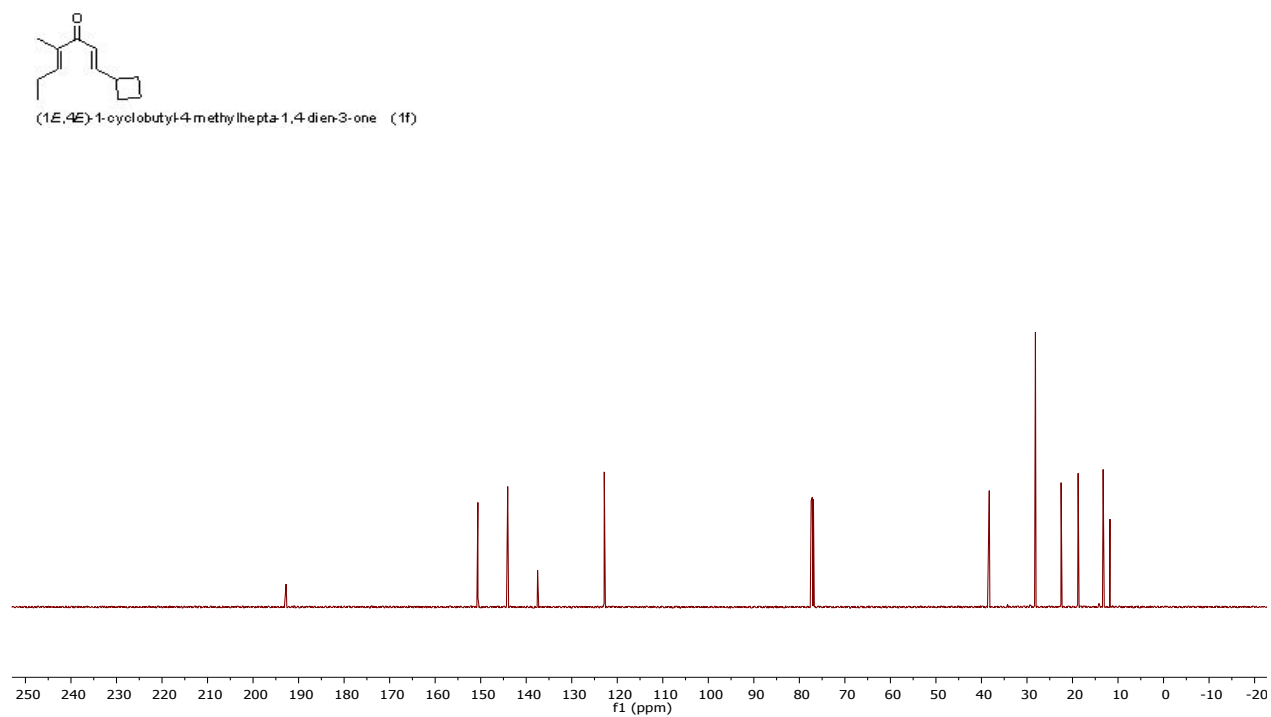

**<sup>1</sup>H NMR (500 MHz, CDCl<sub>3</sub>) and <sup>13</sup>C NMR (125 MHz, CDCl<sub>3</sub>) of **1g****

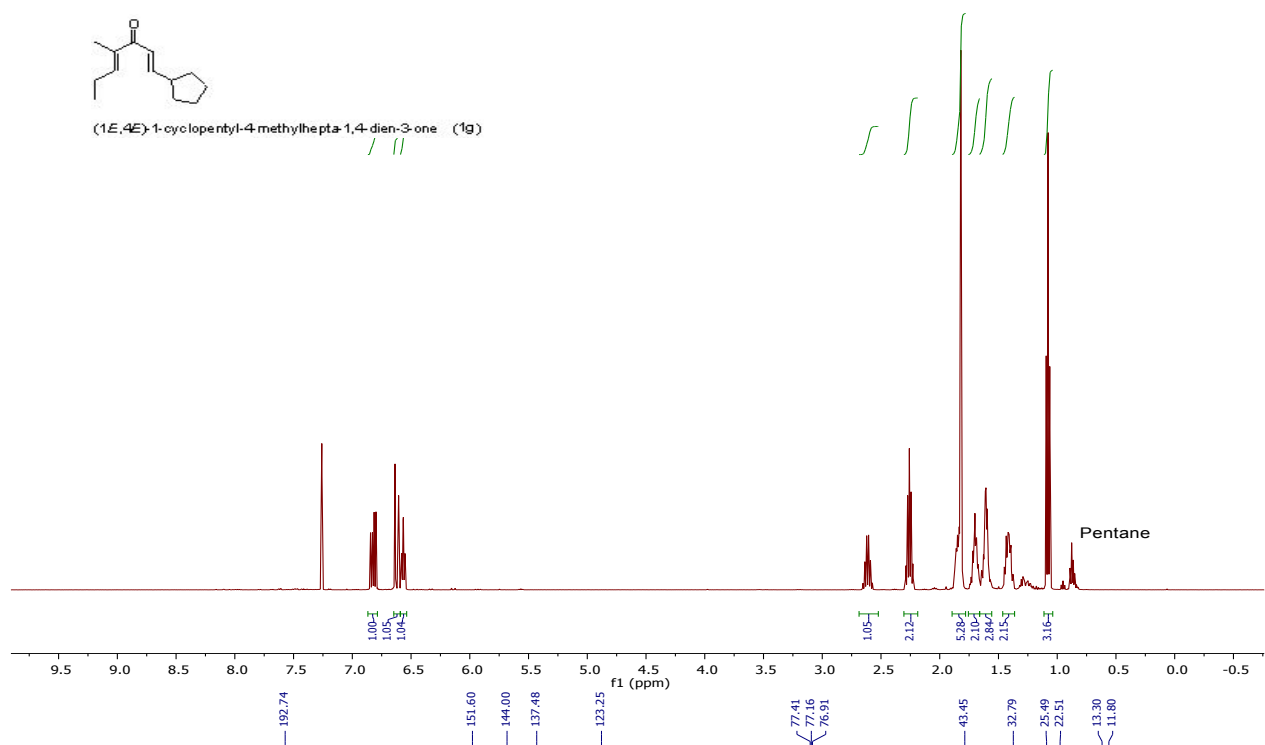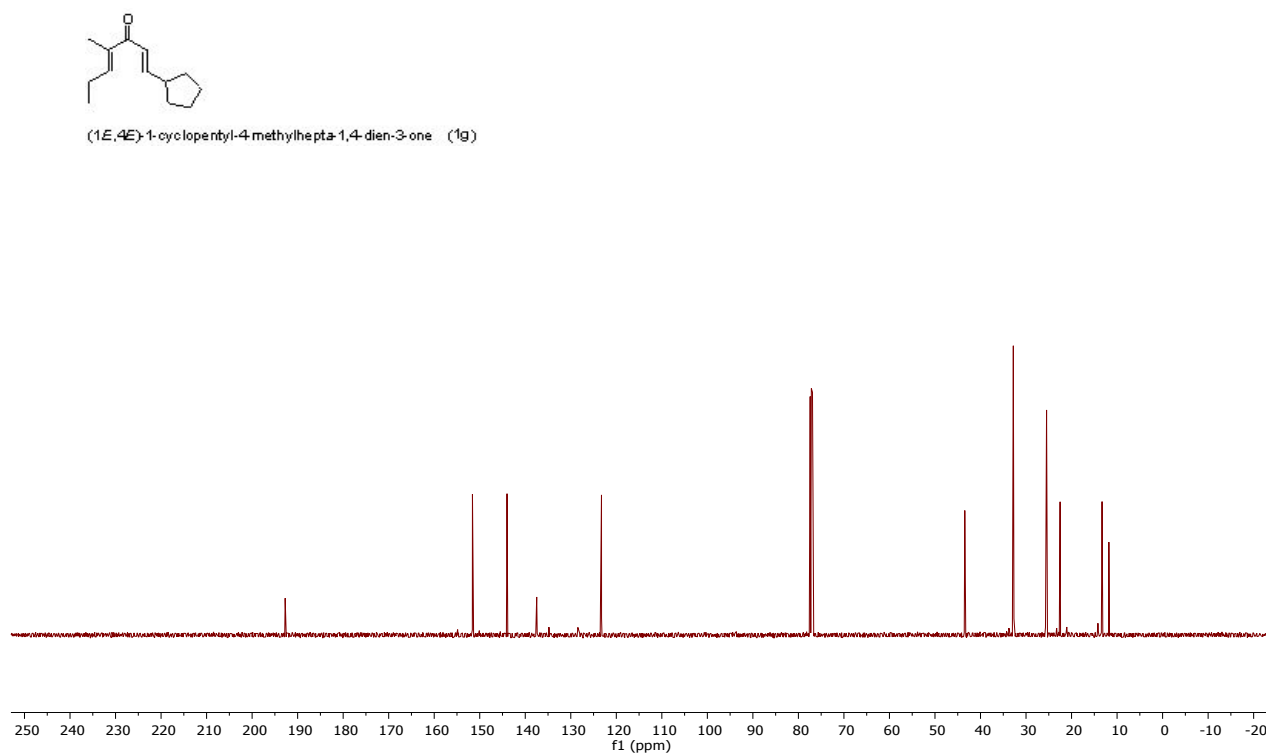

**<sup>1</sup>H NMR (500 MHz, CDCl<sub>3</sub>) and <sup>13</sup>C NMR (125 MHz, CDCl<sub>3</sub>) of **1h****

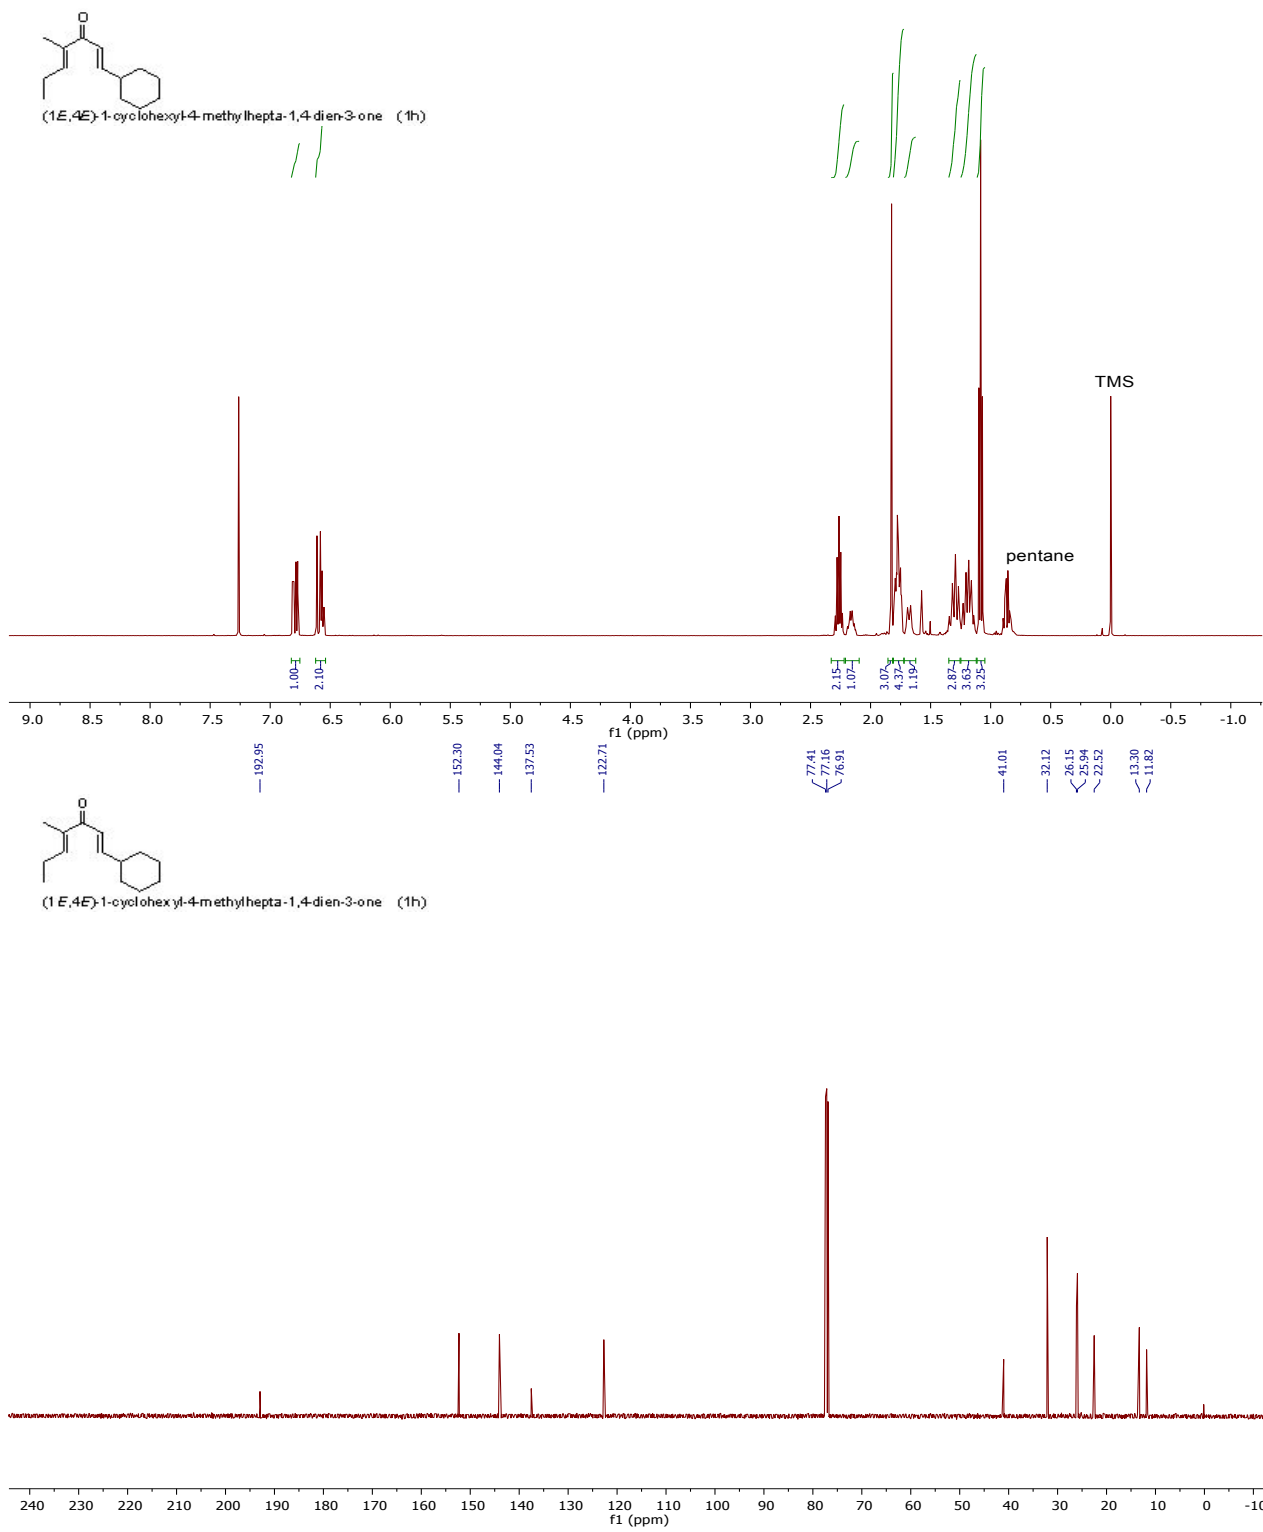

**<sup>1</sup>H NMR (500 MHz, CDCl<sub>3</sub>) and <sup>13</sup>C NMR (125 MHz, CDCl<sub>3</sub>) of **1i****

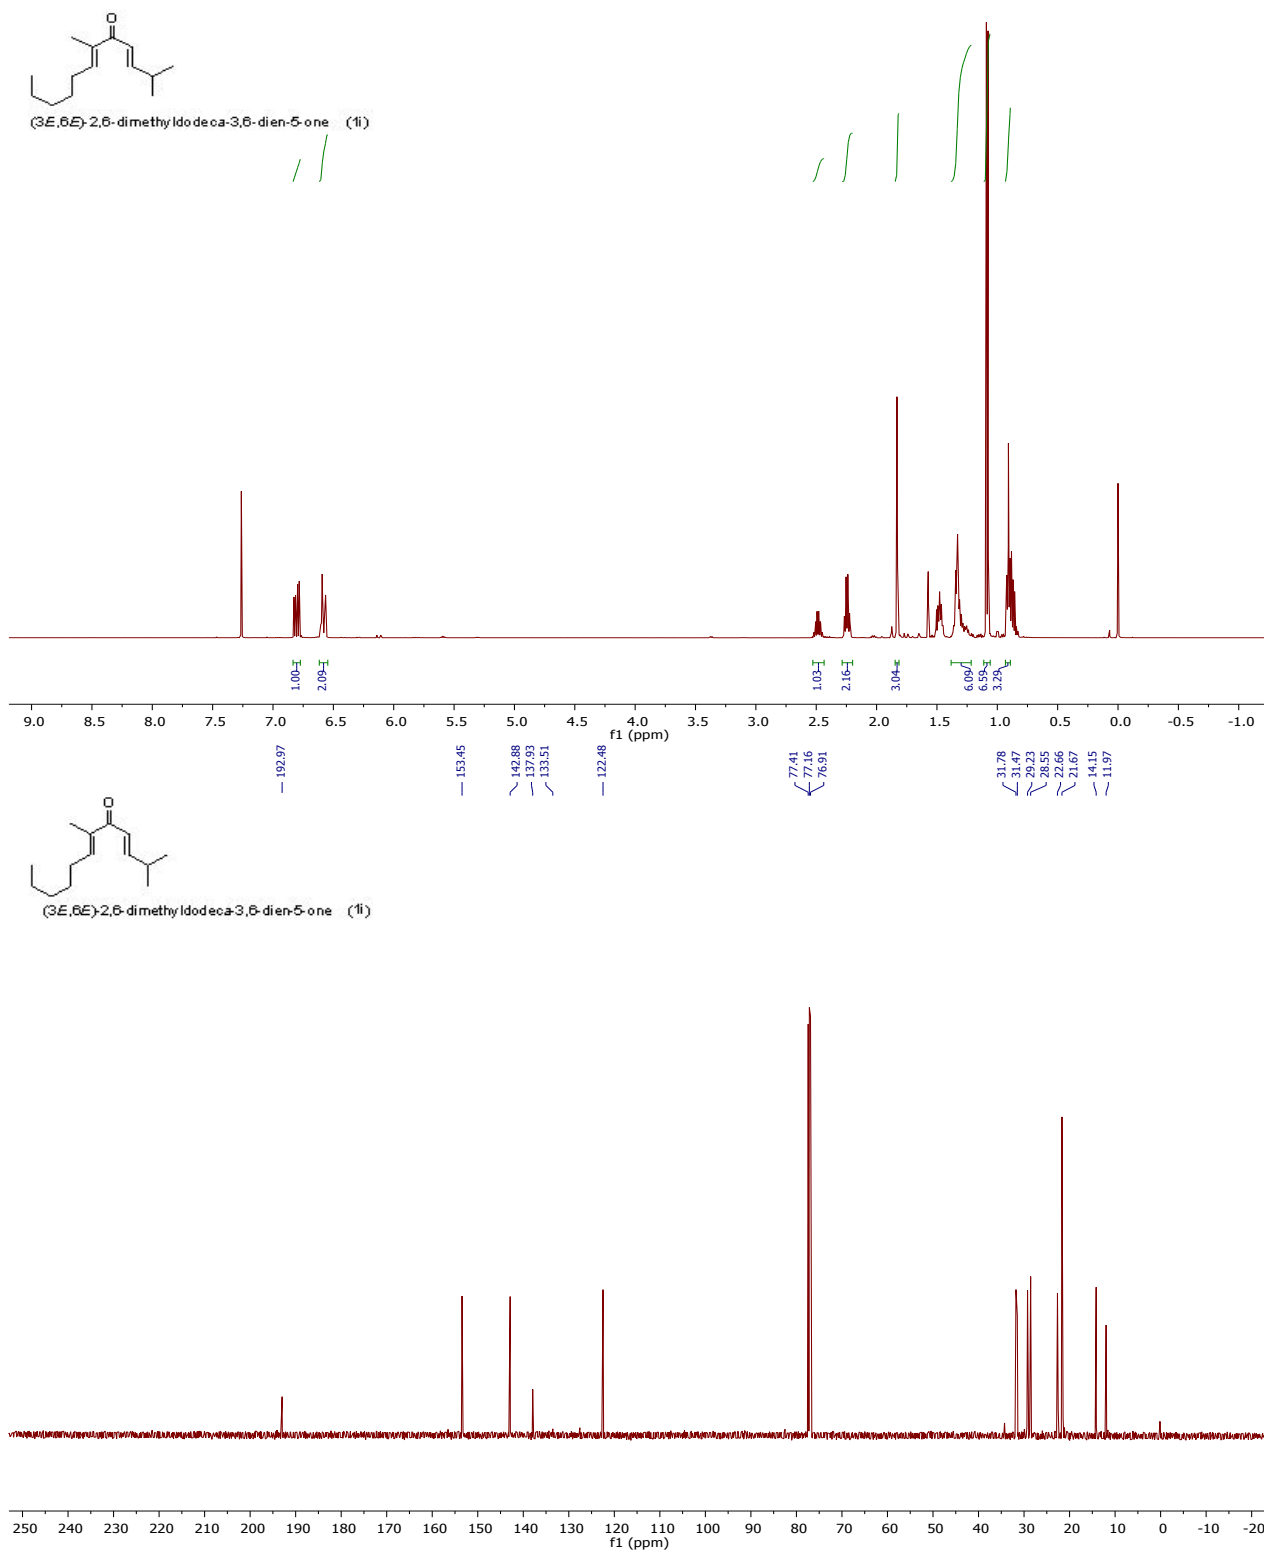

**<sup>1</sup>H NMR (500 MHz, CDCl<sub>3</sub>) and <sup>13</sup>C NMR (125 MHz, CDCl<sub>3</sub>) of **1j****

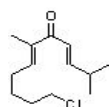

(3*E*,6*E*)-11-chloro-2,6-dimethylundeca-3,6-dien-5-one (1j)

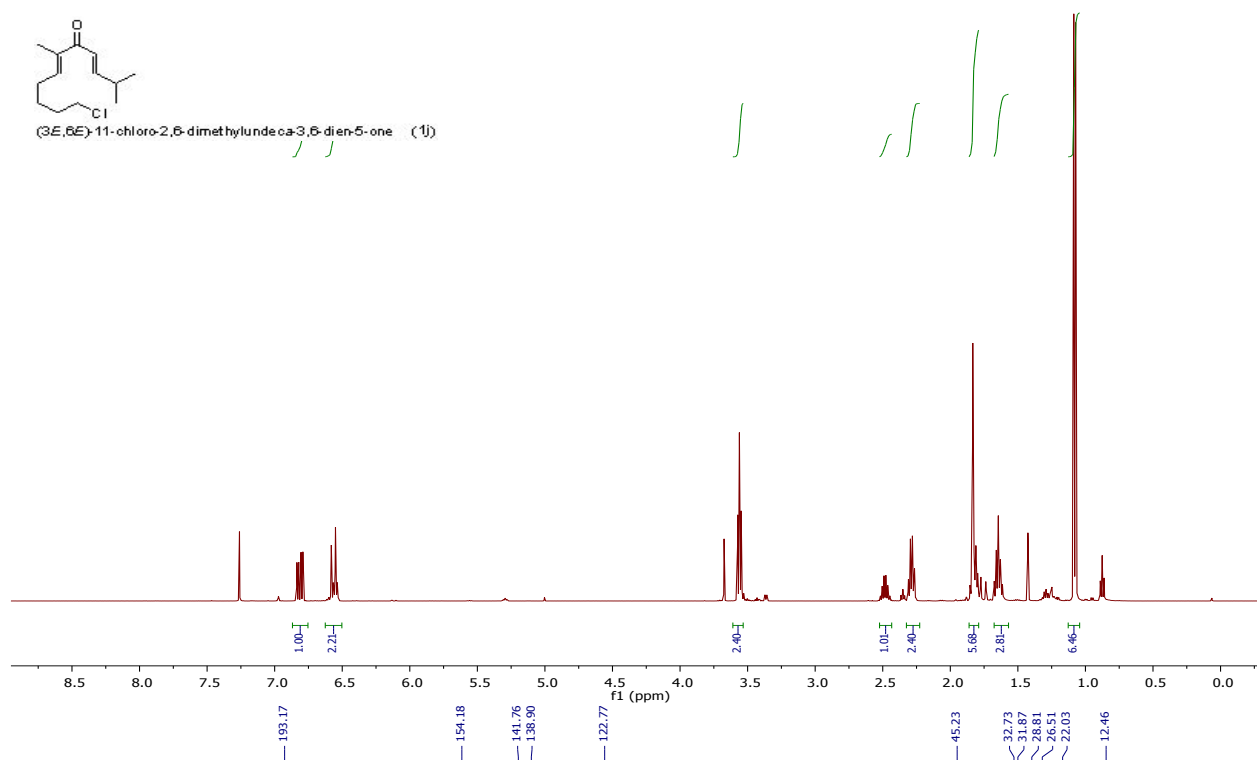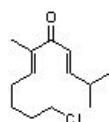

(3*E*,6*E*)-11-chloro-2,6-dimethylundeca-3,6-dien-5-one (1j)

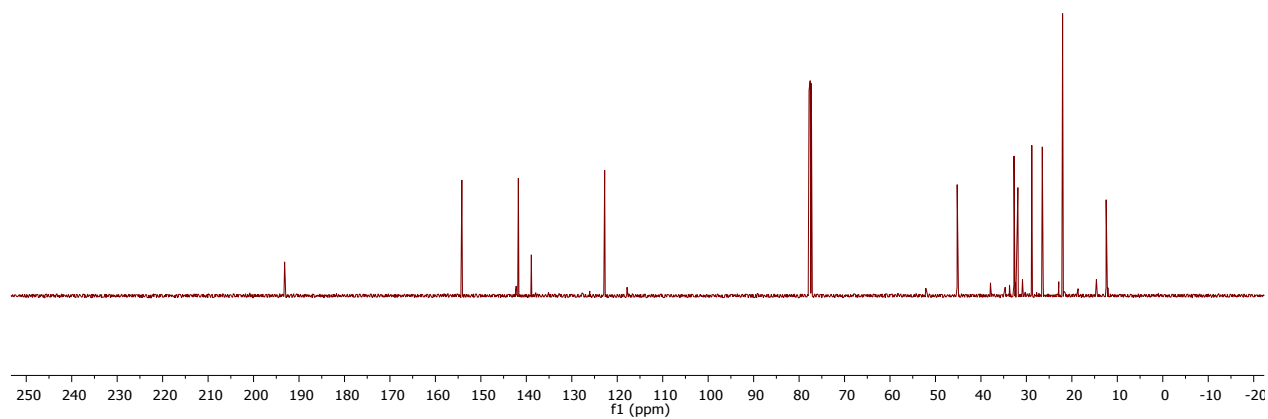

**<sup>1</sup>H NMR (500 MHz, CDCl<sub>3</sub>) and <sup>13</sup>C NMR (125 MHz, CDCl<sub>3</sub>) of **1k****

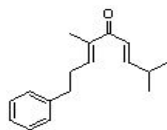

(3E,6E)-4,8-dimethyl-1-phenylnona-3,6-dien-5-one (1k)

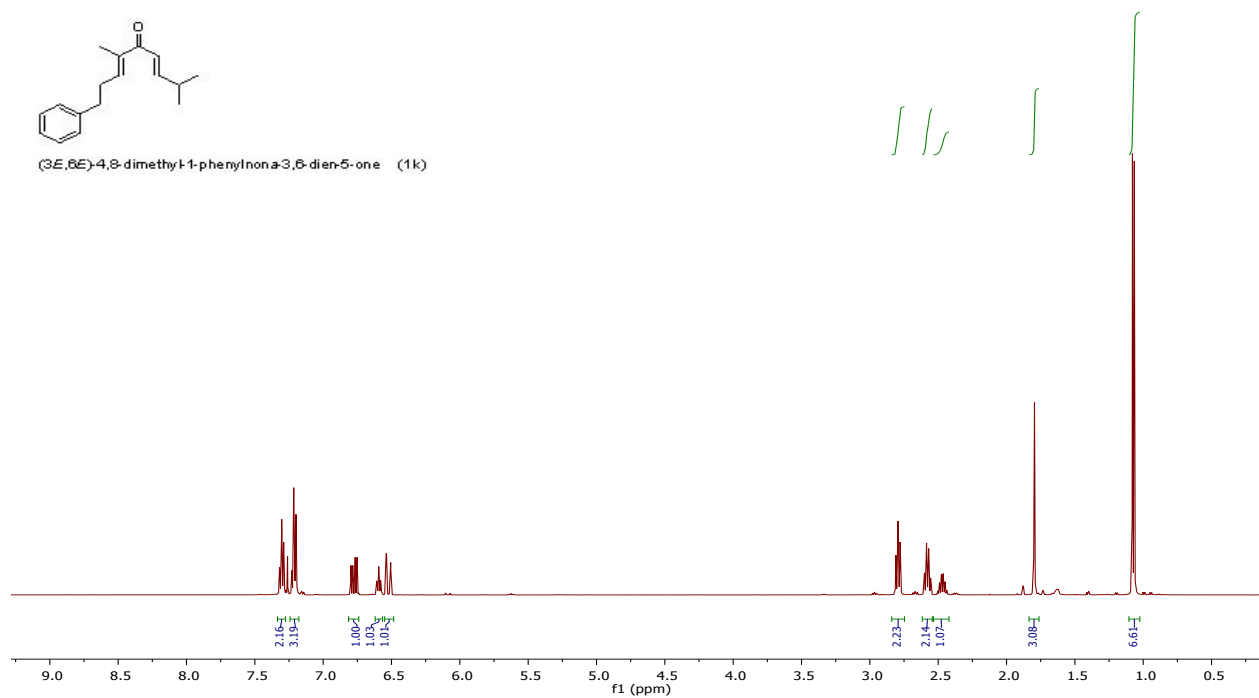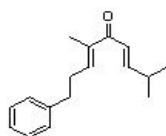

(3E,6E)-4,8-dimethyl-1-phenylnona-3,6-dien-5-one (1k)

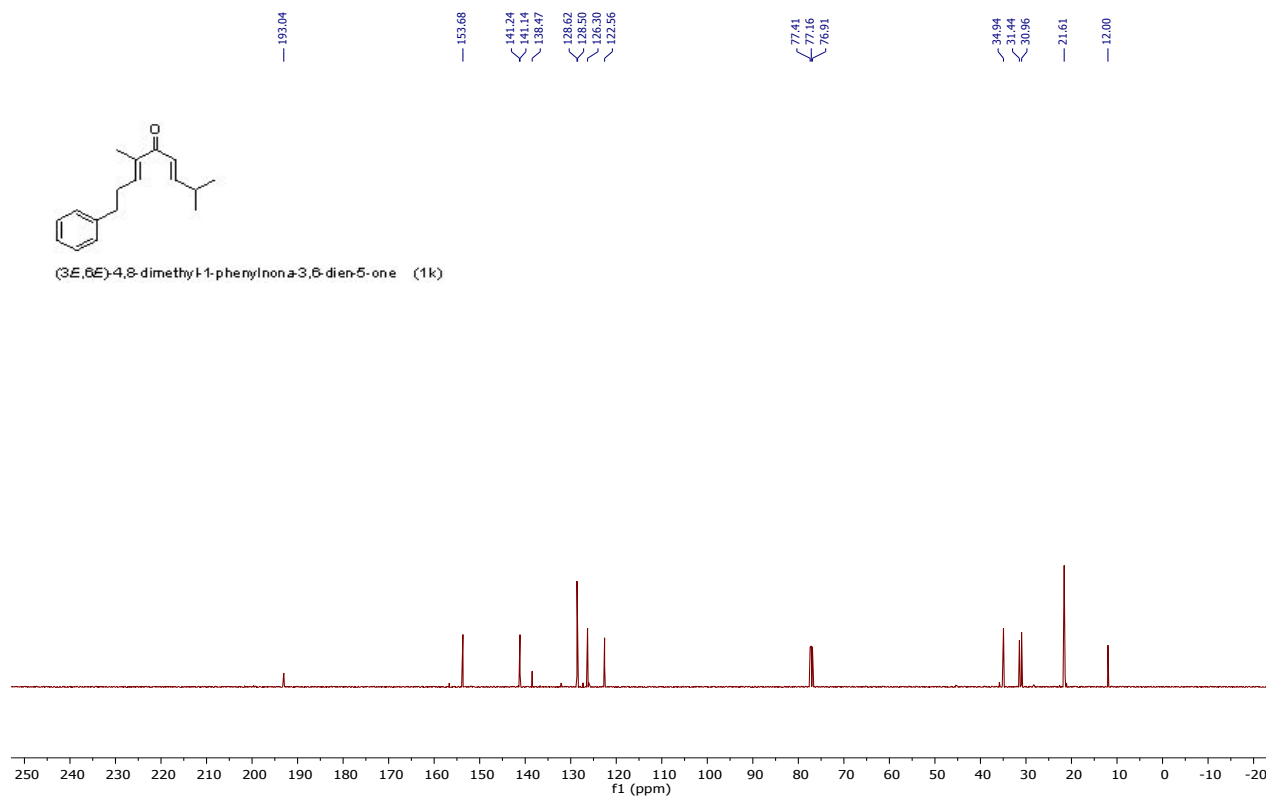

**<sup>1</sup>H NMR (500 MHz, CDCl<sub>3</sub>) and <sup>13</sup>C NMR (125 MHz, CDCl<sub>3</sub>) of **11****

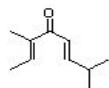

(2*E*,5*E*)-3,7-dimethylocta-2,5-dien-4-one (**11**)

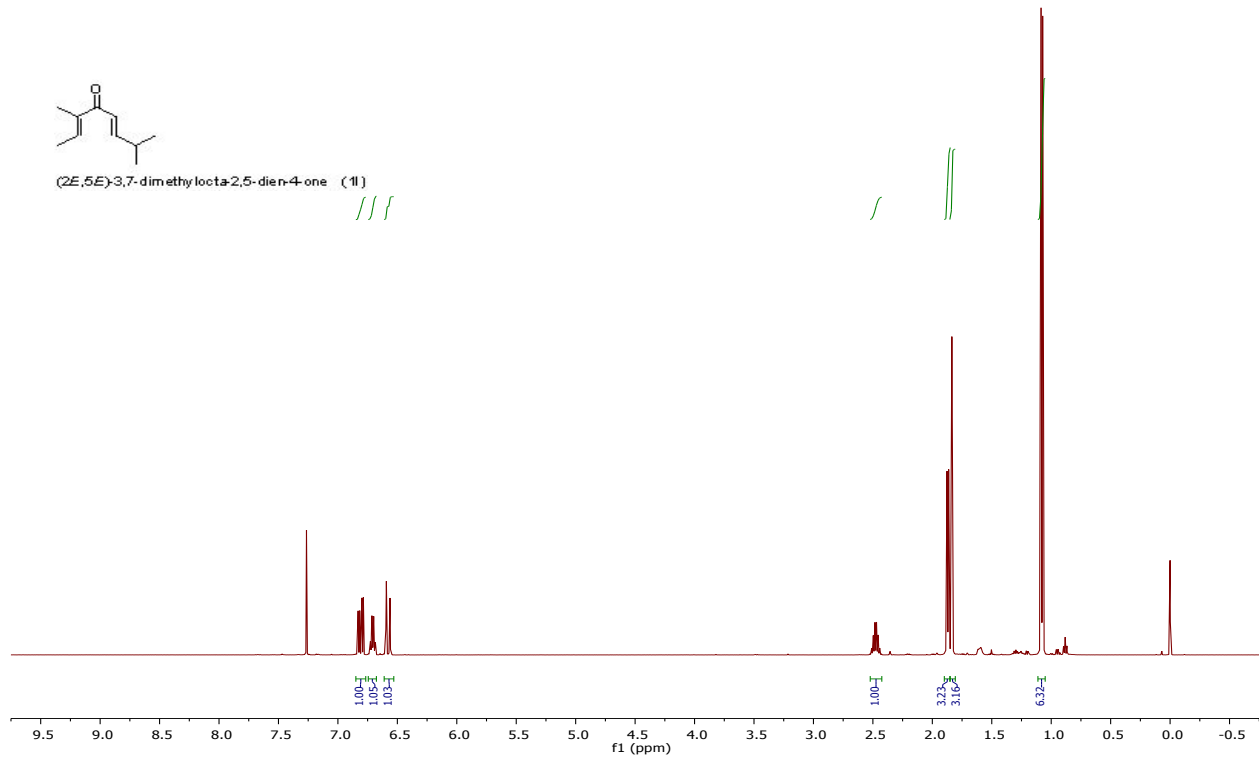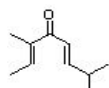

(2*E*,5*E*)-3,7-dimethylocta-2,5-dien-4-one (**11**)

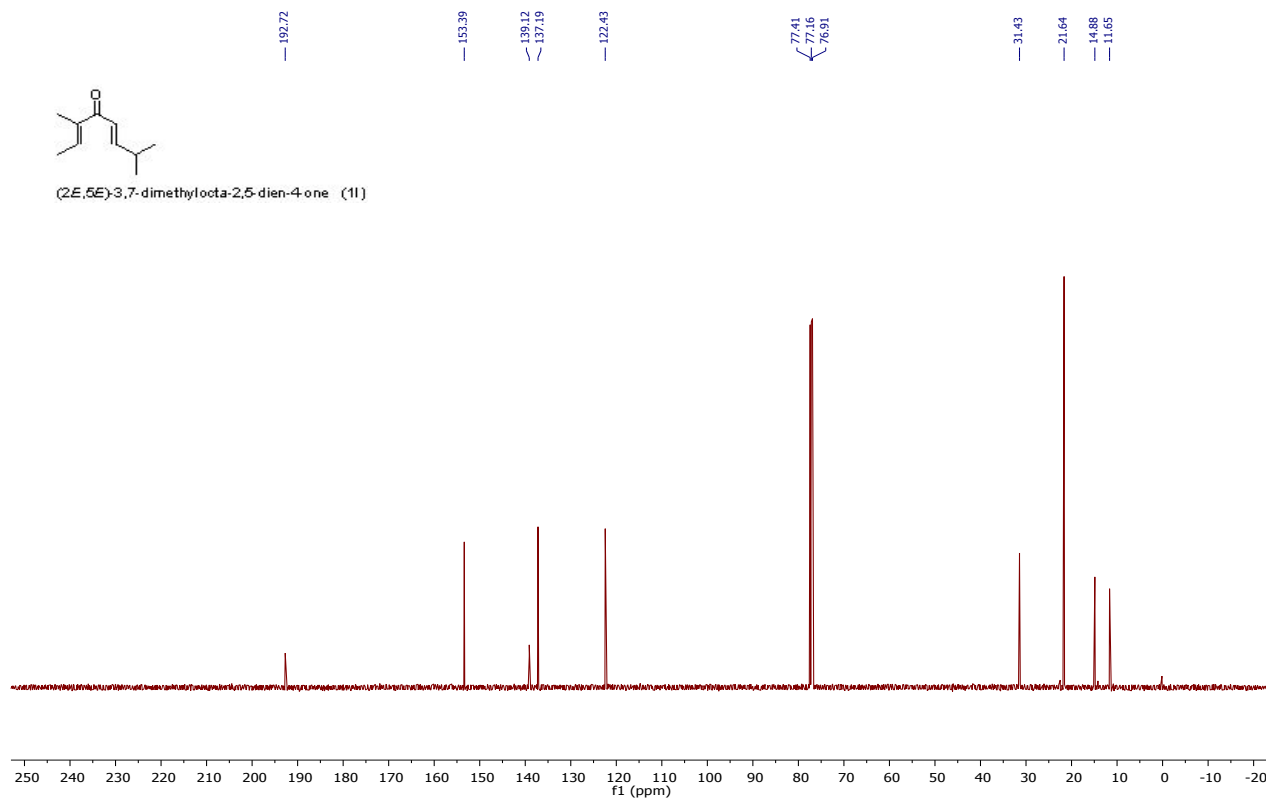



**<sup>1</sup>H NMR (500 MHz, CDCl<sub>3</sub>) and <sup>13</sup>C NMR (125 MHz, CDCl<sub>3</sub>) of 1m**

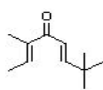

(2E,5E)-3,7,7-trimethylocta-2,5-dien-4-one (1m)

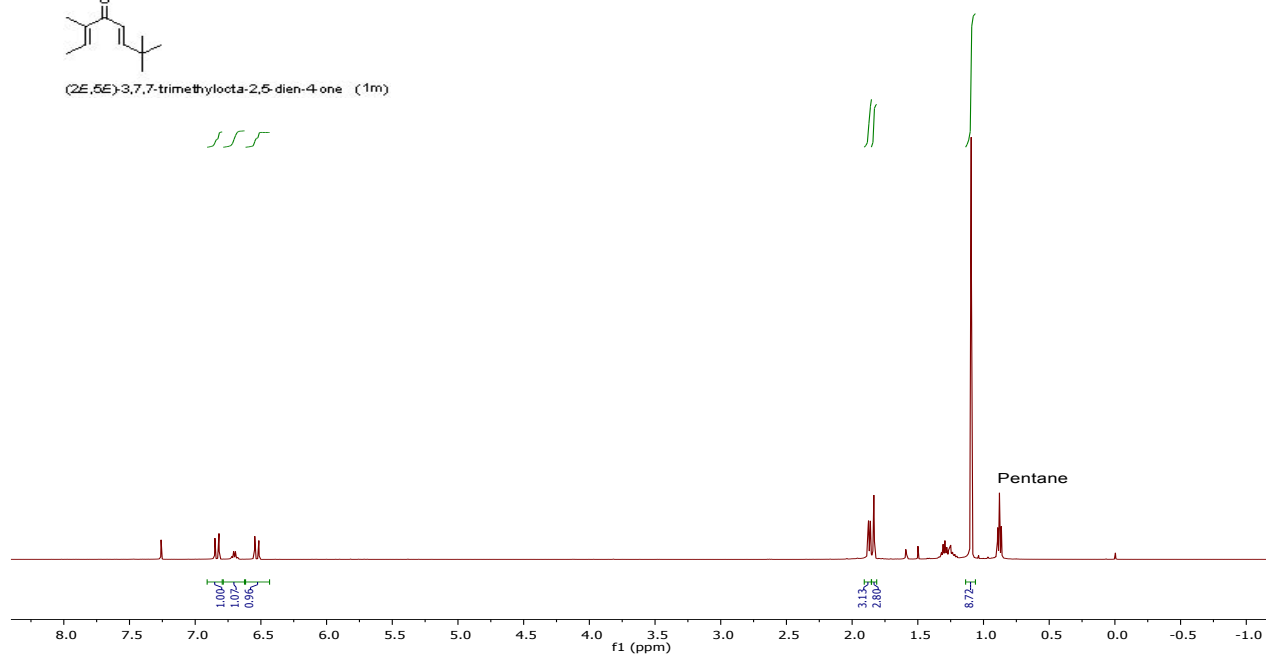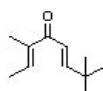

(2E,5E)-3,7,7-trimethylocta-2,5-dien-4-one (1m)

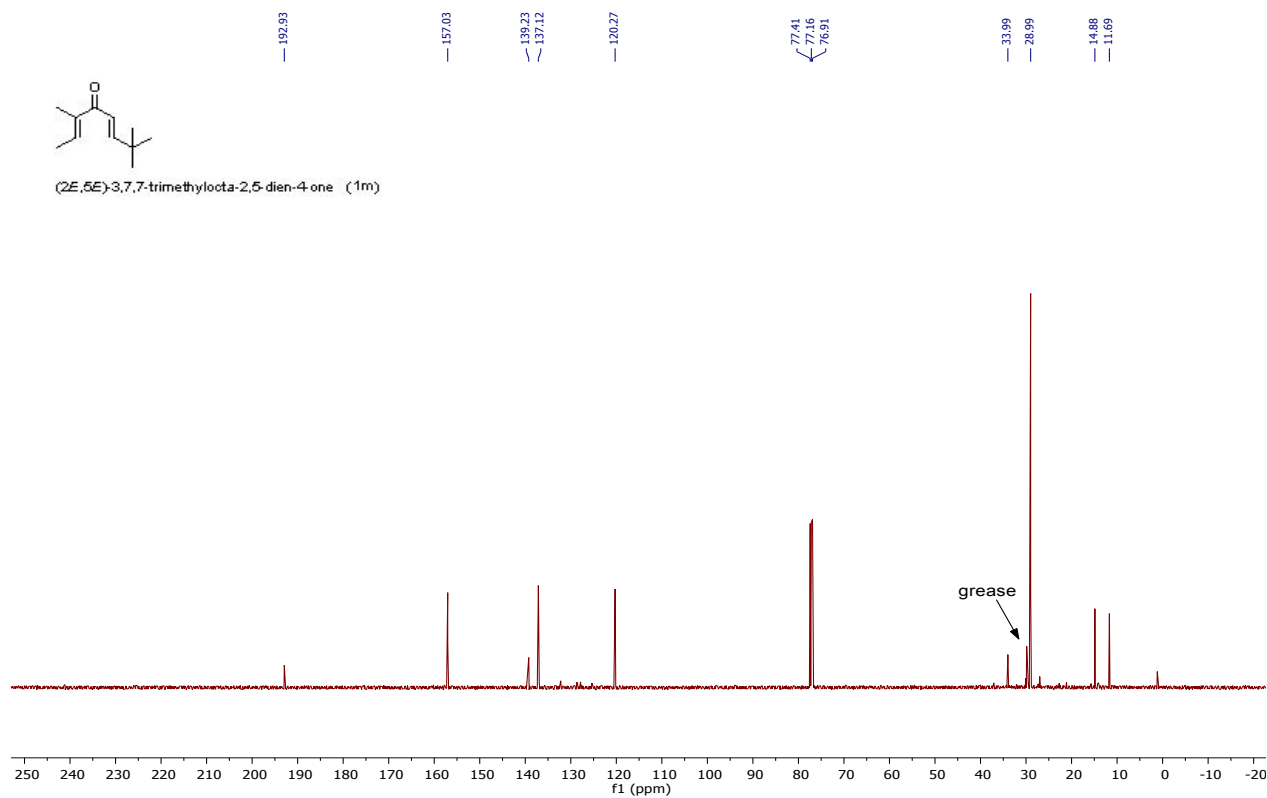

**<sup>1</sup>H NMR (500 MHz, CDCl<sub>3</sub>) and <sup>13</sup>C NMR (125 MHz, CDCl<sub>3</sub>) of **1n****

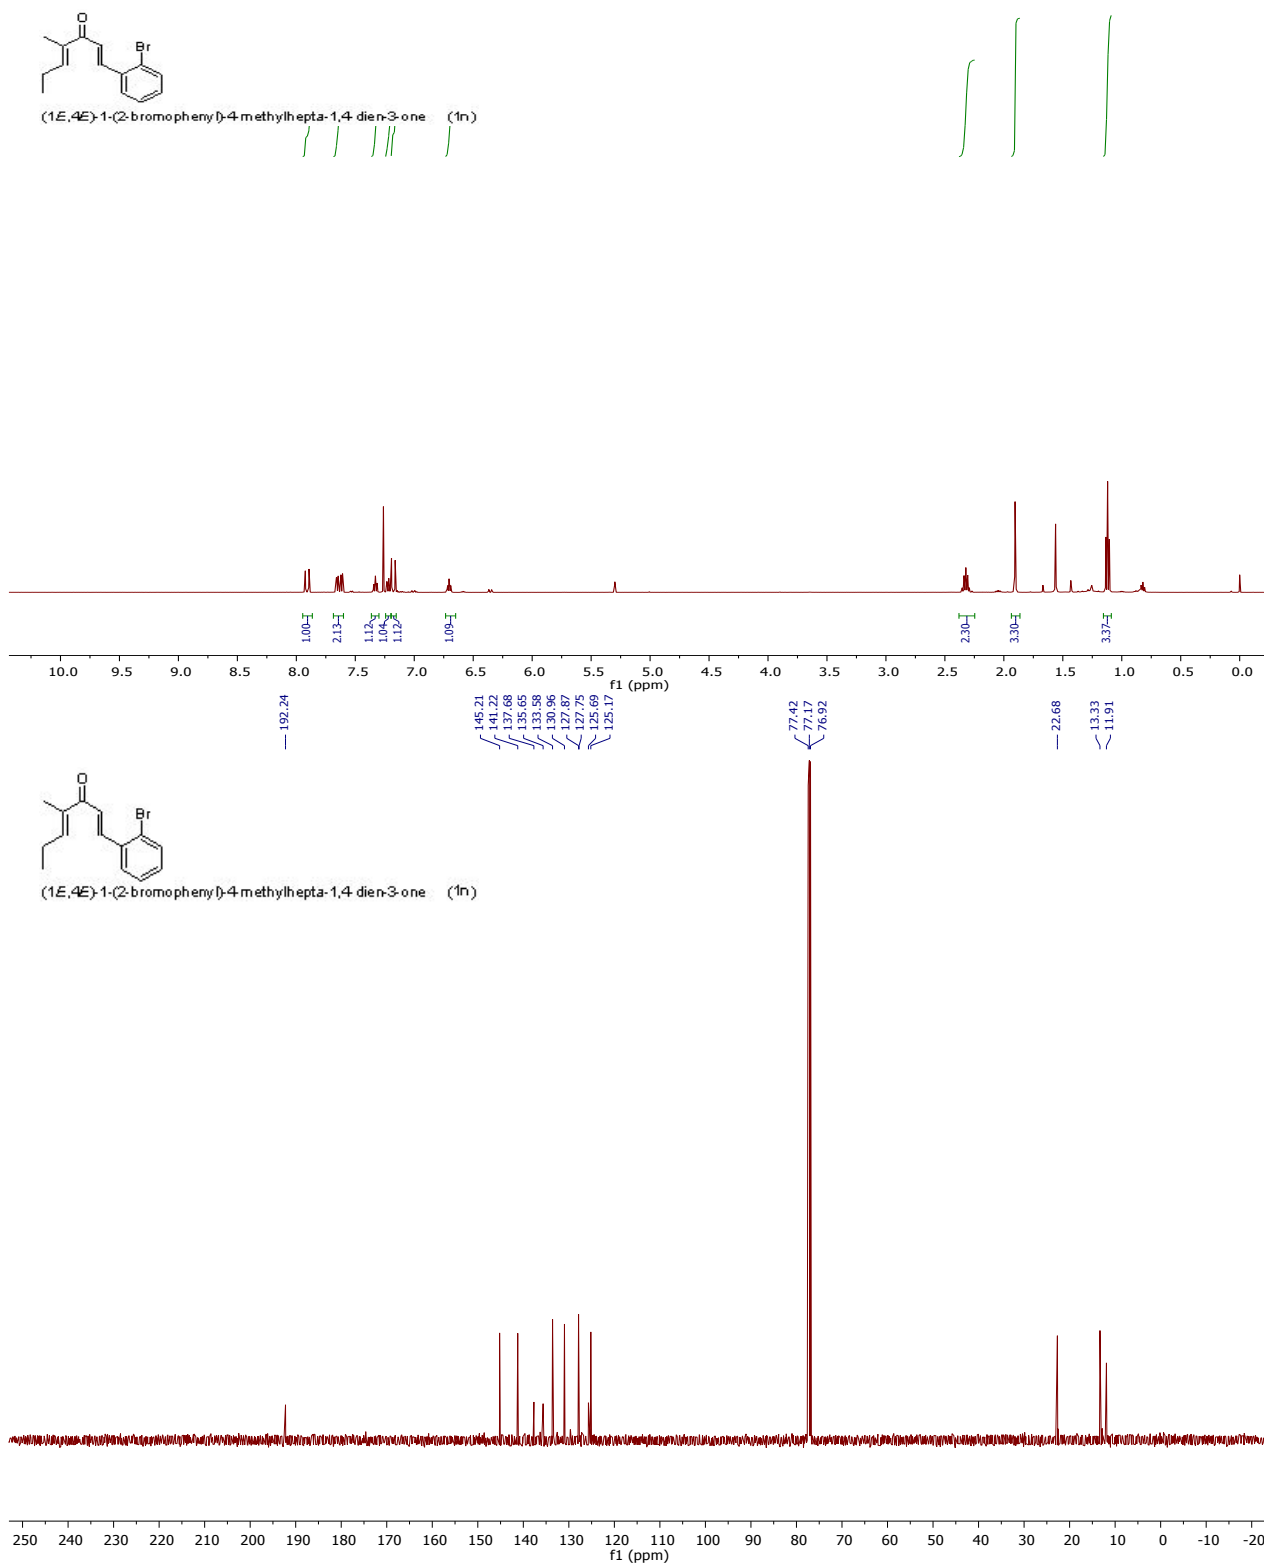

**$^1\text{H}$  NMR (500 MHz,  $\text{CDCl}_3$ ) and  $^{13}\text{C}$  NMR (125 MHz,  $\text{CDCl}_3$ ) of **2a****

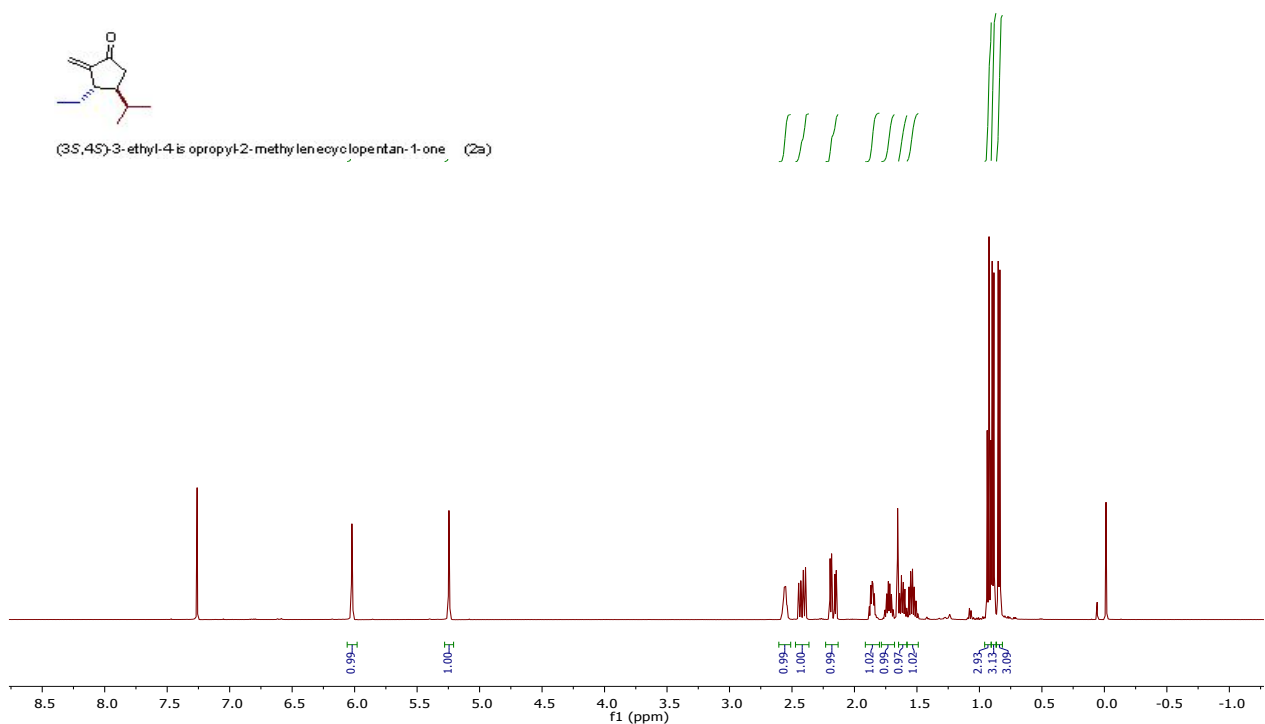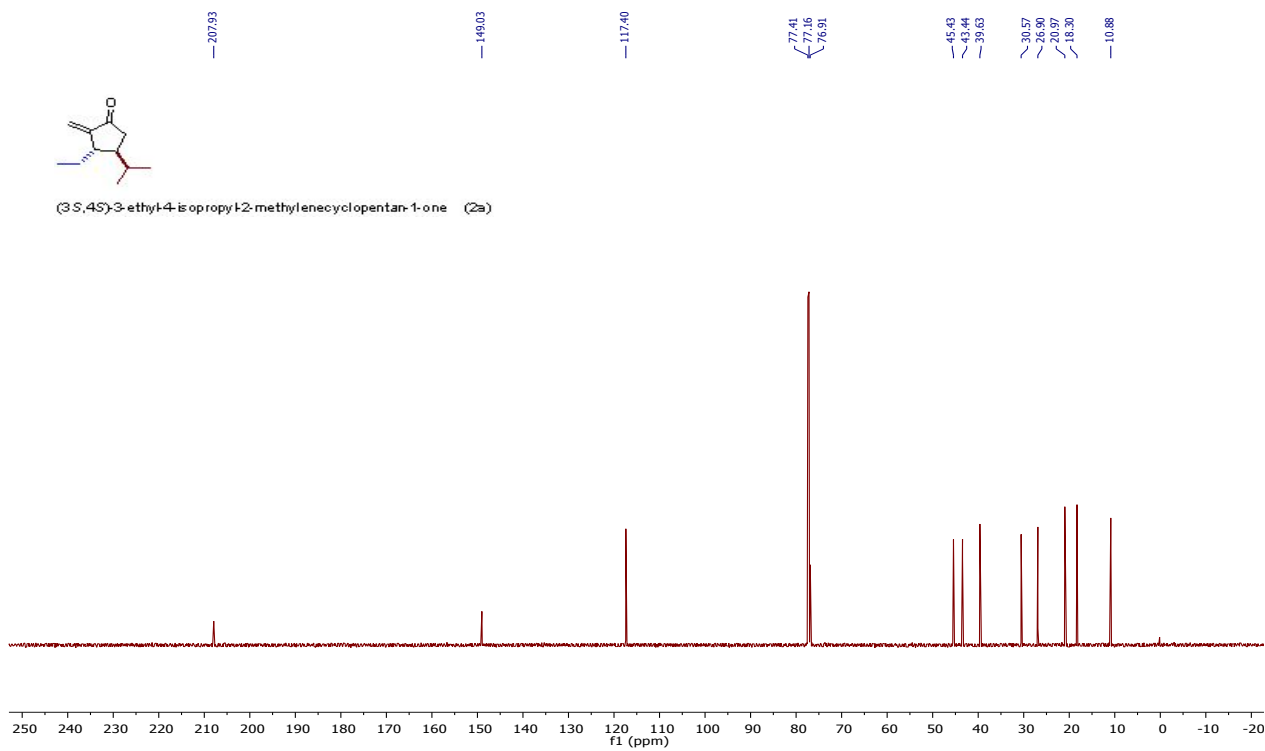

**<sup>1</sup>H NMR (500 MHz, CDCl<sub>3</sub>) and <sup>13</sup>C NMR (125 MHz, CDCl<sub>3</sub>) of 2b**

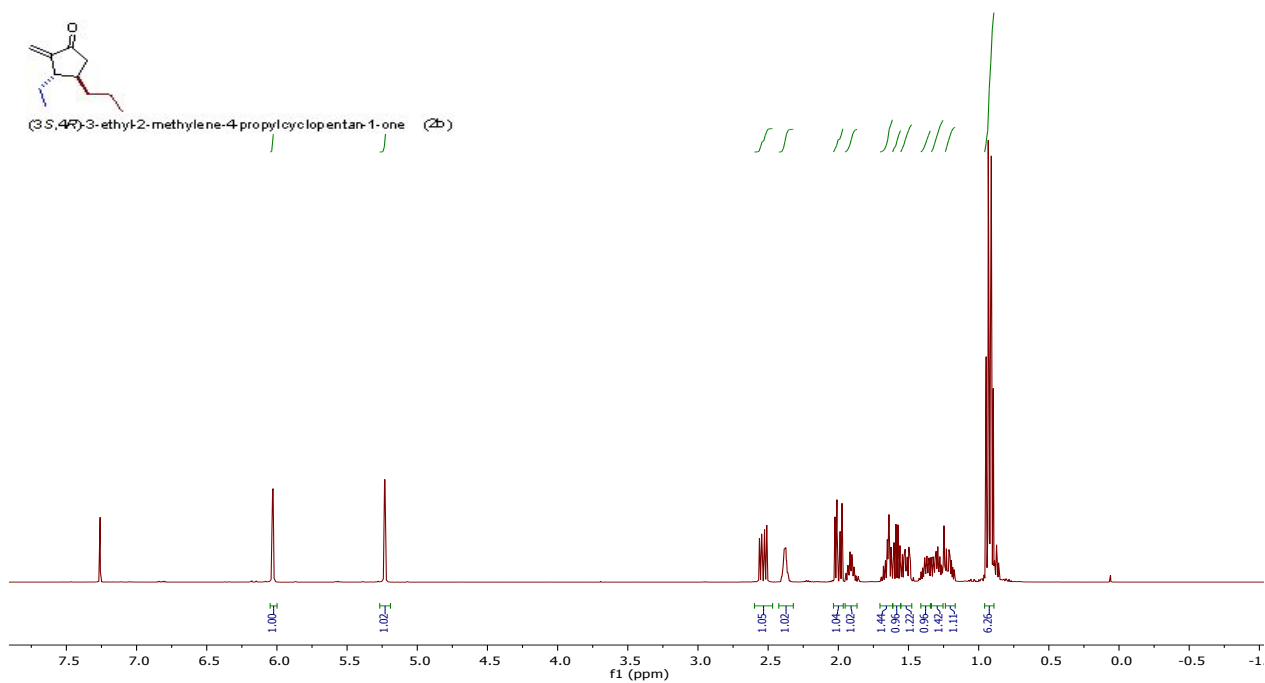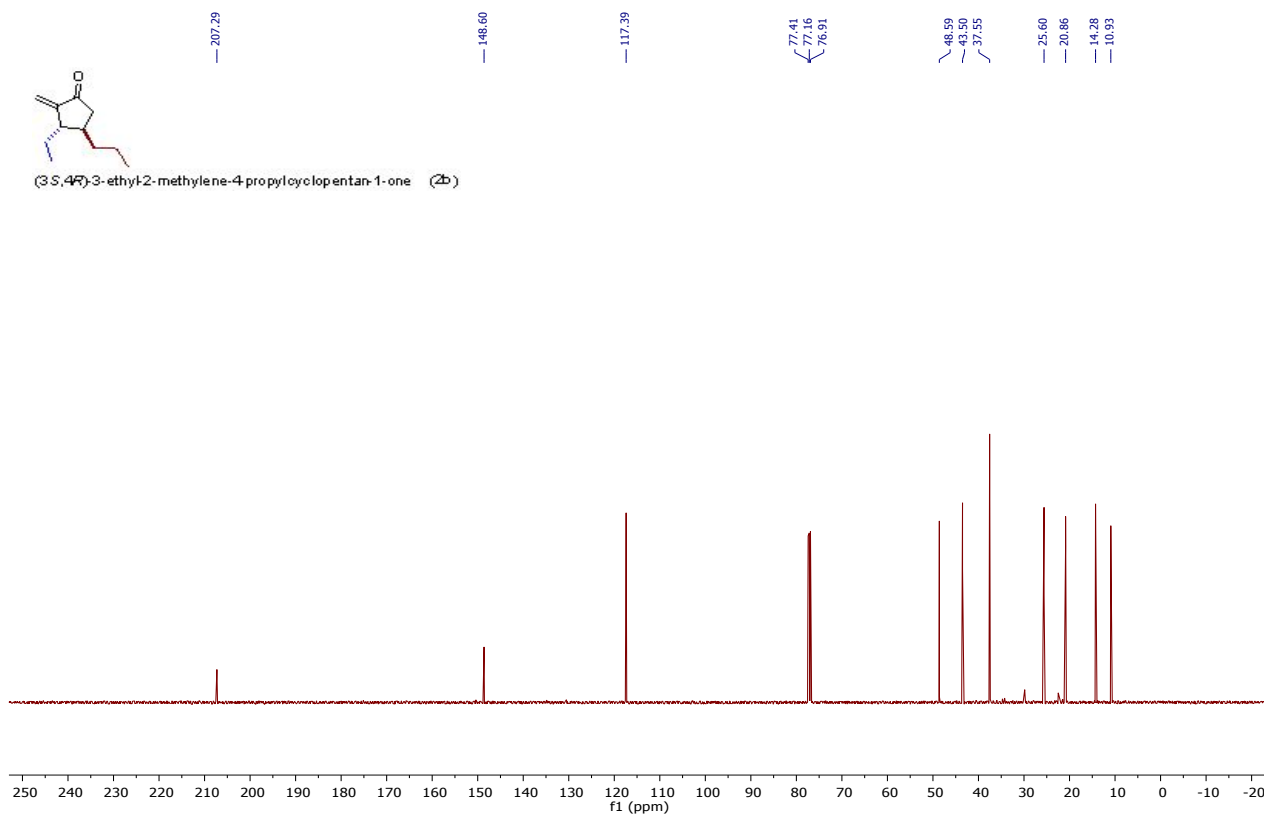

**<sup>1</sup>H NMR (500 MHz, CDCl<sub>3</sub>) and <sup>13</sup>C NMR (125 MHz, CDCl<sub>3</sub>) of 2c**

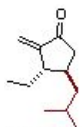

(3*S*,4*R*)-3-ethyl-4-isobutyl-2-methylenecyclopentan-1-one (2c)

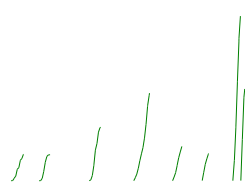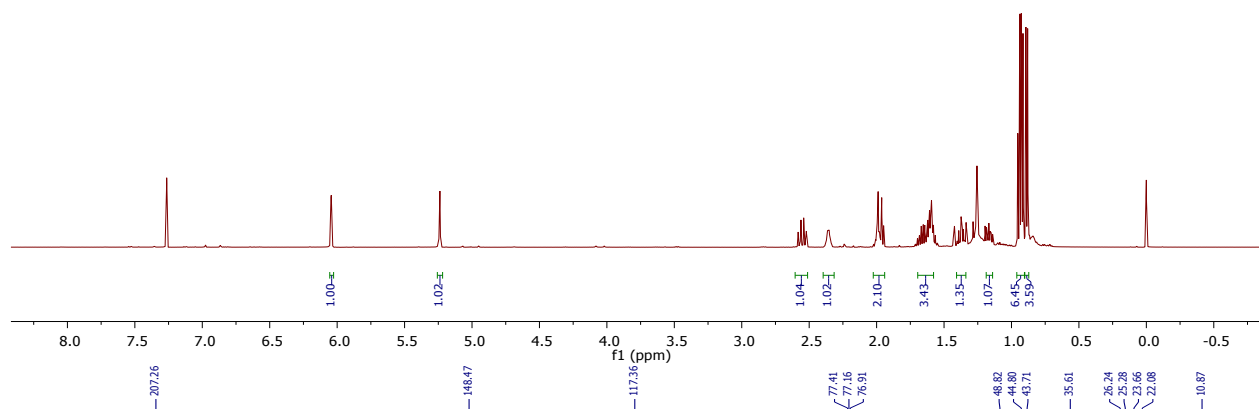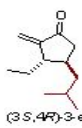

(3*S*,4*R*)-3-ethyl-4-isobutyl-2-methylenecyclopentan-1-one (2c)

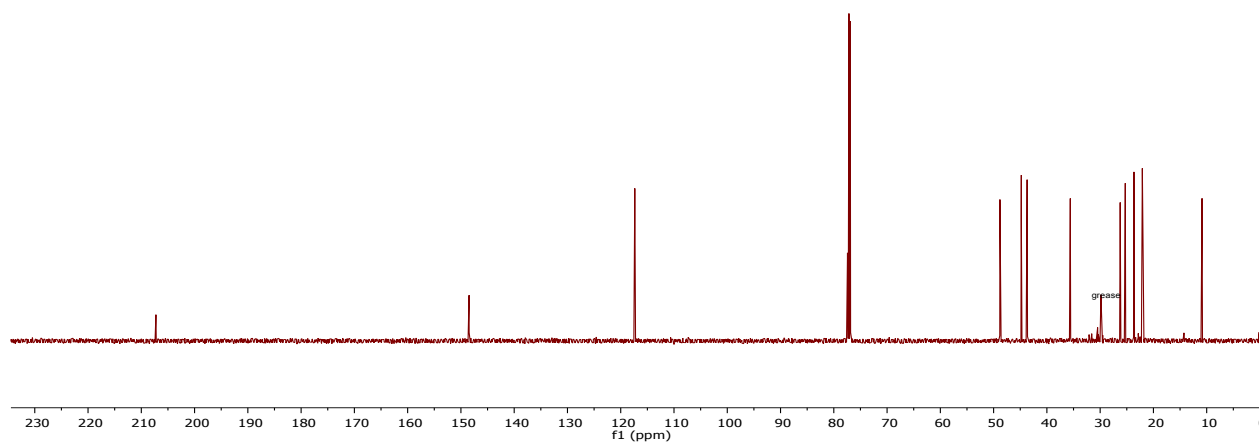

**<sup>1</sup>H NMR (500 MHz, CDCl<sub>3</sub>) and <sup>13</sup>C NMR (125 MHz, CDCl<sub>3</sub>) of 2d**

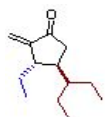

(3*S*,4*S*)-3-ethyl-2-methylene-4-(pentan-3-yl)cyclopentan-1-one (2d)

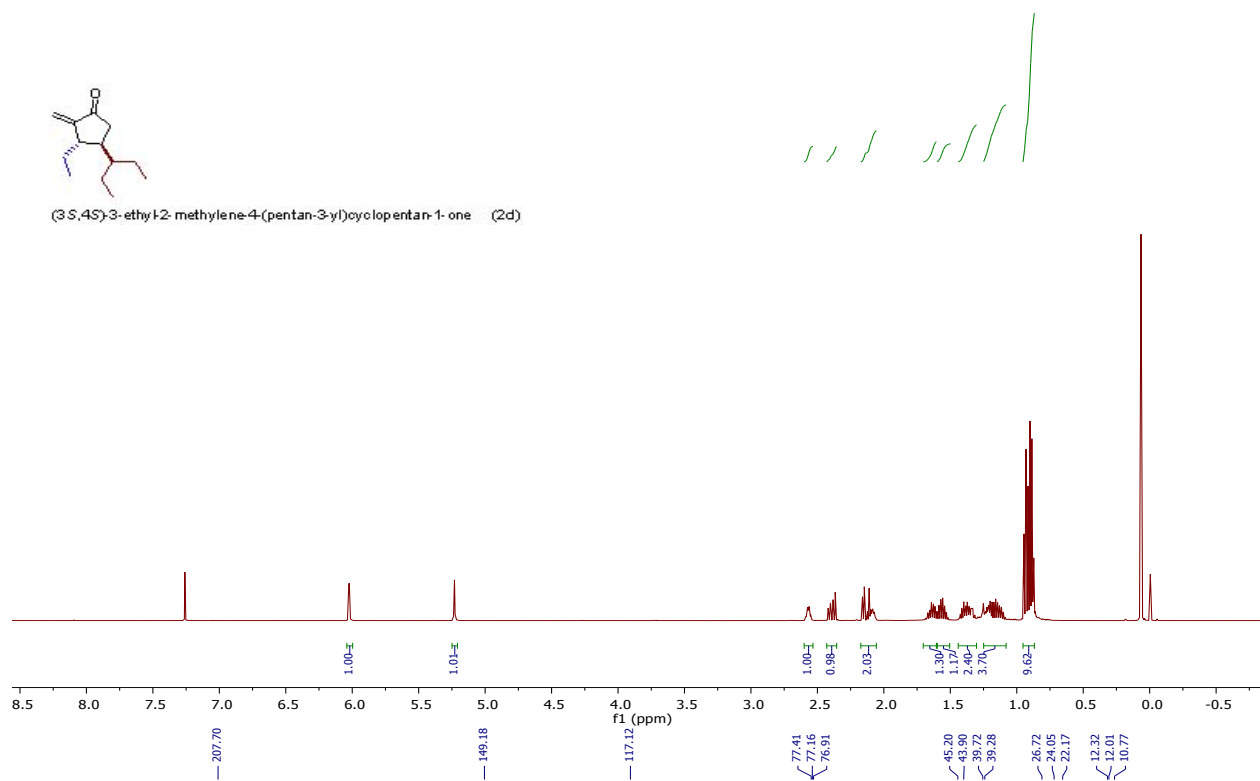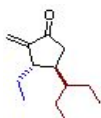

(3*S*,4*S*)-3-ethyl-2-methylene-4-(pentan-3-yl)cyclopentan-1-one (2d)

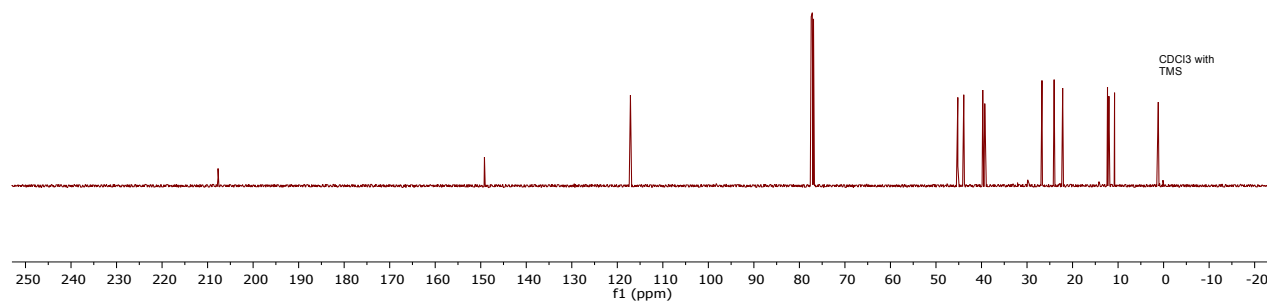

**<sup>1</sup>H NMR (500 MHz, CDCl<sub>3</sub>) and <sup>13</sup>C NMR (125 MHz, CDCl<sub>3</sub>) of 2e**

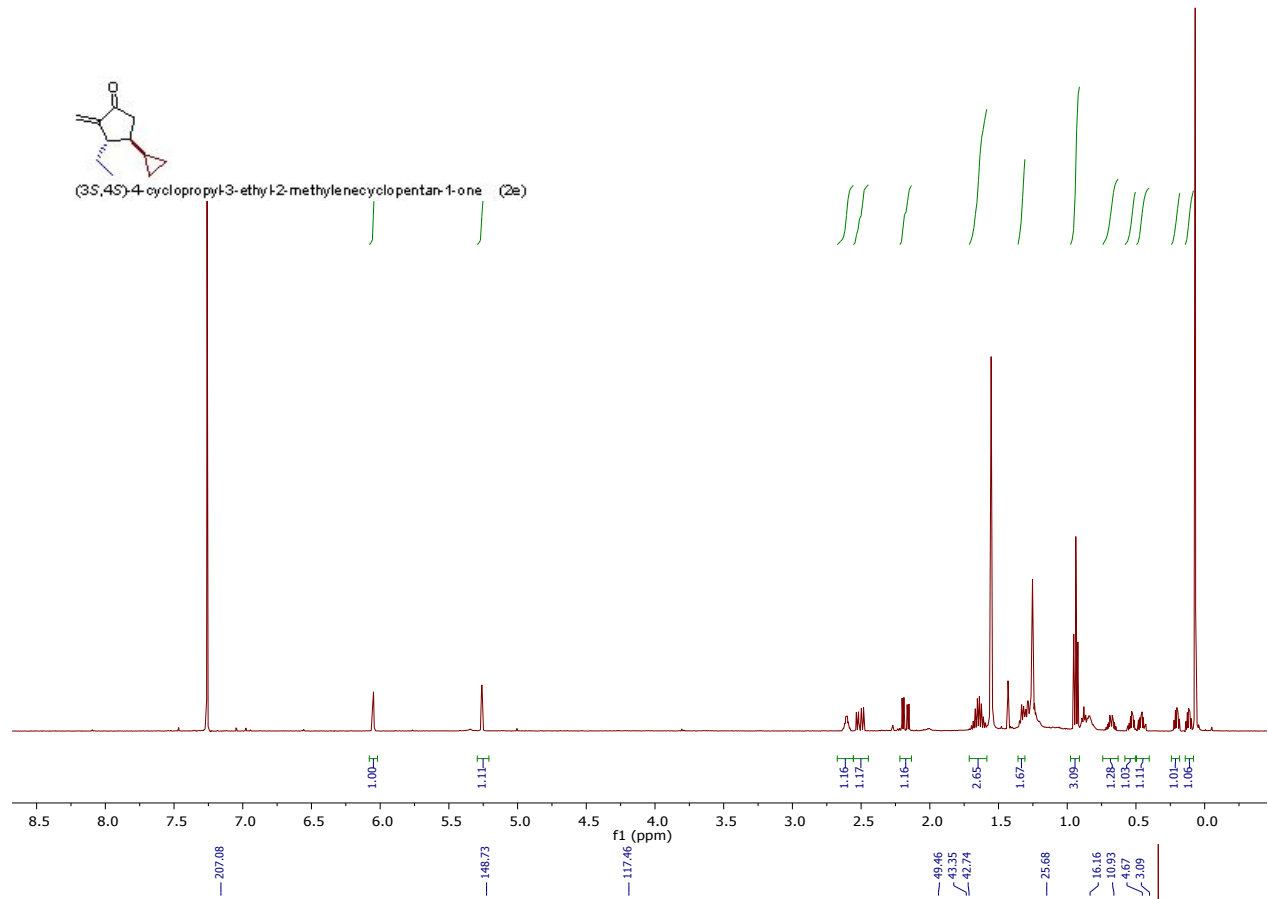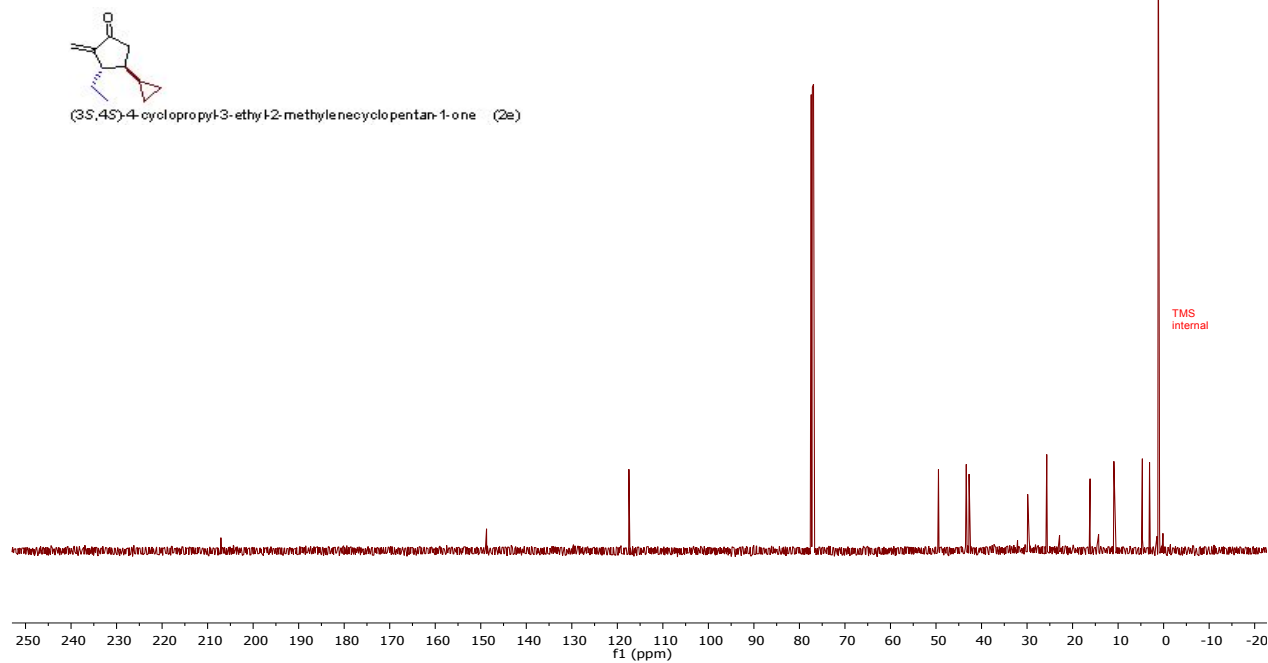

**<sup>1</sup>H NMR (500 MHz, CDCl<sub>3</sub>) and <sup>13</sup>C NMR (125 MHz, CDCl<sub>3</sub>) of 3e**

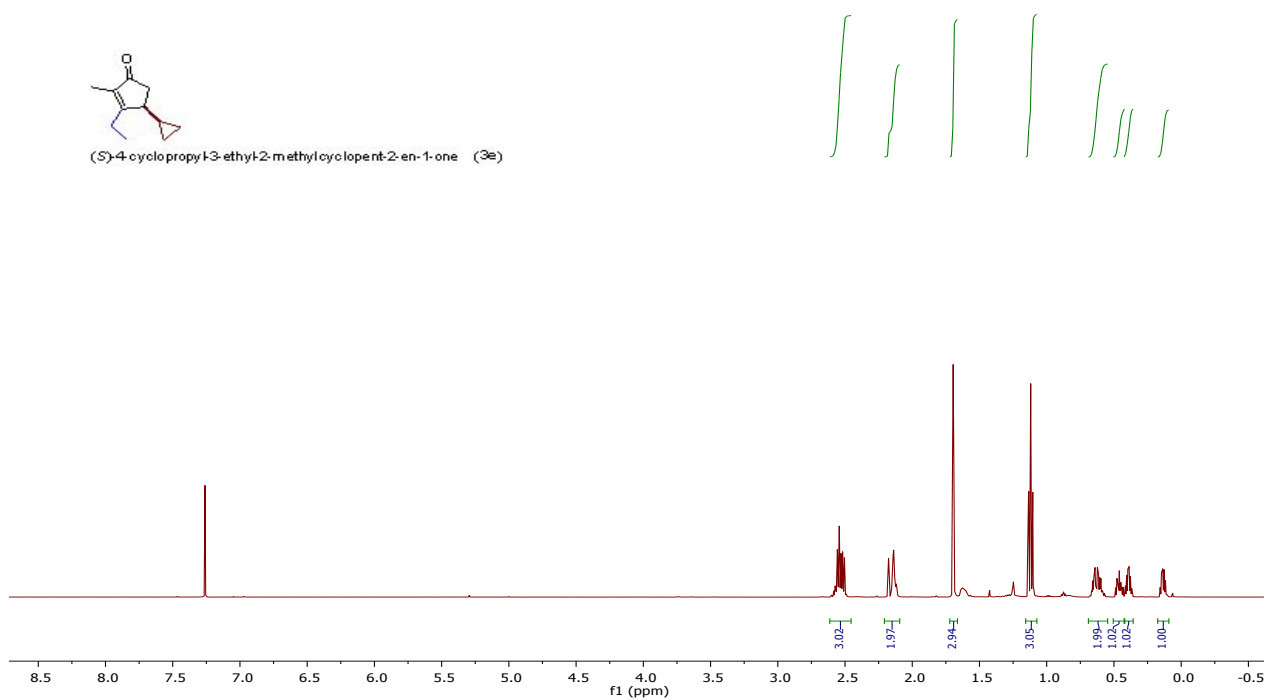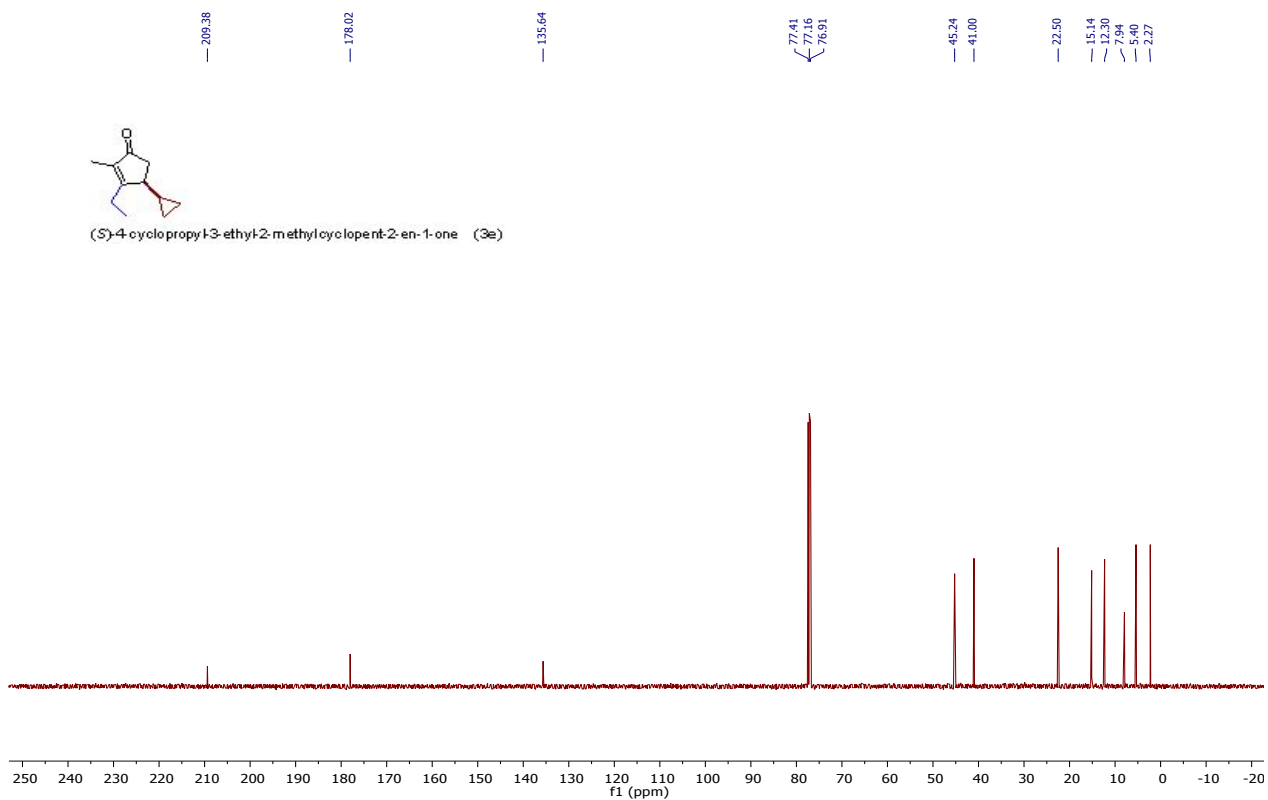



**$^1\text{H}$  NMR (500 MHz,  $\text{CDCl}_3$ ) and  $^{13}\text{C}$  NMR (125 MHz,  $\text{CDCl}_3$ ) of **2f****

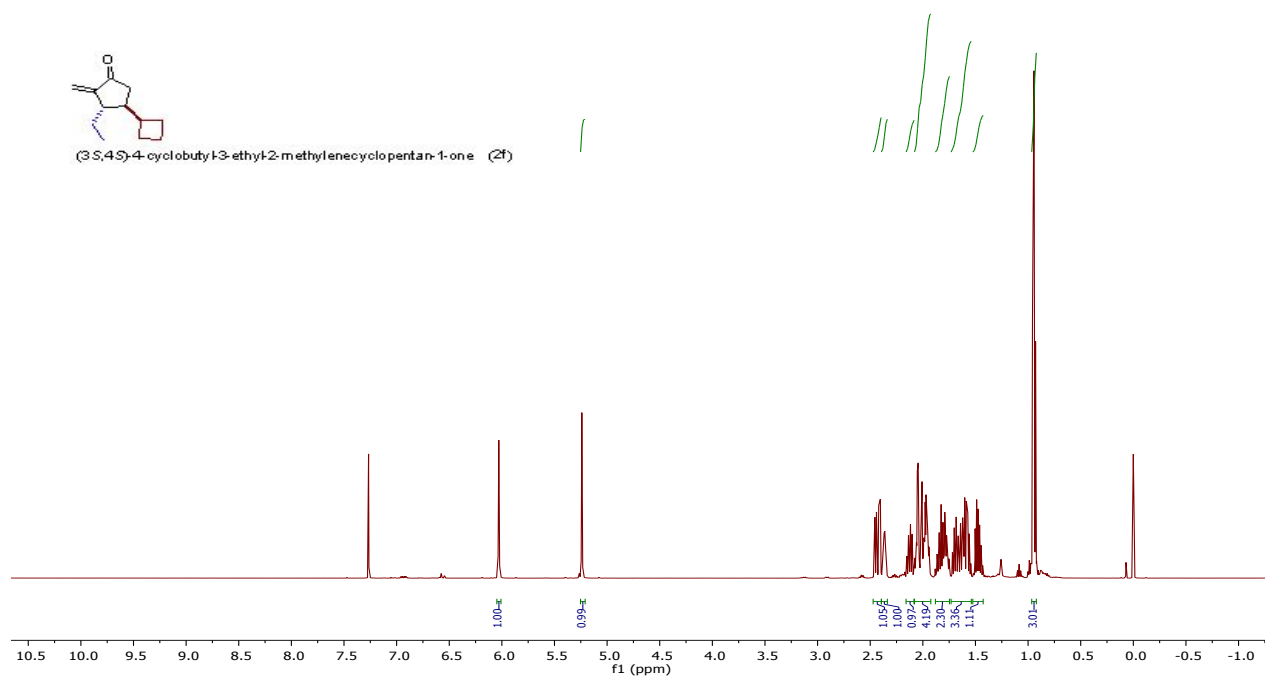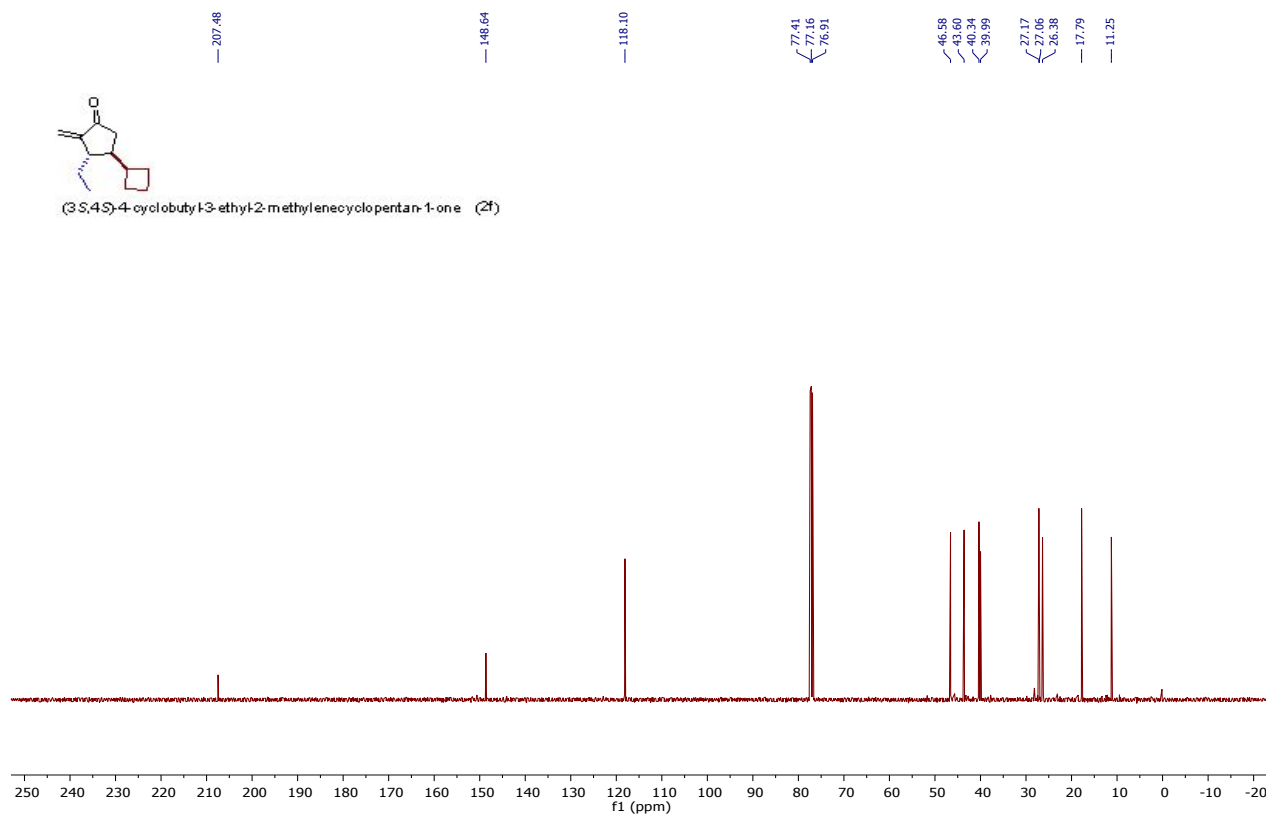

**$^1\text{H}$  NMR (500 MHz,  $\text{CDCl}_3$ ) and  $^{13}\text{C}$  NMR (125 MHz,  $\text{CDCl}_3$ ) of **2g****

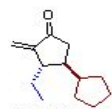

(1*S*,5*S*)-5-ethyl-4-methylene-[1,1'-b(cyclopentan)]-3-one (**2g**)

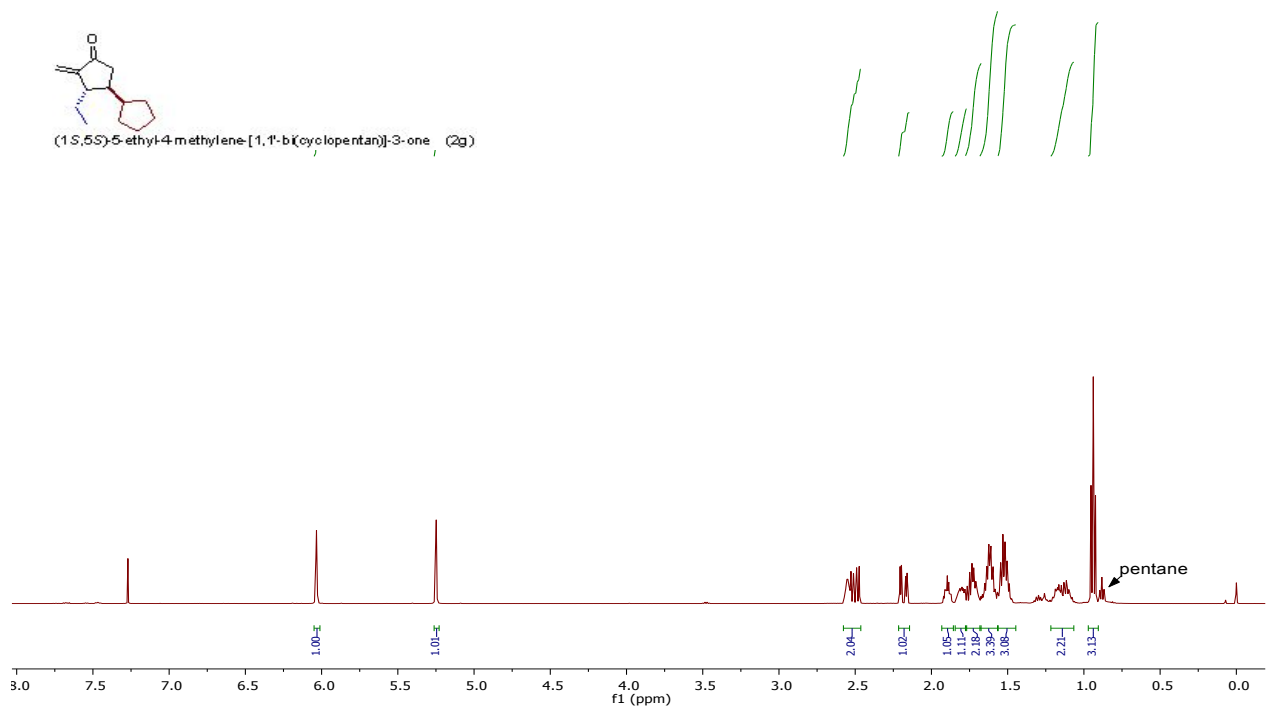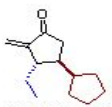

(1*S*,5*S*)-5-ethyl-4-methylene-[1,1'-b(cyclopentan)]-3-one (**2g**)

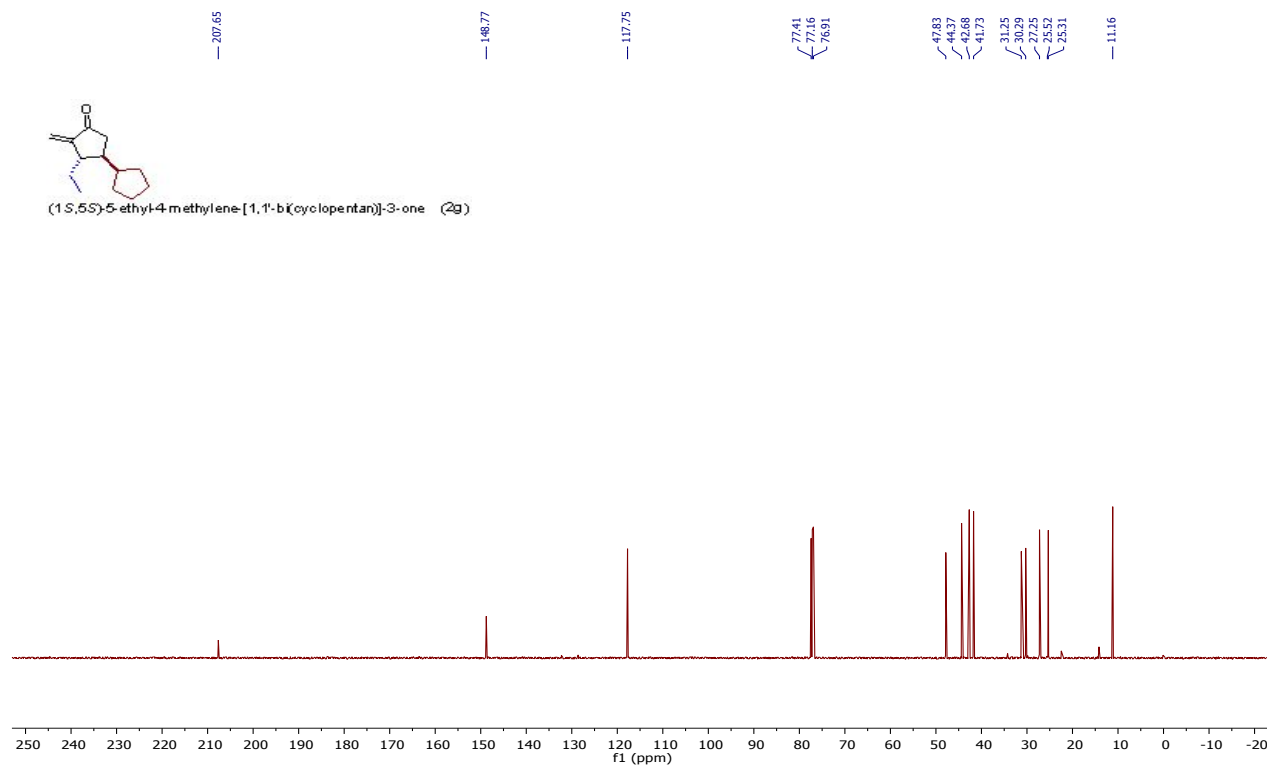

**<sup>1</sup>H NMR (500 MHz, CDCl<sub>3</sub>) and <sup>13</sup>C NMR (125 MHz, CDCl<sub>3</sub>) of 2h**

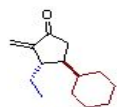

(3*S*,4*S*)-4-cyclohexyl-3-ethyl-2-methylenecyclopentan-1-one (2h)

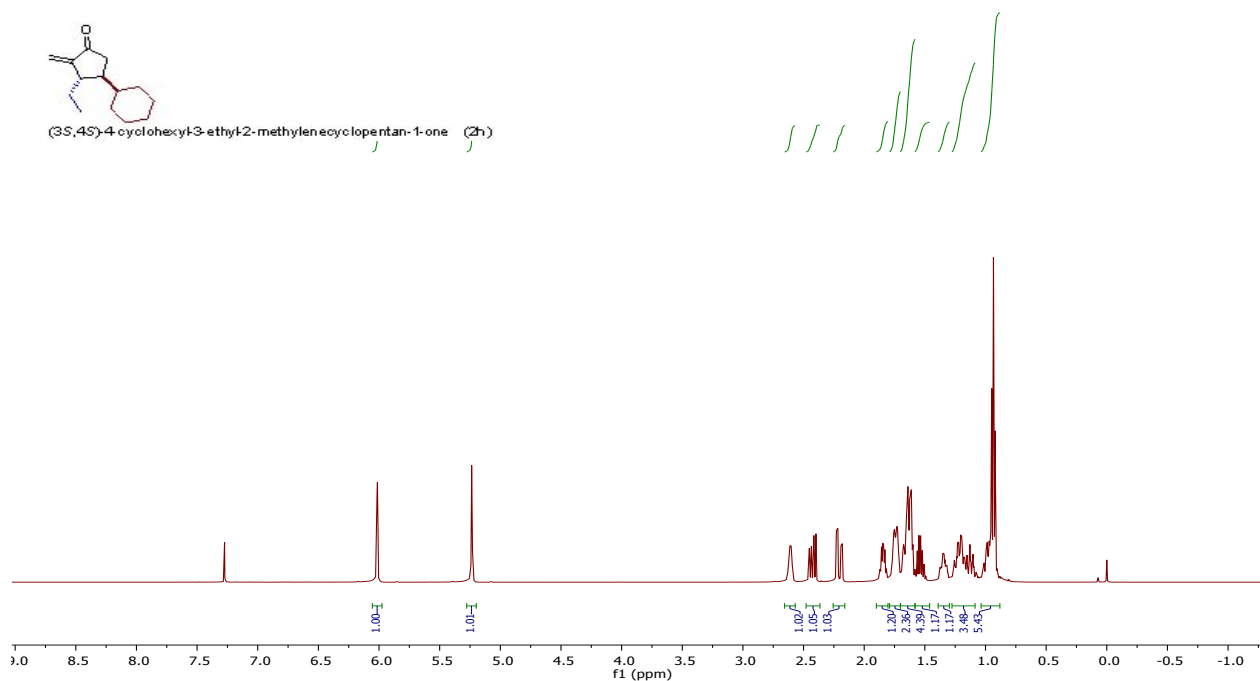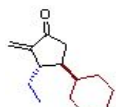

(3*S*,4*S*)-4-cyclohexyl-3-ethyl-2-methylenecyclopentan-1-one (2h)

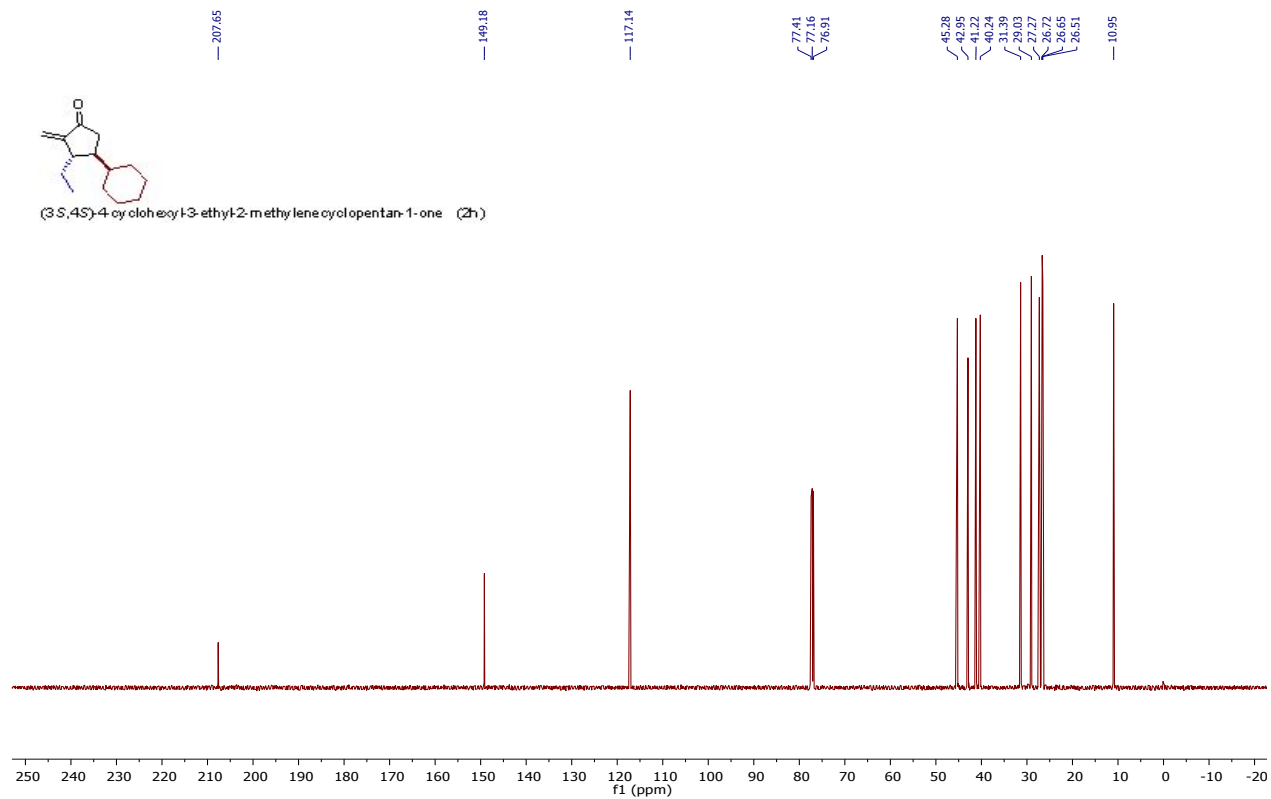

**<sup>1</sup>H NMR (500 MHz, CDCl<sub>3</sub>) and <sup>13</sup>C NMR (125 MHz, CDCl<sub>3</sub>) of **2i****

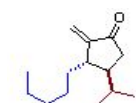

(3*S*,4*S*)-4-isopropyl-2-methylene-3-pentylcyclopentan-1-one (**2i**)

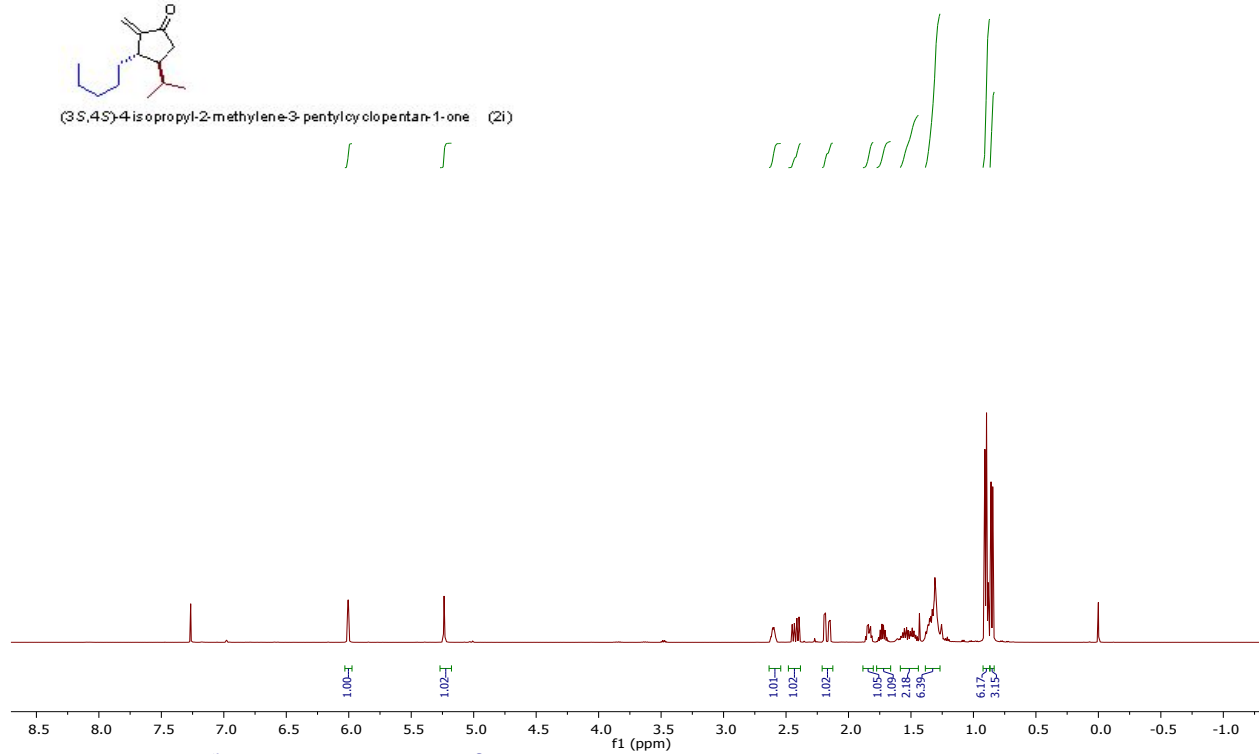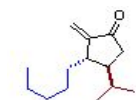

(3*S*,4*S*)-4-isopropyl-2-methylene-3-pentylcyclopentan-1-one (**2i**)

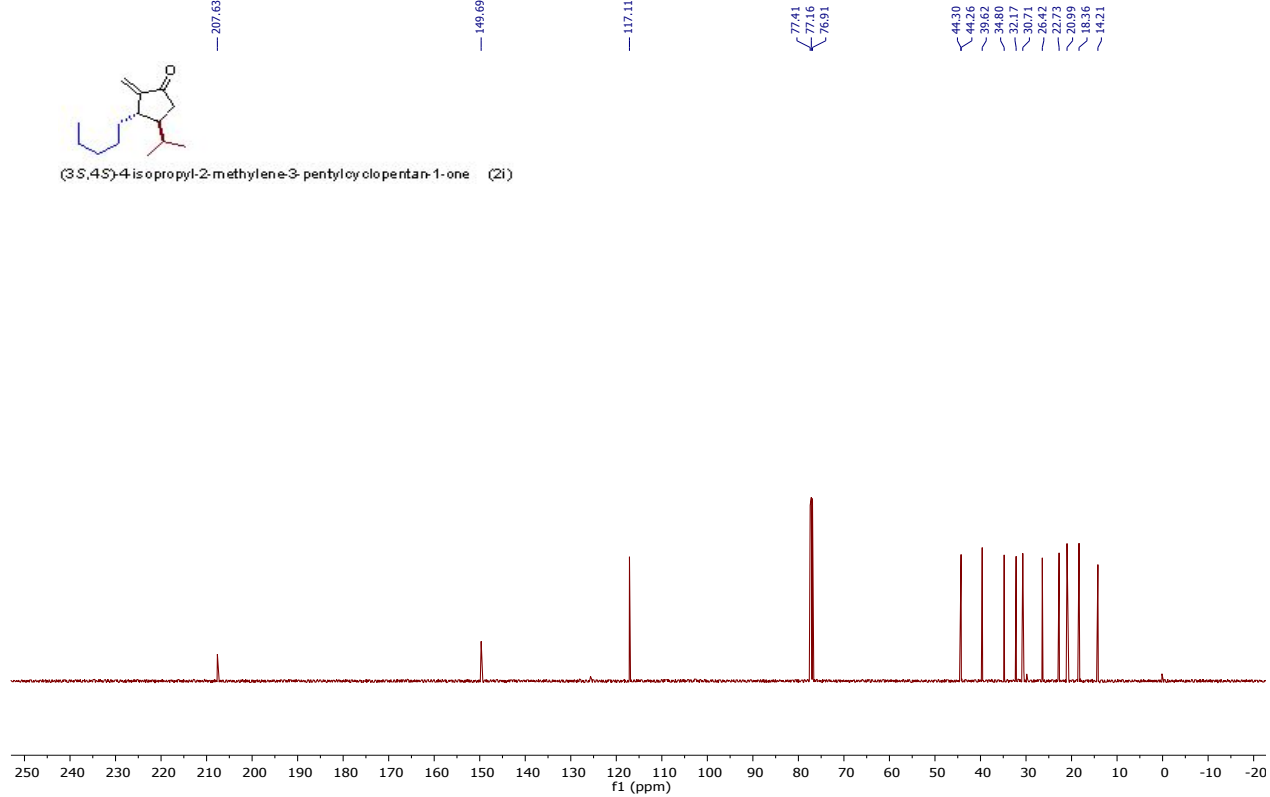

**<sup>1</sup>H NMR (500 MHz, CDCl<sub>3</sub>) and <sup>13</sup>C NMR (125 MHz, CDCl<sub>3</sub>) of 2j**

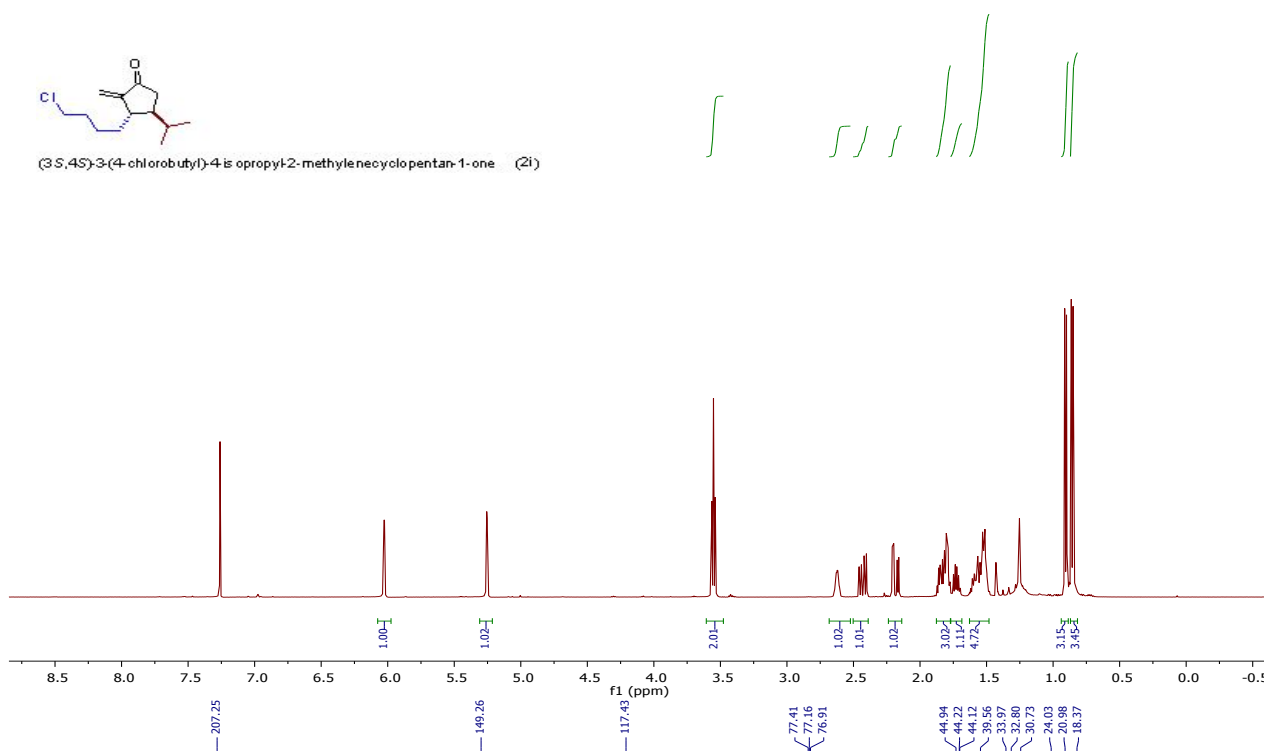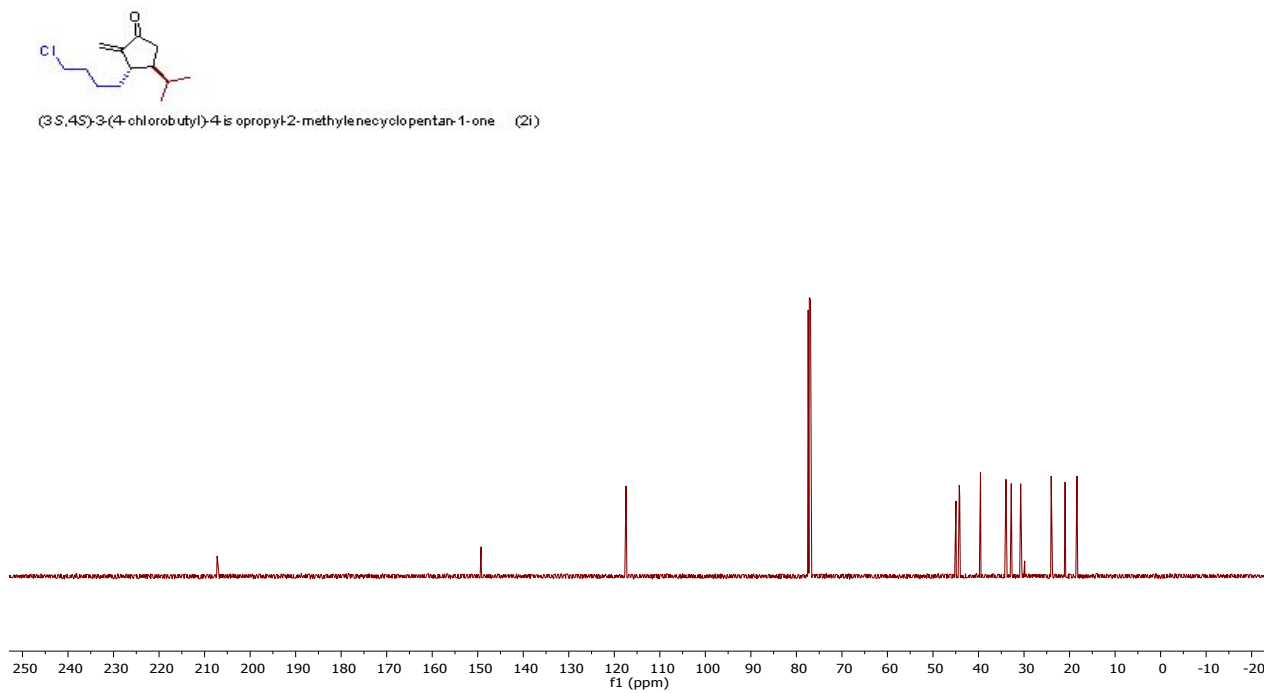

**<sup>1</sup>H NMR (500 MHz, CDCl<sub>3</sub>) and <sup>13</sup>C NMR (125 MHz, CDCl<sub>3</sub>) of 2k**

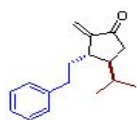

(3*S*,4*S*)-4-isopropyl-2-methylene-3-phenethylcyclopentan-1-one (2k)

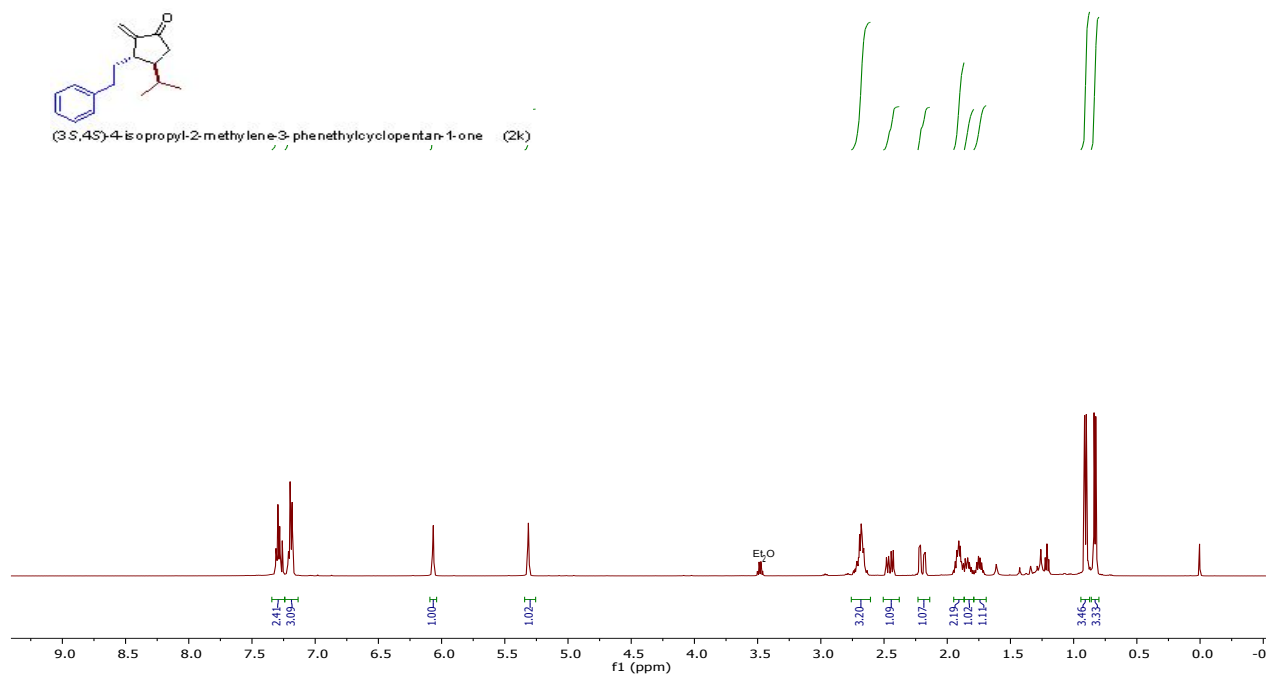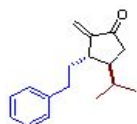

(3*S*,4*S*)-4-isopropyl-2-methylene-3-phenethylcyclopentan-1-one (2k)

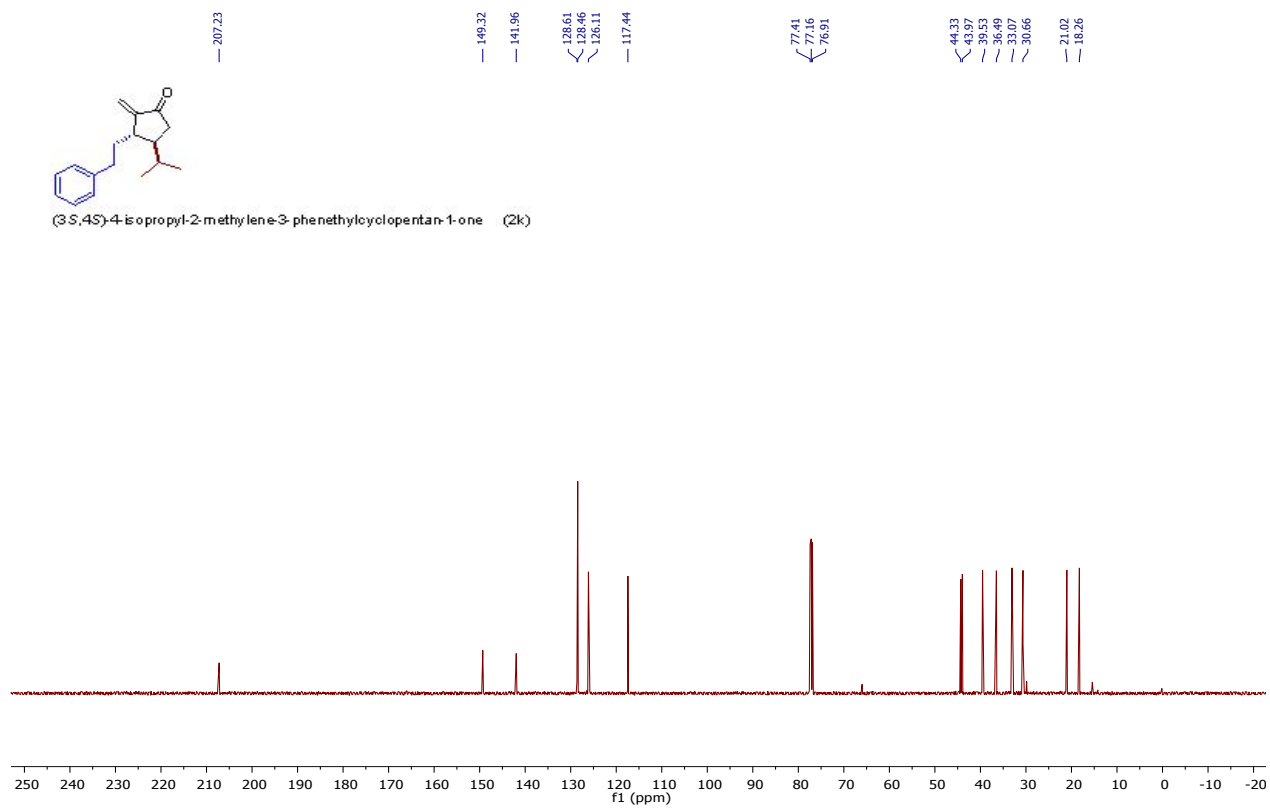

**<sup>1</sup>H NMR (500 MHz, CDCl<sub>3</sub>) and <sup>13</sup>C NMR (125 MHz, CDCl<sub>3</sub>) of 3k**

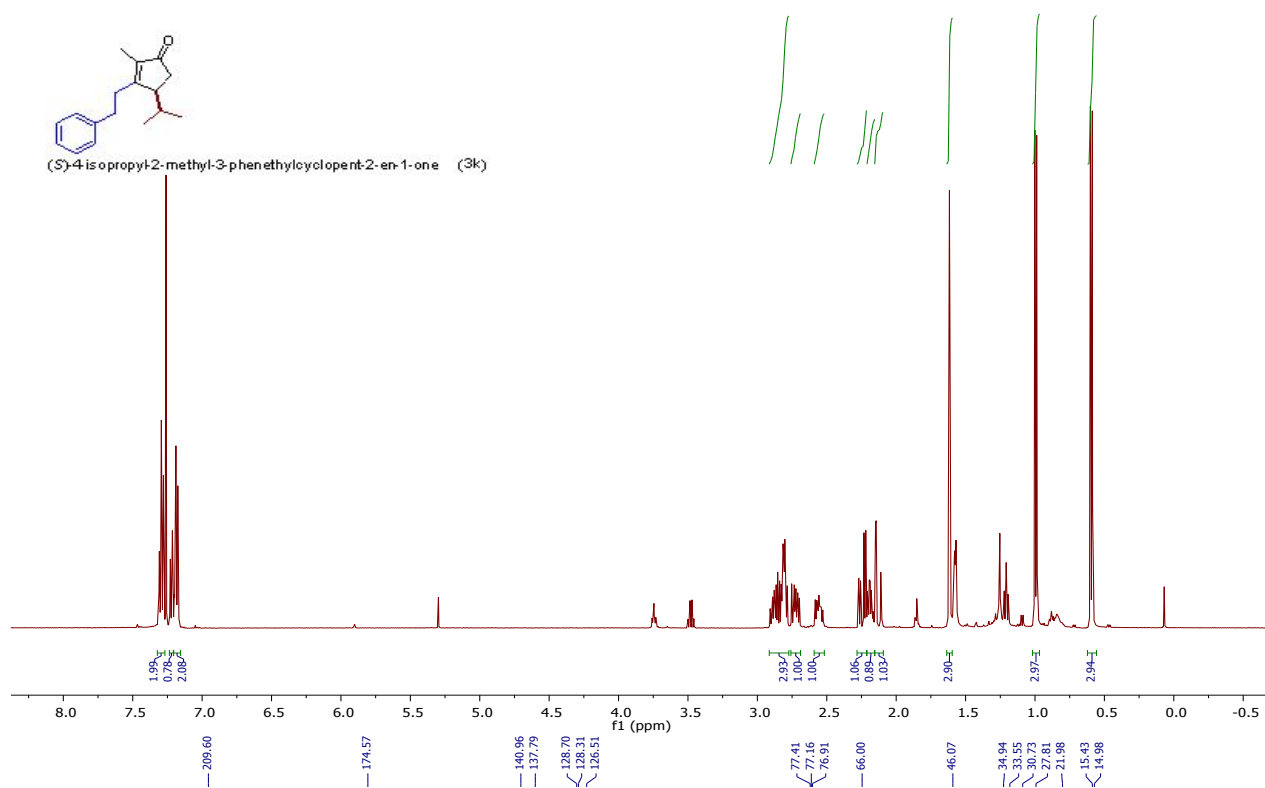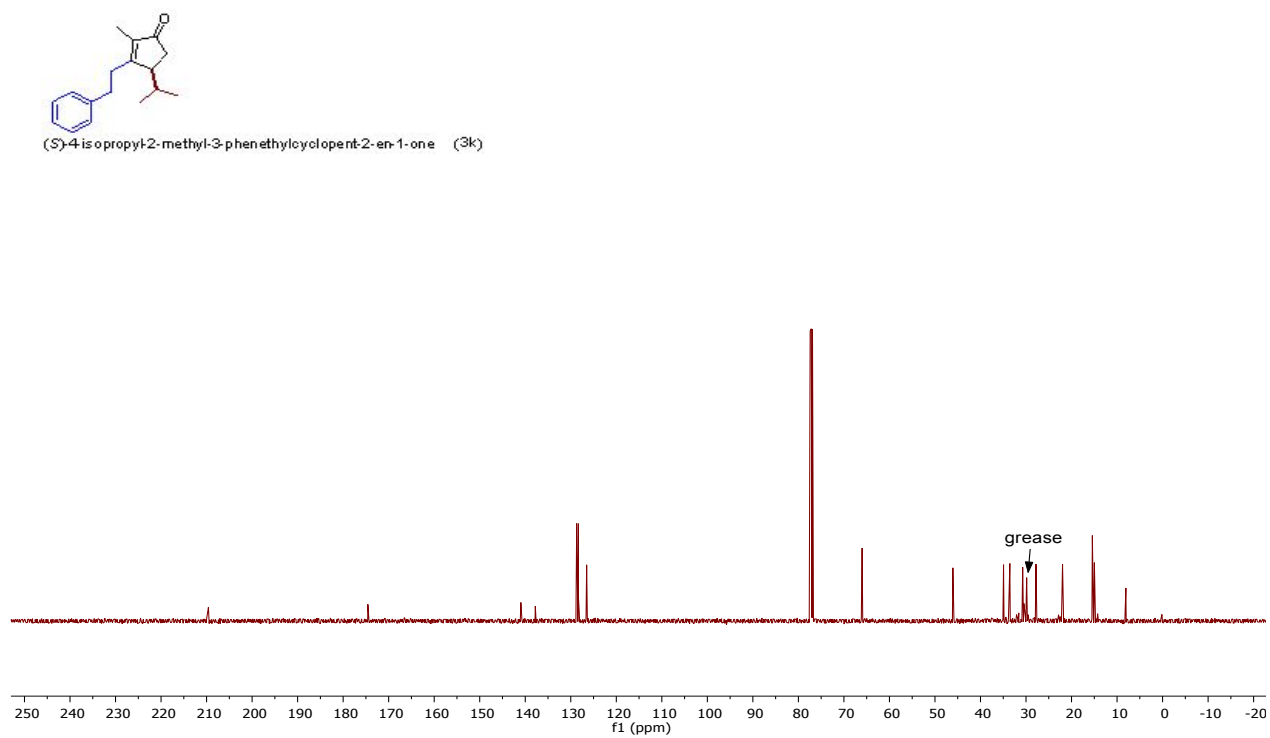





**<sup>1</sup>H NMR (500 MHz, CDCl<sub>3</sub>) and <sup>13</sup>C NMR (125 MHz, CDCl<sub>3</sub>) of 2m**

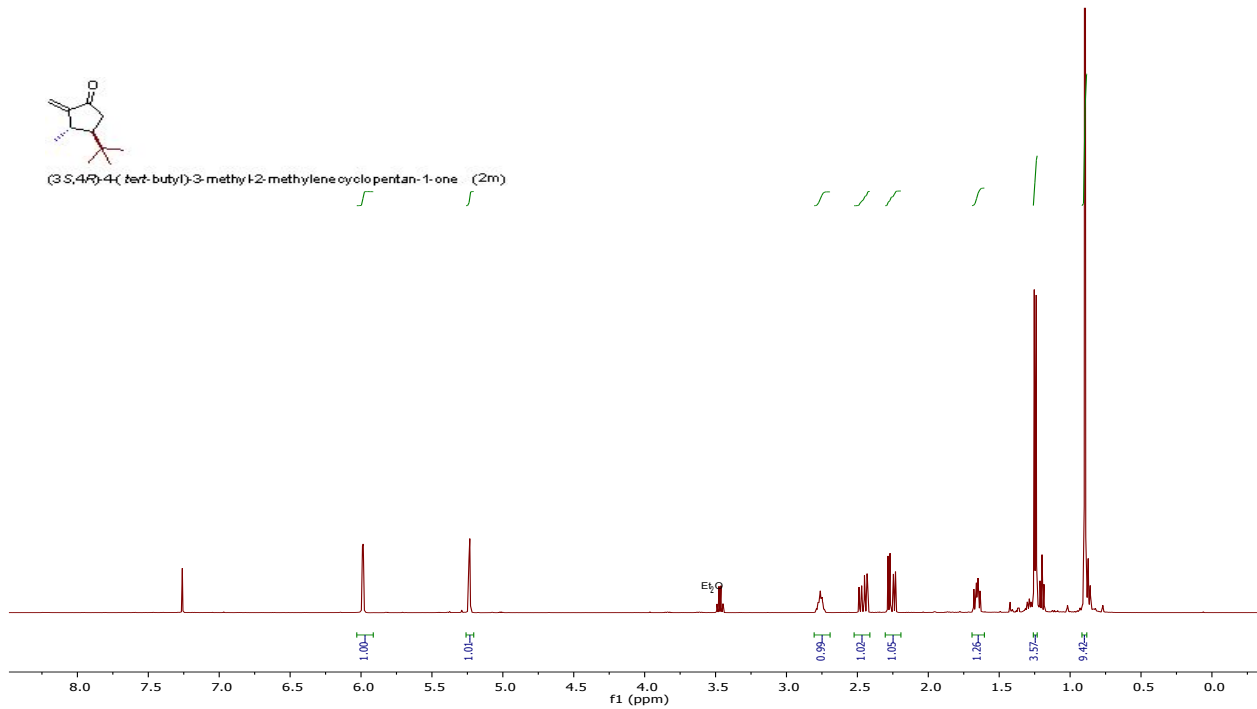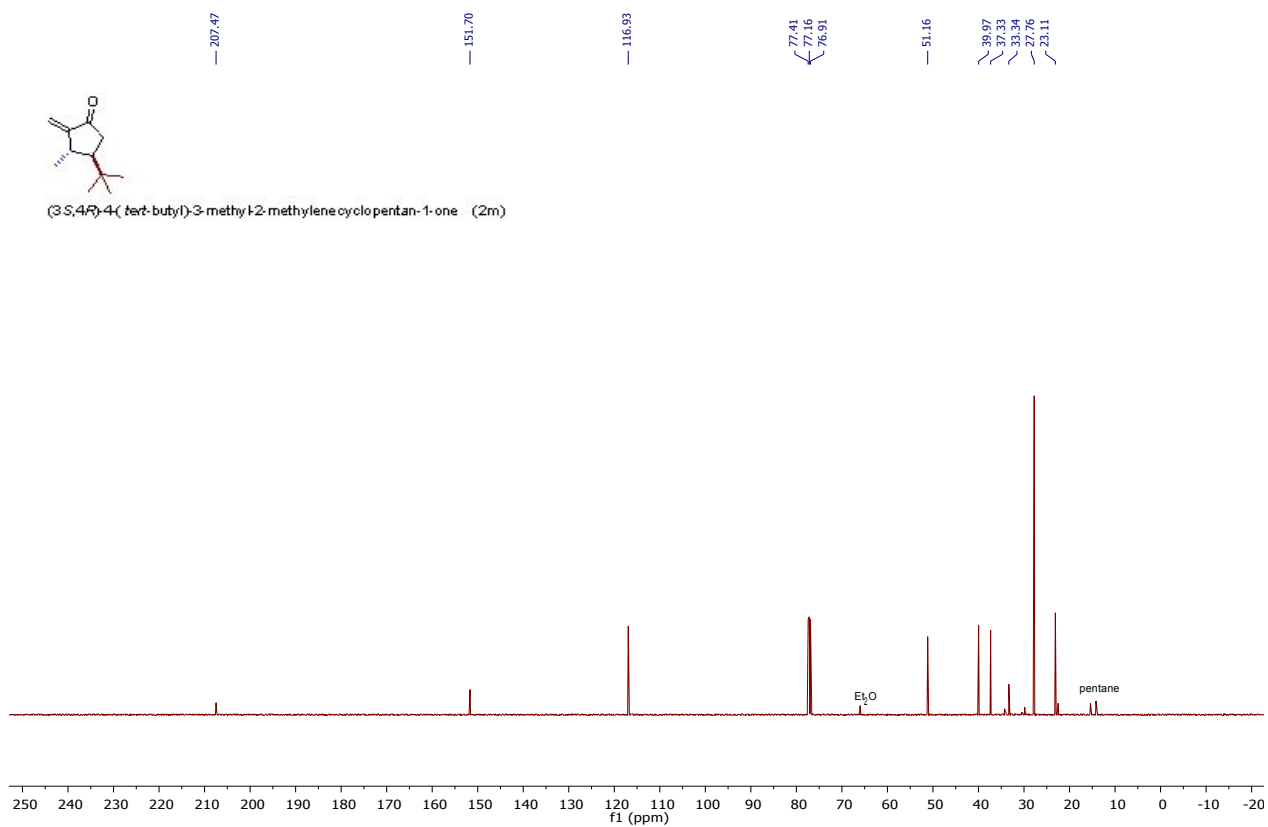

**$^1\text{H}$  NMR (500 MHz,  $\text{CDCl}_3$ ) and  $^{13}\text{C}$  NMR (125 MHz,  $\text{CDCl}_3$ ) of **2n****

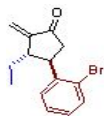

(3S,4R)-4-(2-bromophenyl)-3-ethyl-2-methylenecyclopentan-1-one (2n)

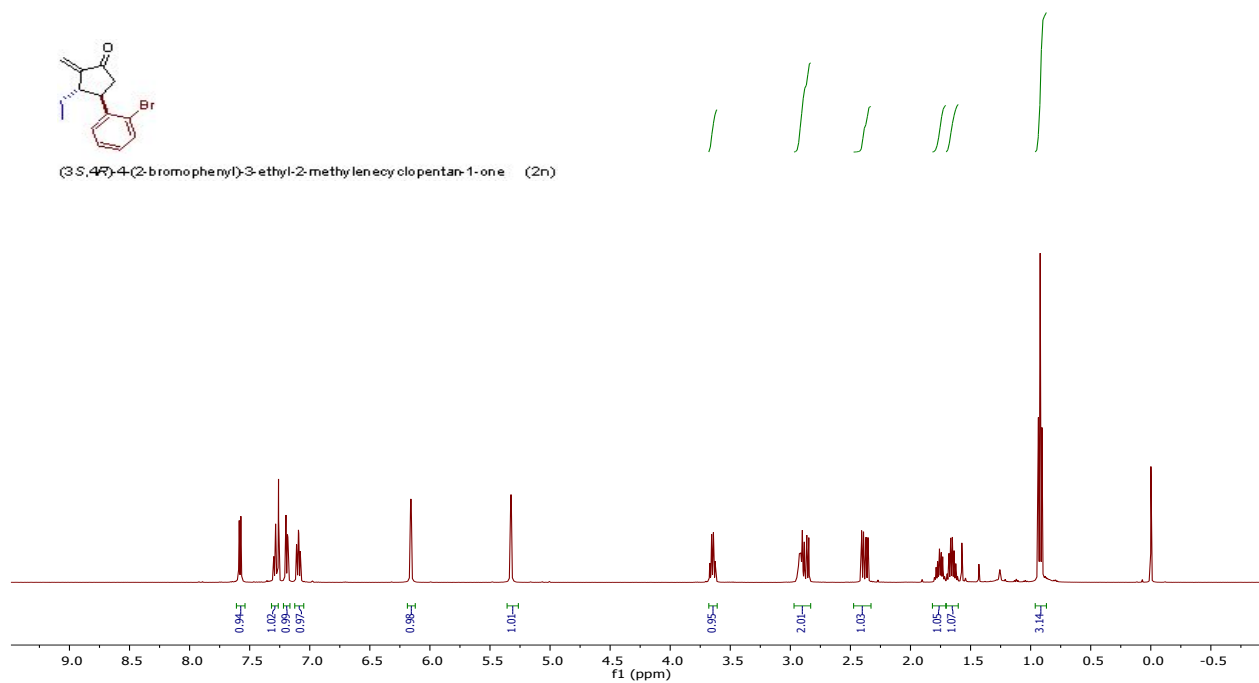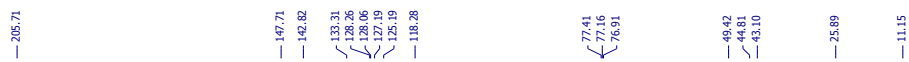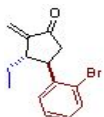

(3S,4R)-4-(2-bromophenyl)-3-ethyl-2-methylenecyclopentan-1-one (2n)

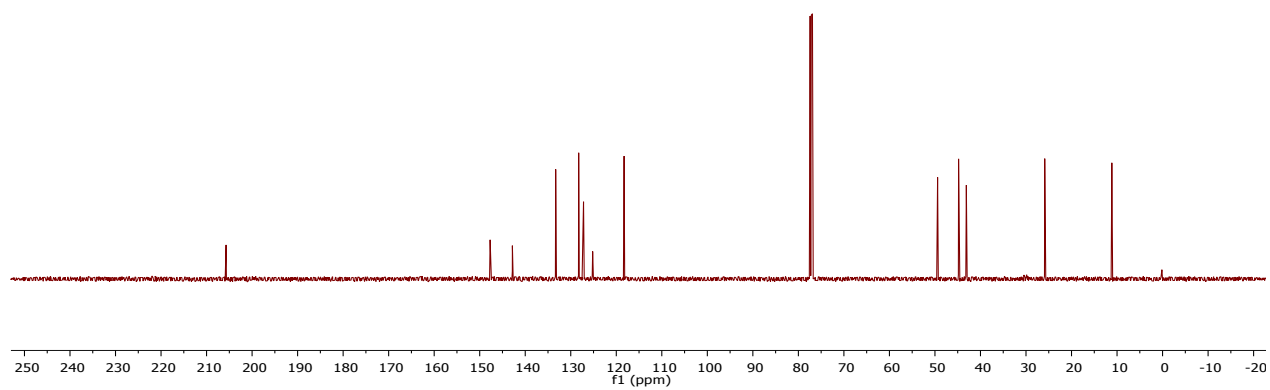

**<sup>1</sup>H NMR (500 MHz, CDCl<sub>3</sub>) and <sup>13</sup>C NMR (125 MHz, CDCl<sub>3</sub>) of 7**

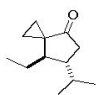

(6*R*,7*R*)-7-ethyl-6-isopropylspiro[2.4]heptan-4-one (7)

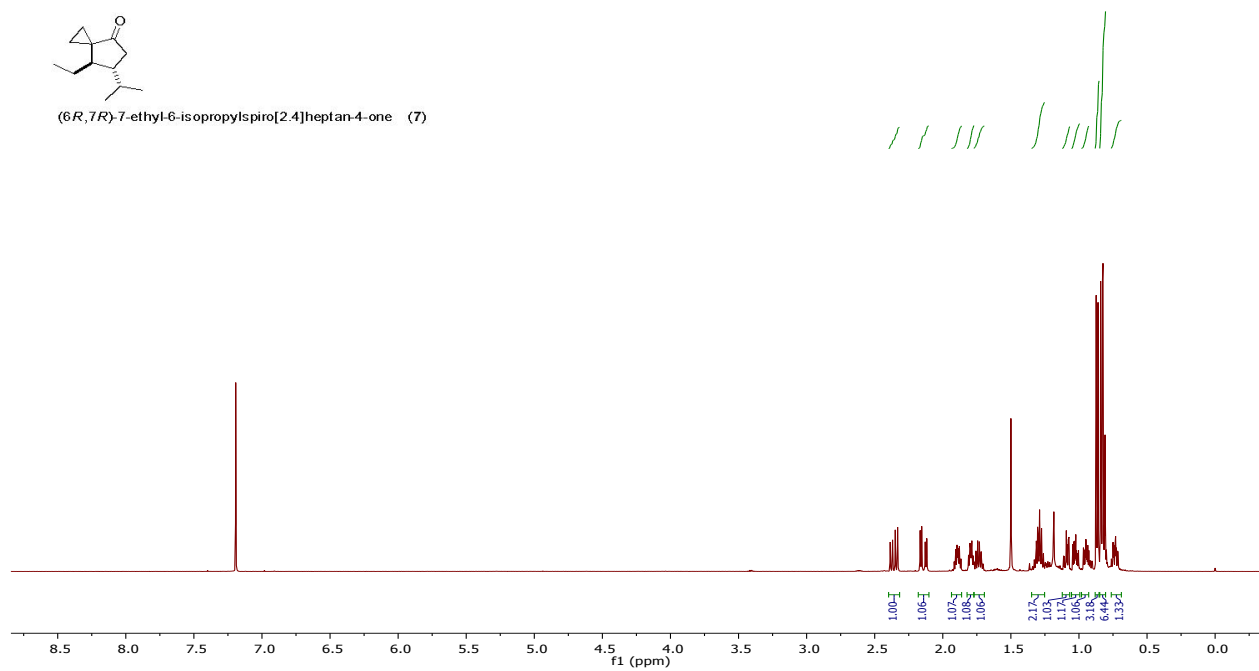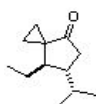

(6*R*,7*R*)-7-ethyl-6-isopropylspiro[2.4]heptan-4-one (7)

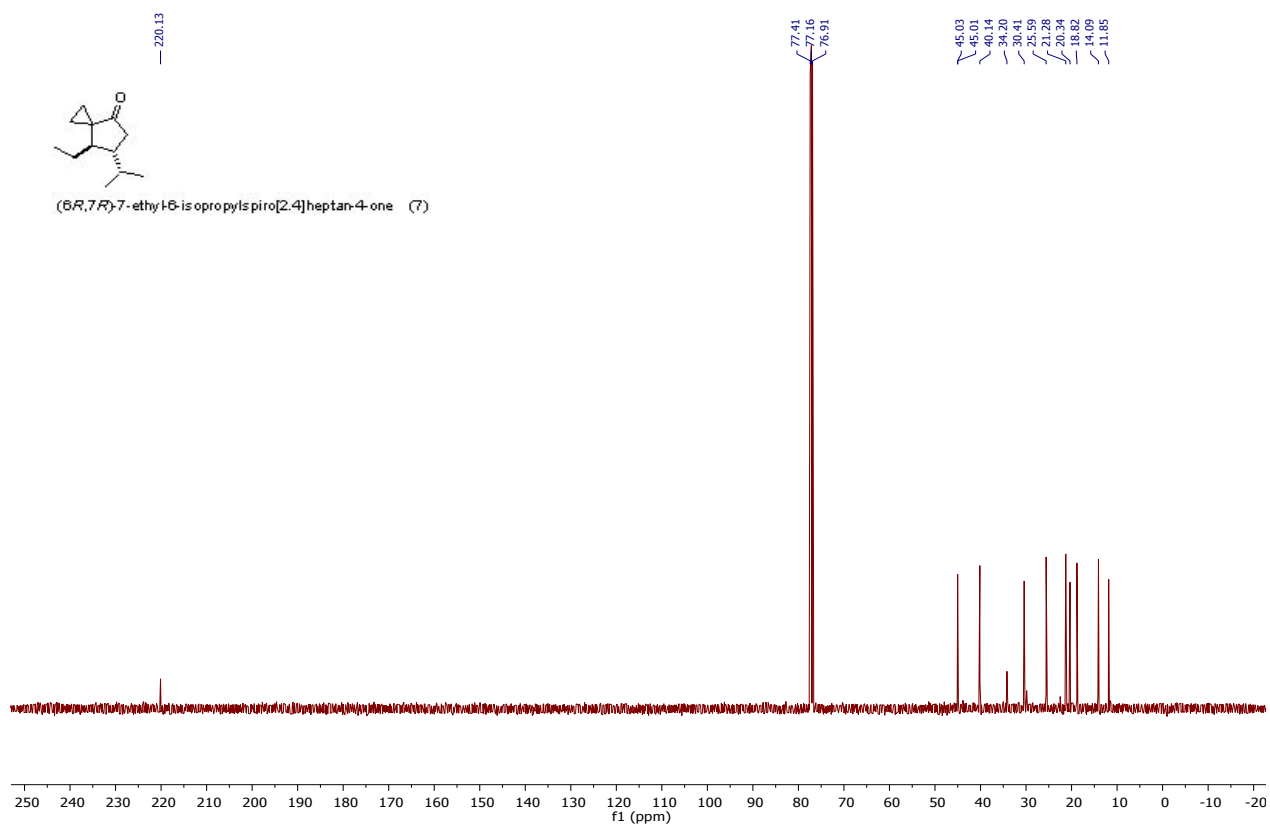

$^1\text{H}$  NMR (500 MHz,  $\text{CDCl}_3$ ) and  $^{13}\text{C}$  NMR (125 MHz,  $\text{CDCl}_3$ ) of **3a**

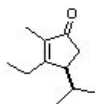

(S)-3-ethyl-4-isopropyl-2-methylcyclopent-2-en-1-one (**3a**)

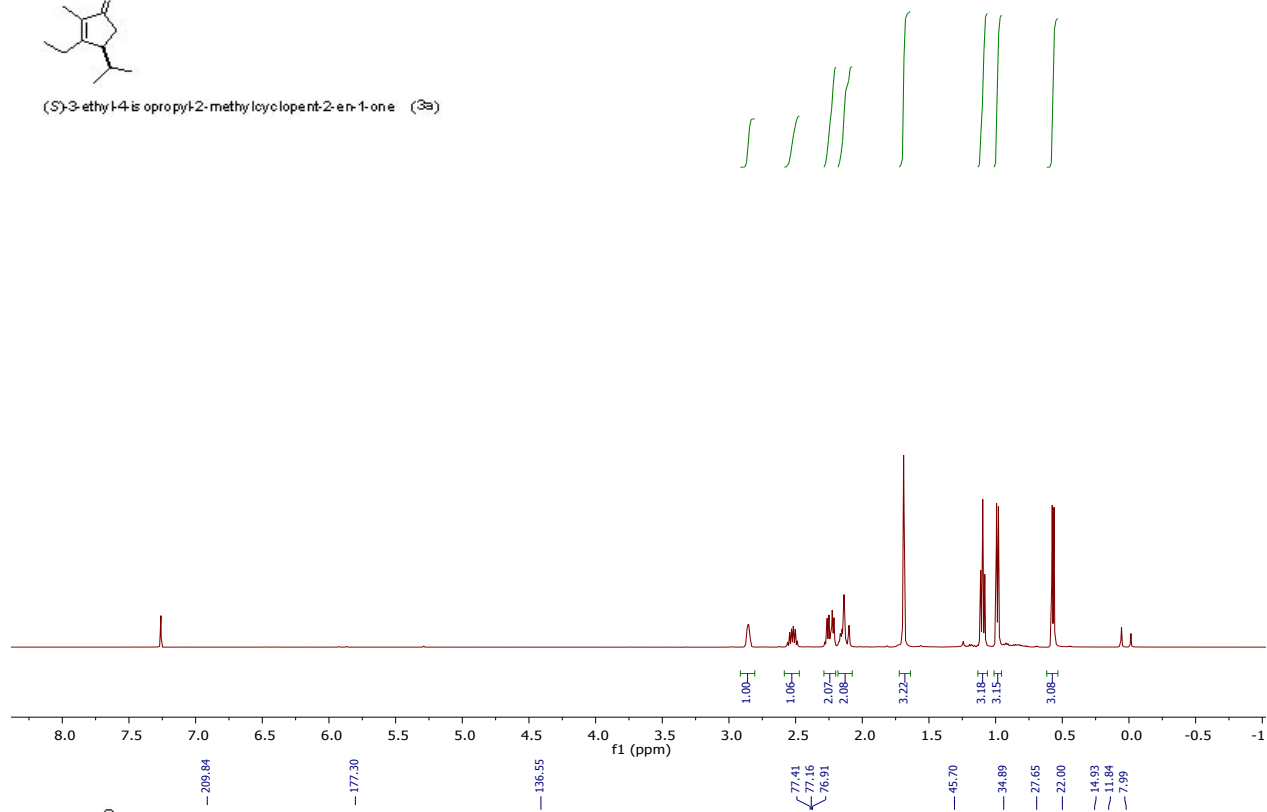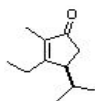

(S)-3-ethyl-4-isopropyl-2-methylcyclopent-2-en-1-one (**3a**)

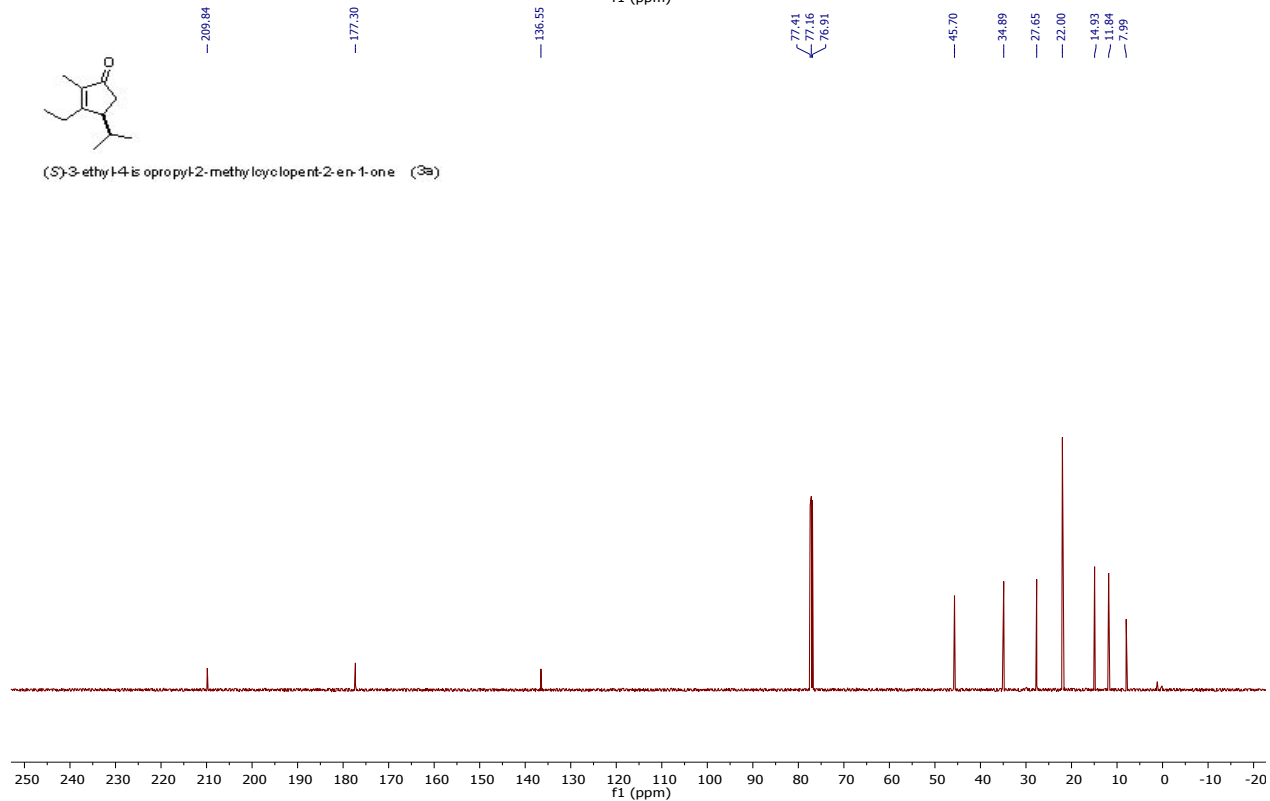

**<sup>1</sup>H NMR (500 MHz, CDCl<sub>3</sub>) and <sup>13</sup>C NMR (125 MHz, CDCl<sub>3</sub>) of 9**

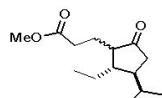

methyl 3-((2*S*,3*S*)-2-ethyl-3-isopropyl-5-oxocyclopentyl)propanoate (**9**)

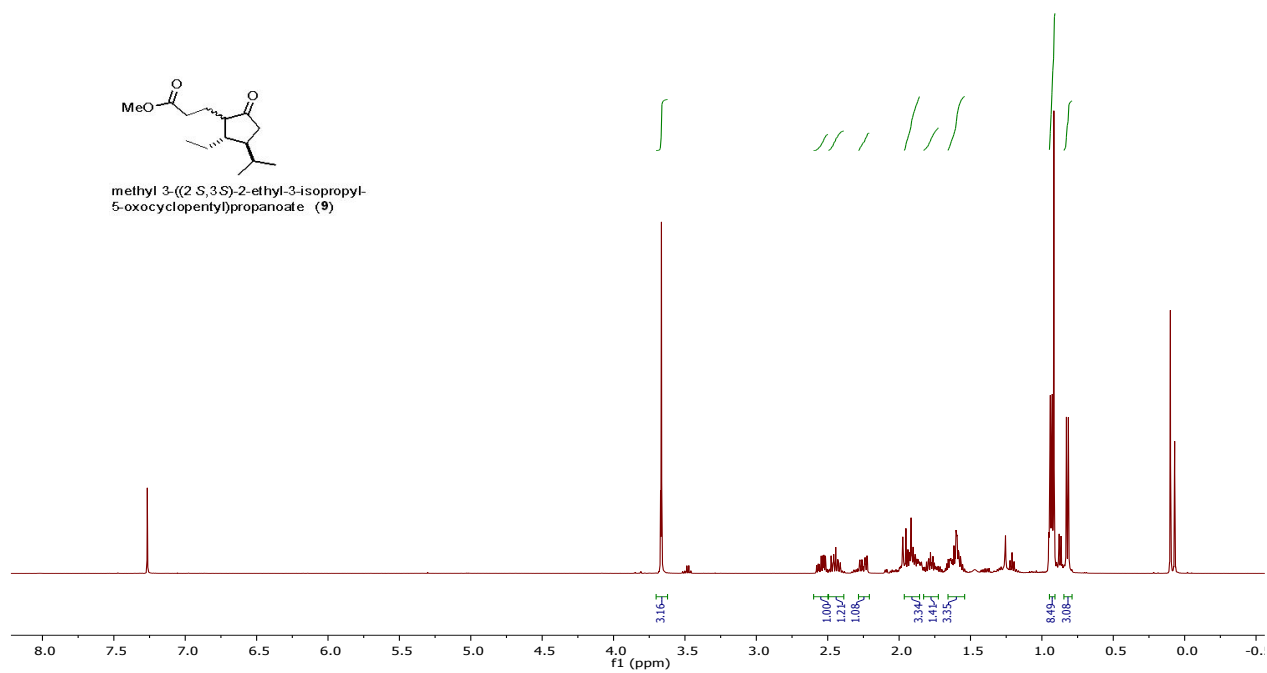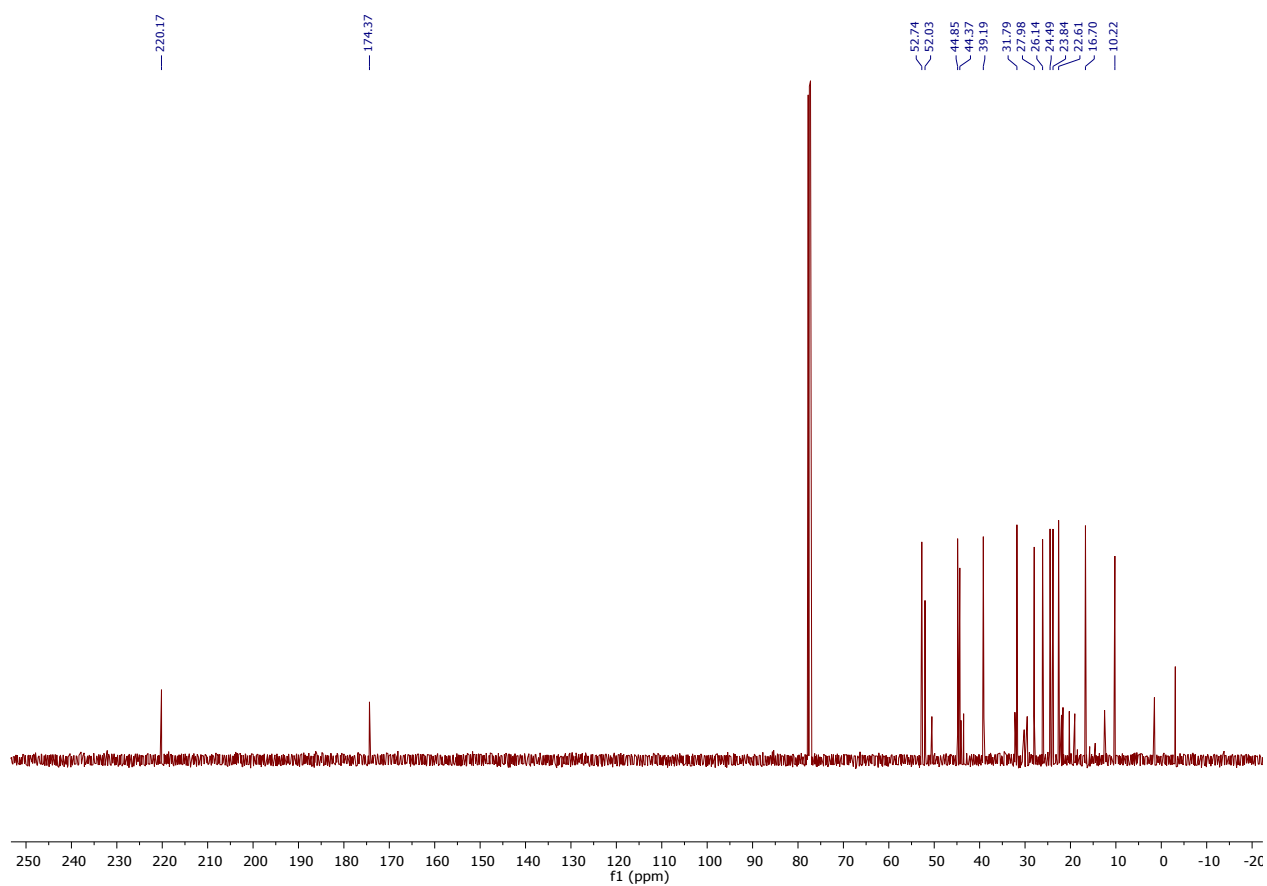

**<sup>1</sup>H NMR (500 MHz, CDCl<sub>3</sub>) and <sup>13</sup>C NMR (125 MHz, CDCl<sub>3</sub>) of **10****

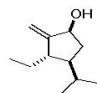

(1*S*,3*S*,4*S*)-3-ethyl-4-isopropyl-2-methylenecyclopentan-1-ol (**10**)

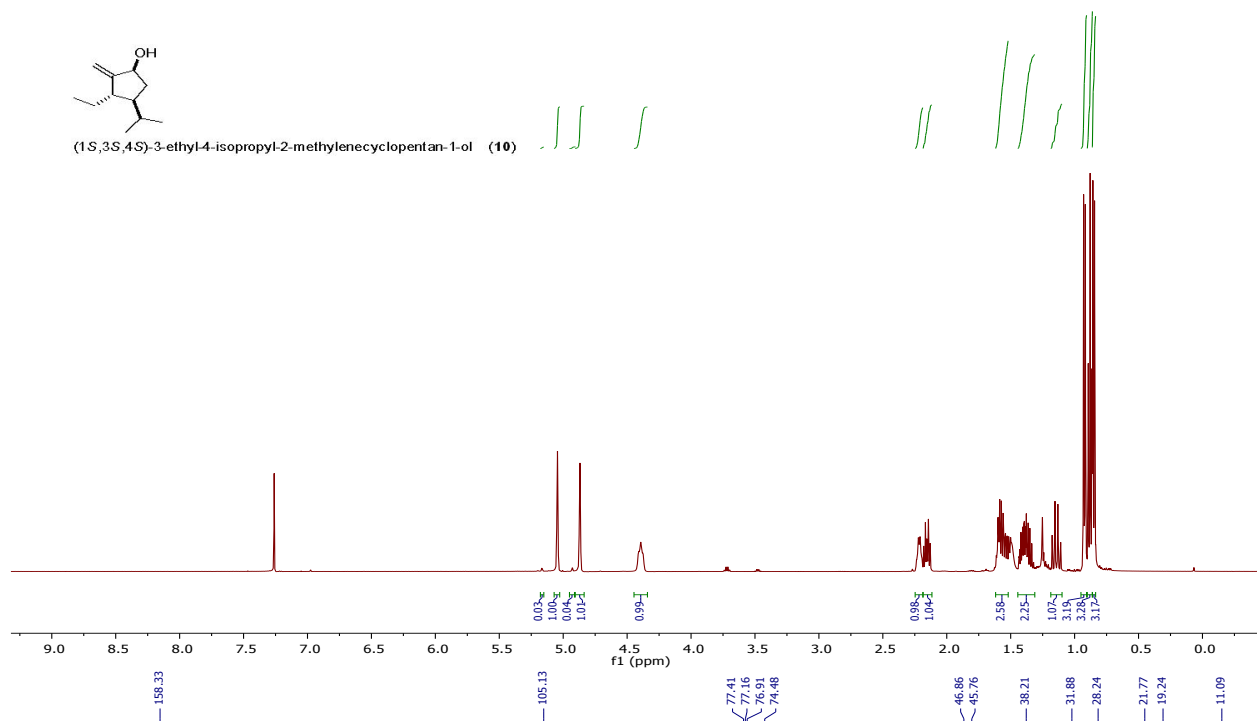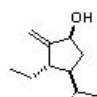

(1*S*,3*S*,4*S*)-3-ethyl-4-isopropyl-2-methylenecyclopentan-1-ol (**10**)

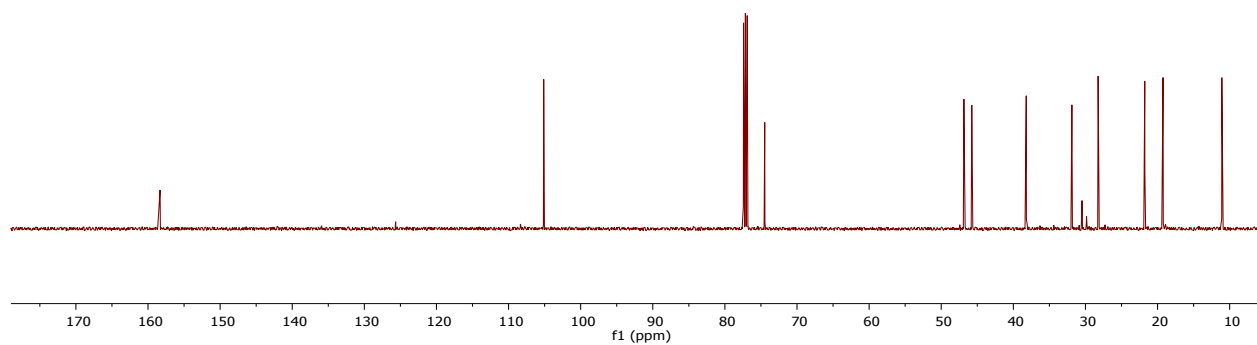

# H-H COSY of 10

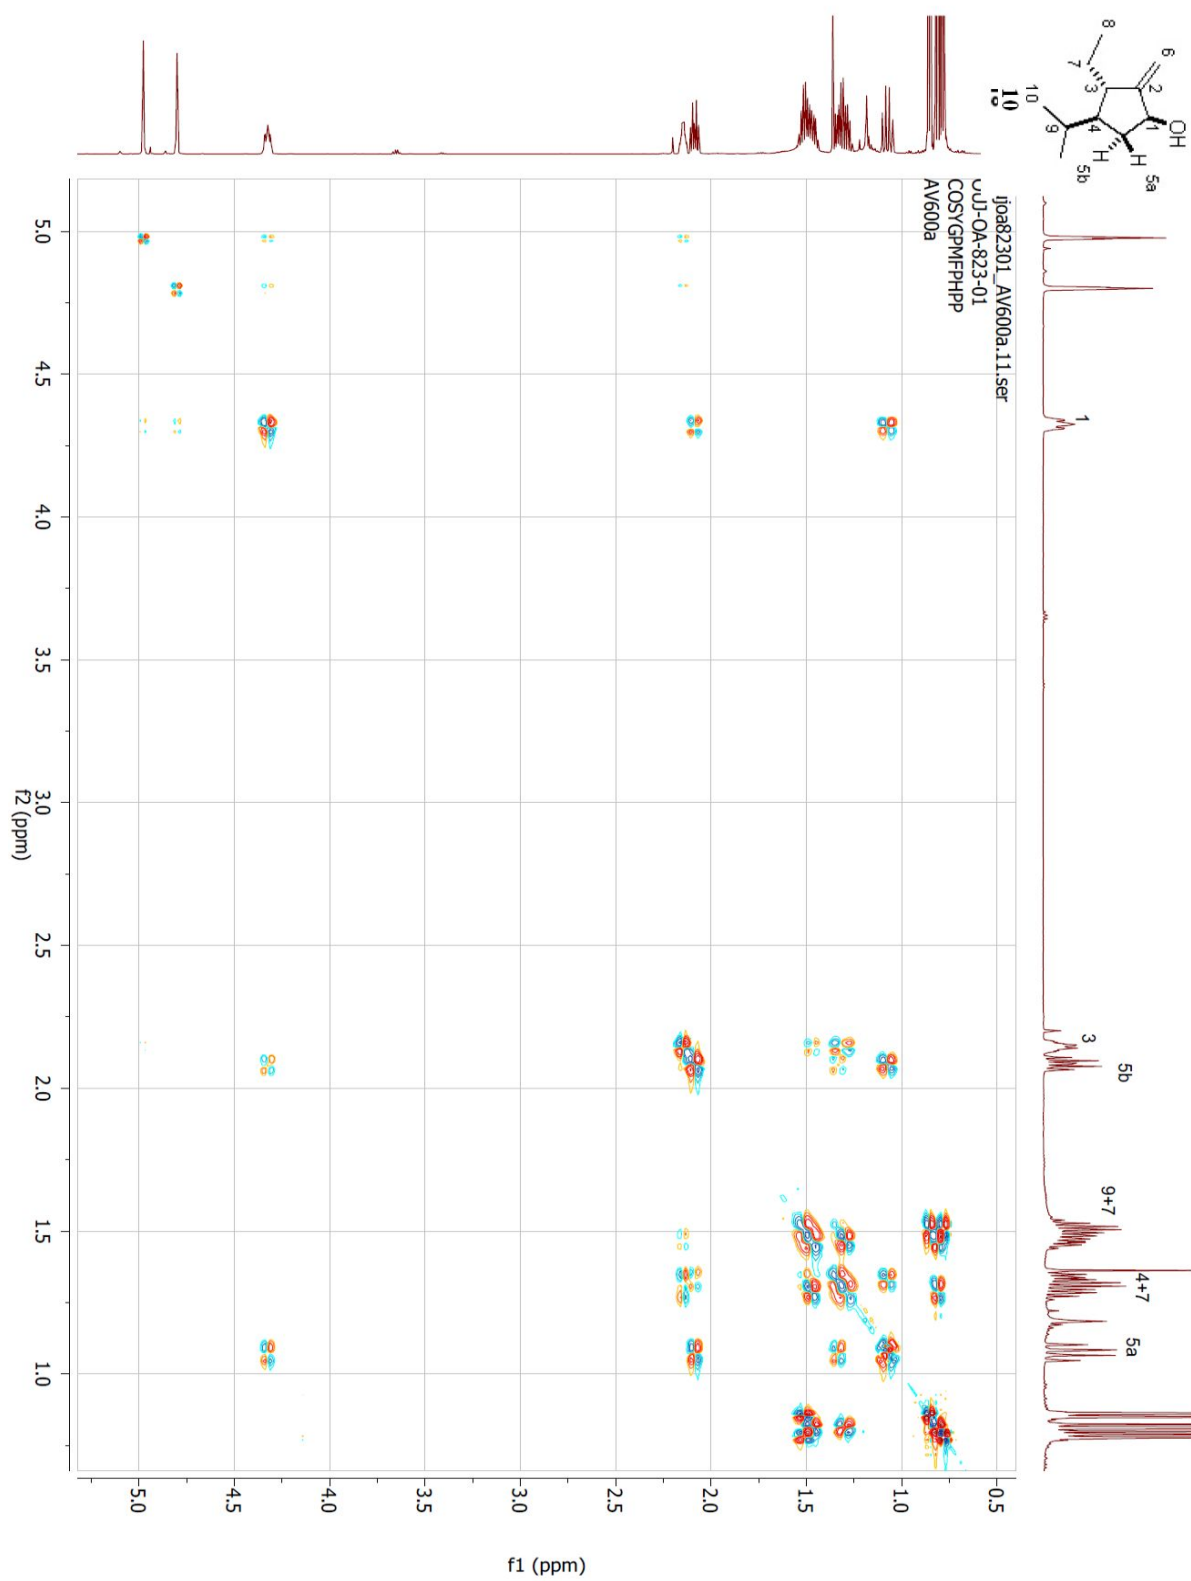

# NOE of 10

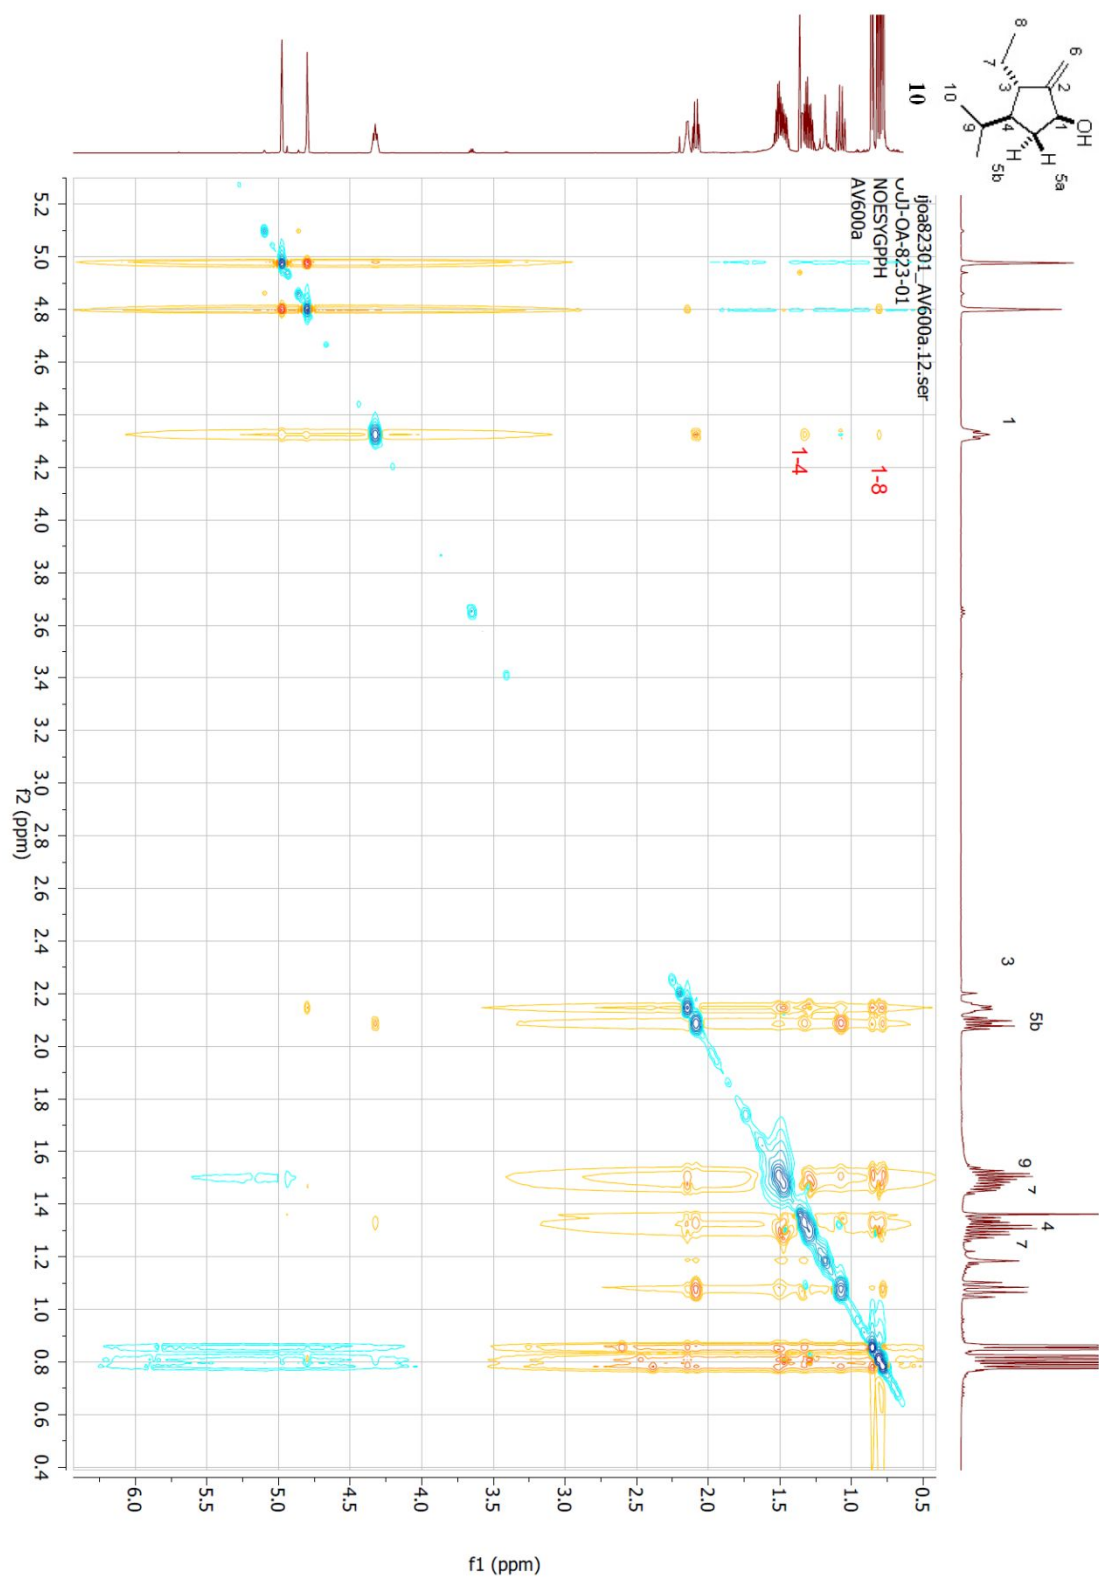



$^1\text{H}$  NMR (500 MHz,  $\text{CDCl}_3$ ) and  $^{13}\text{C}$  NMR (125 MHz,  $\text{CDCl}_3$ ) of **12**

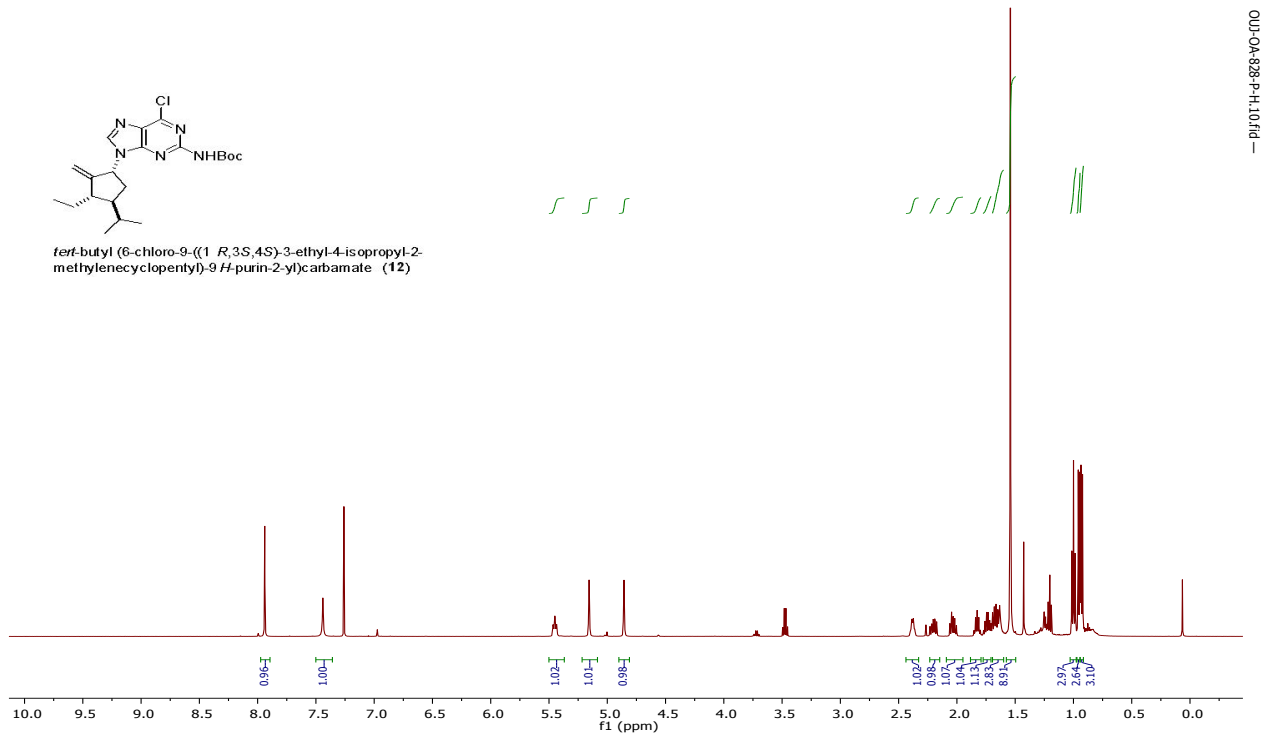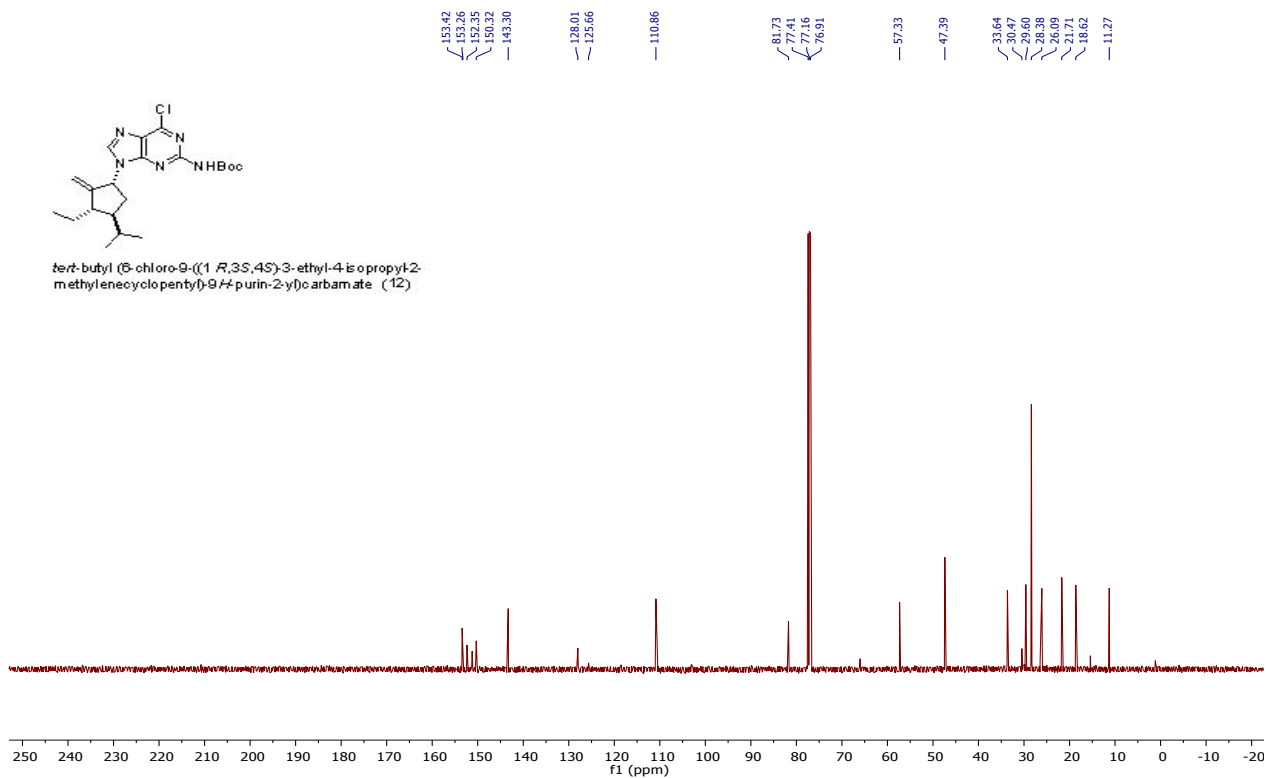

OU-04-829-P-H-10-00

## HPLC and GC Traces

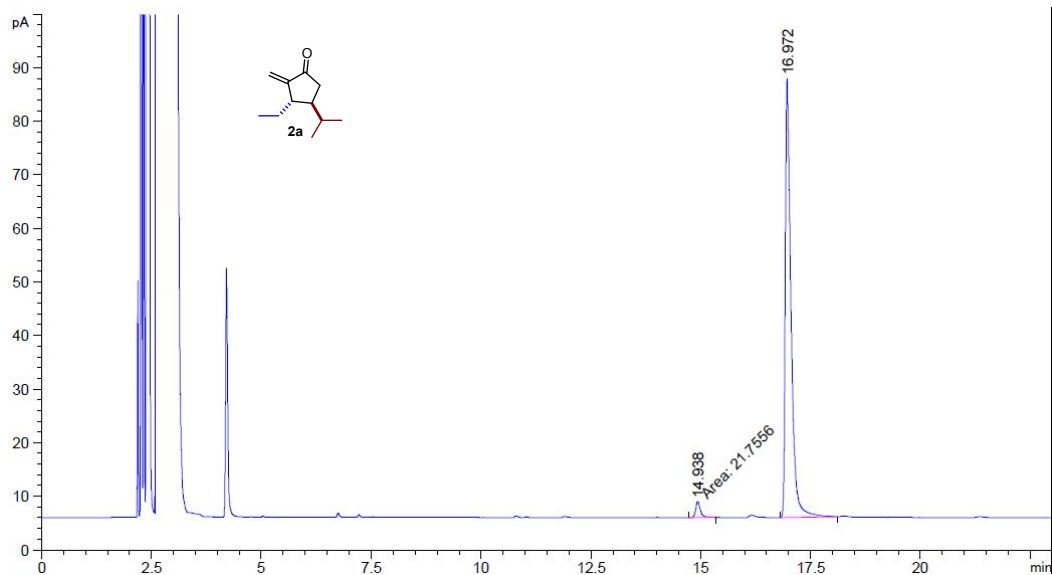

| Peak # | RetTime [min] | Type | Width [min] | Area [pA*s] | Height [pA] | Area %   |
|--------|---------------|------|-------------|-------------|-------------|----------|
| 1      | 14.938        | MM   | 0.1218      | 21.75561    | 2.97726     | 2.86123  |
| 2      | 16.972        | BB   | 0.1251      | 738.60394   | 81.97423    | 97.13877 |

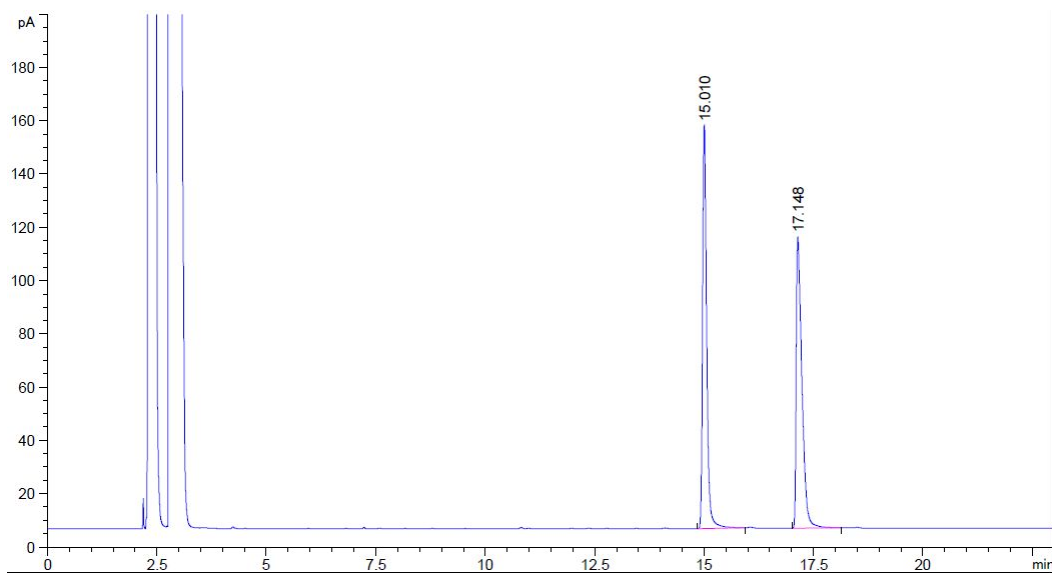

| Peak # | RetTime [min] | Type | Width [min] | Area [pA*s] | Height [pA] | Area %   |
|--------|---------------|------|-------------|-------------|-------------|----------|
| 1      | 15.010        | BB   | 0.0931      | 988.31958   | 151.60349   | 49.96575 |
| 2      | 17.148        | BB   | 0.1203      | 989.67438   | 109.61007   | 50.03425 |

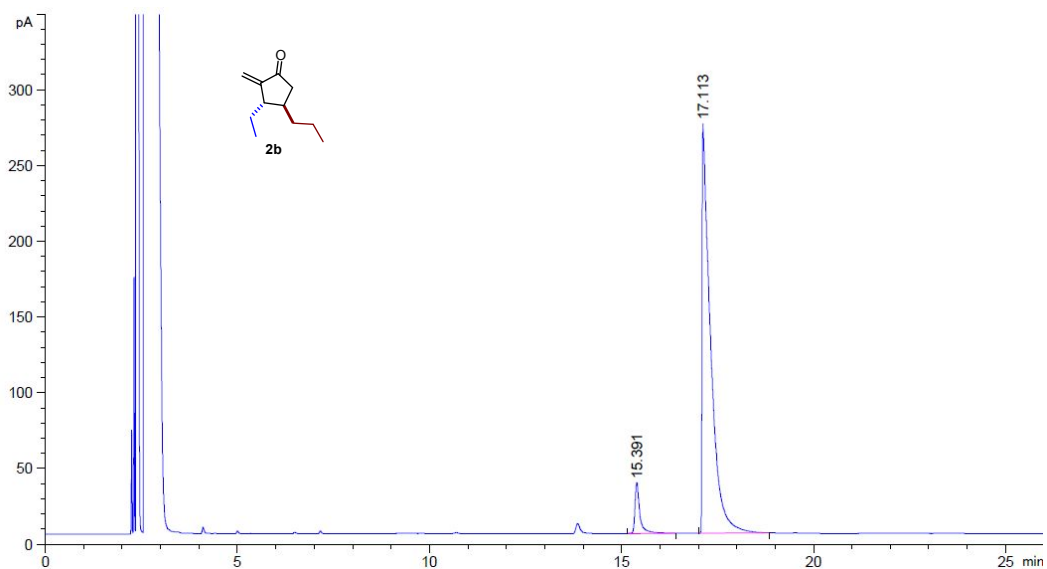

| Peak # | RetTime [min] | Type | Width [min] | Area [pA*s] | Height [pA] | Area %   |
|--------|---------------|------|-------------|-------------|-------------|----------|
| 1      | 15.391        | BB   | 0.1258      | 299.71332   | 33.69463    | 6.78301  |
| 2      | 17.113        | BB   | 0.1865      | 4118.87402  | 270.67563   | 93.21699 |

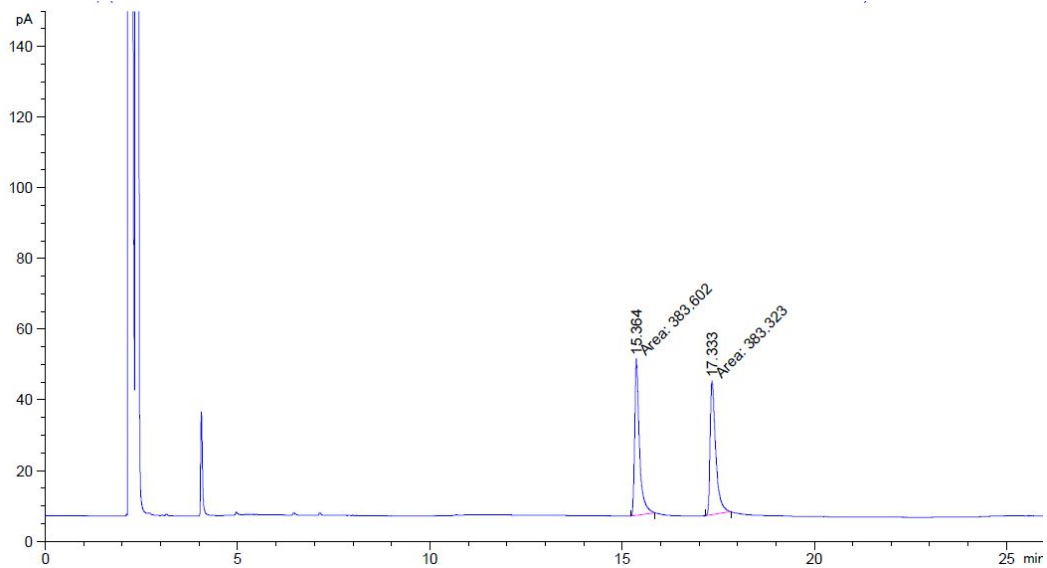

| Peak # | RetTime [min] | Type | Width [min] | Area [pA*s] | Height [pA] | Area %   |
|--------|---------------|------|-------------|-------------|-------------|----------|
| 1      | 15.364        | MM   | 0.1442      | 383.60187   | 44.33823    | 50.01818 |
| 2      | 17.333        | MM   | 0.1690      | 383.32297   | 37.79705    | 49.98182 |

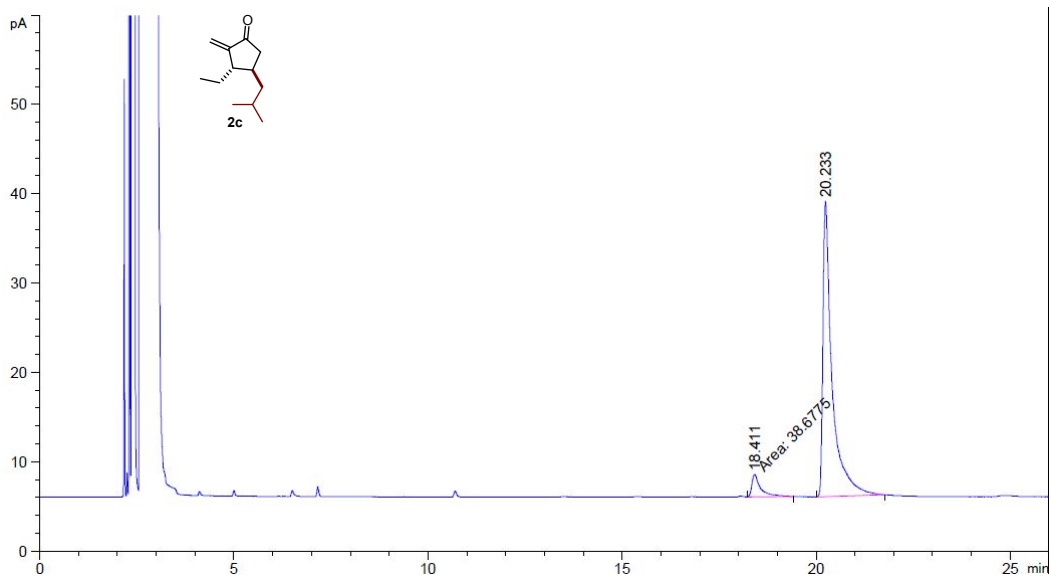

| Peak # | RetTime [min] | Type | Width [min] | Area [pA*s] | Height [pA] | Area %   |
|--------|---------------|------|-------------|-------------|-------------|----------|
| 1      | 18.411        | MM   | 0.2572      | 38.67746    | 2.50663     | 6.64012  |
| 2      | 20.233        | BB   | 0.2007      | 543.80408   | 33.09599    | 93.35988 |

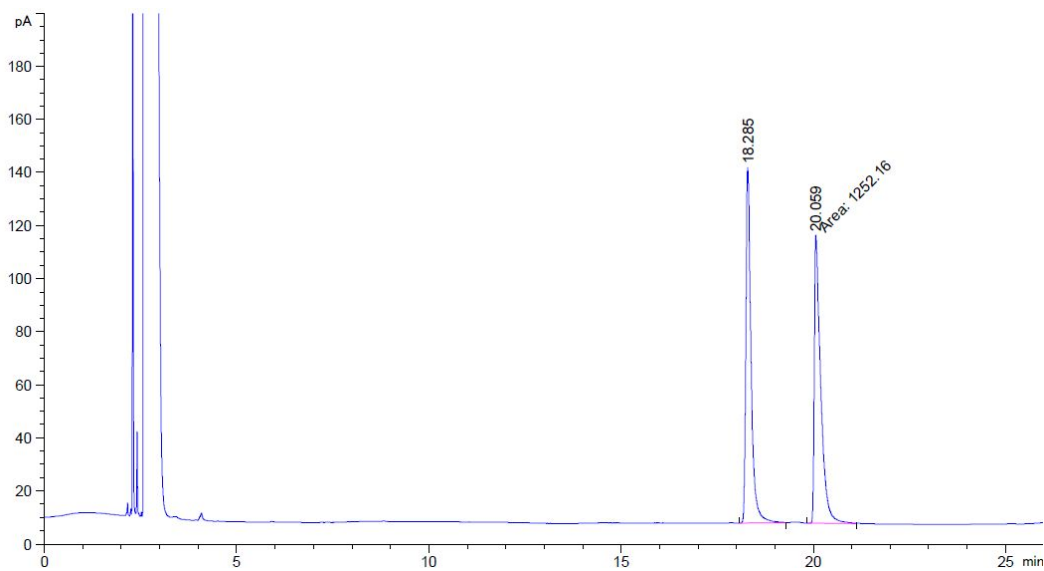

| Peak # | RetTime [min] | Type | Width [min] | Area [pA*s] | Height [pA] | Area %   |
|--------|---------------|------|-------------|-------------|-------------|----------|
| 1      | 18.285        | BB   | 0.1281      | 1252.32813  | 133.89185   | 50.00331 |
| 2      | 20.059        | MM   | 0.1923      | 1252.16248  | 108.53397   | 49.99669 |

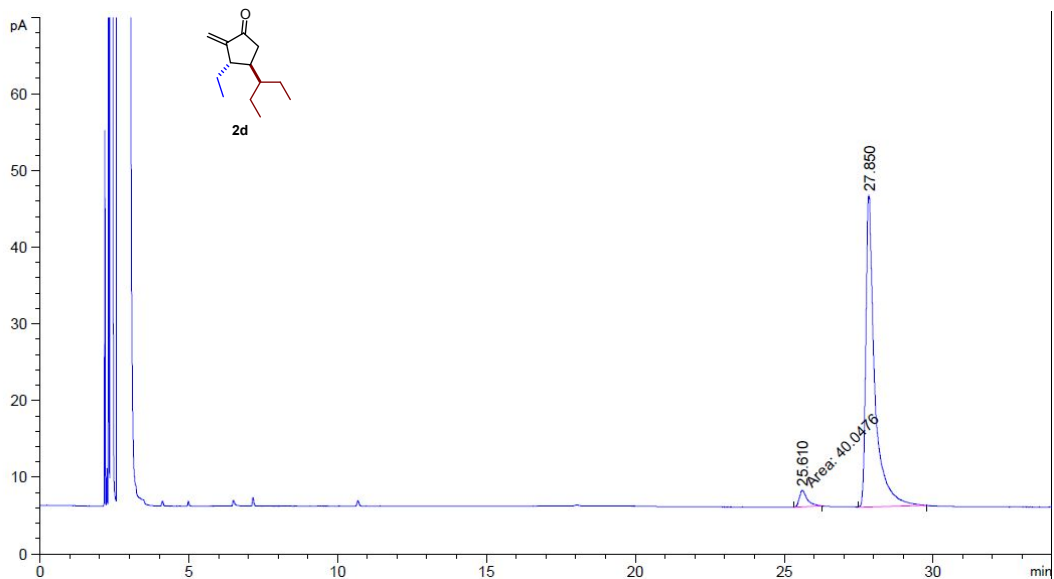

| Peak # | RetTime [min] | Type | Width [min] | Area [pA*s] | Height [pA] | Area %   |
|--------|---------------|------|-------------|-------------|-------------|----------|
| 1      | 25.610        | MM   | 0.3072      | 40.04757    | 2.17250     | 4.50807  |
| 2      | 27.850        | BB   | 0.2493      | 848.30621   | 40.67644    | 95.49193 |

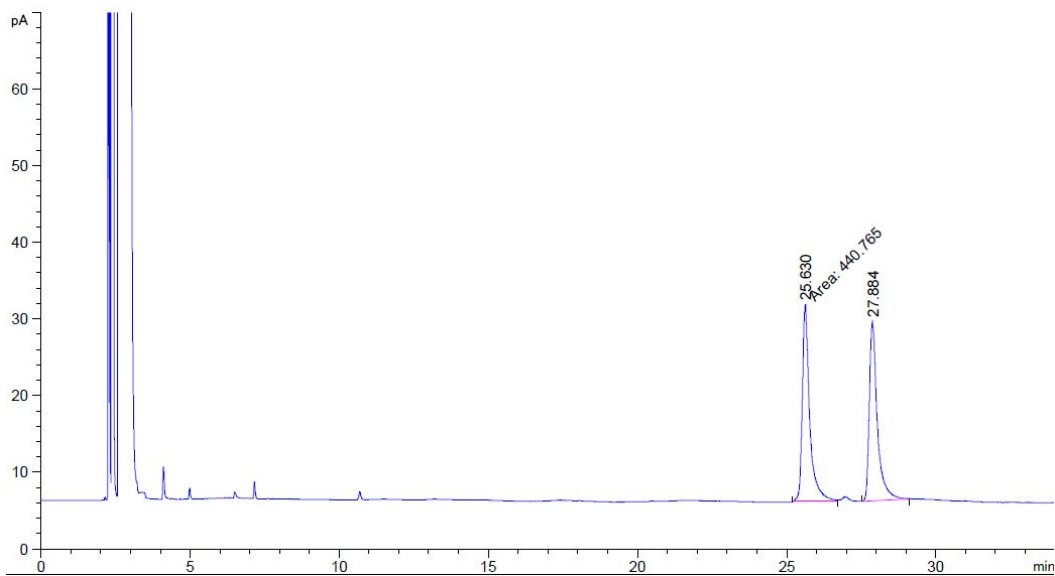

| Peak # | RetTime [min] | Type | Width [min] | Area [pA*s] | Height [pA] | Area %   |
|--------|---------------|------|-------------|-------------|-------------|----------|
| 1      | 25.630        | MM   | 0.2859      | 440.76489   | 25.69806    | 50.36864 |
| 2      | 27.884        | BB   | 0.2258      | 434.31311   | 23.48179    | 49.63136 |

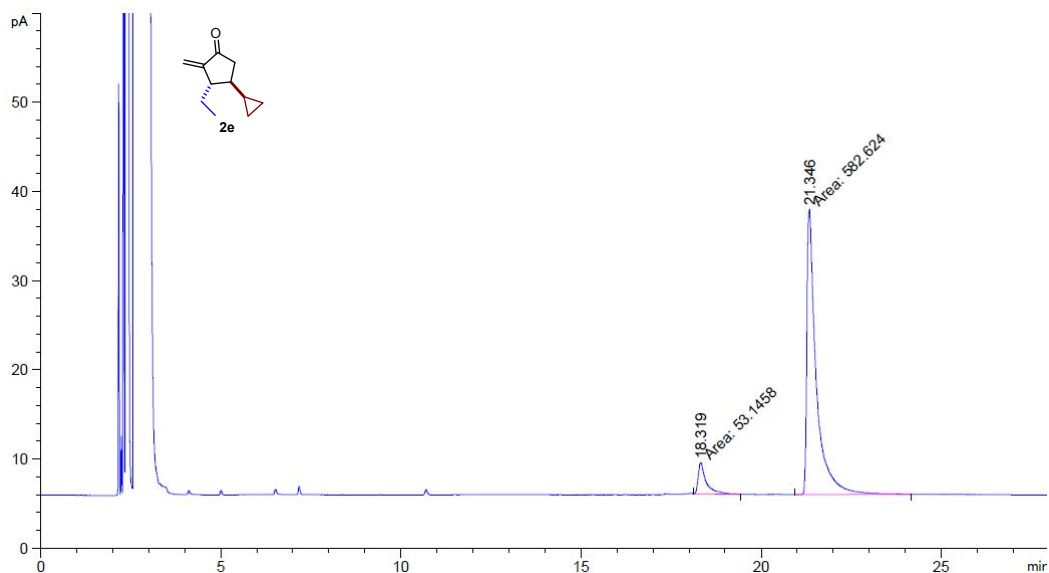

| Peak # | RetTime [min] | Type | Width [min] | Area [pA*s] | Height [pA] | Area %   |
|--------|---------------|------|-------------|-------------|-------------|----------|
| 1      | 18.319        | MM   | 0.2559      | 53.14576    | 3.46135     | 8.35928  |
| 2      | 21.346        | MM   | 0.3036      | 582.62354   | 31.98459    | 91.64072 |

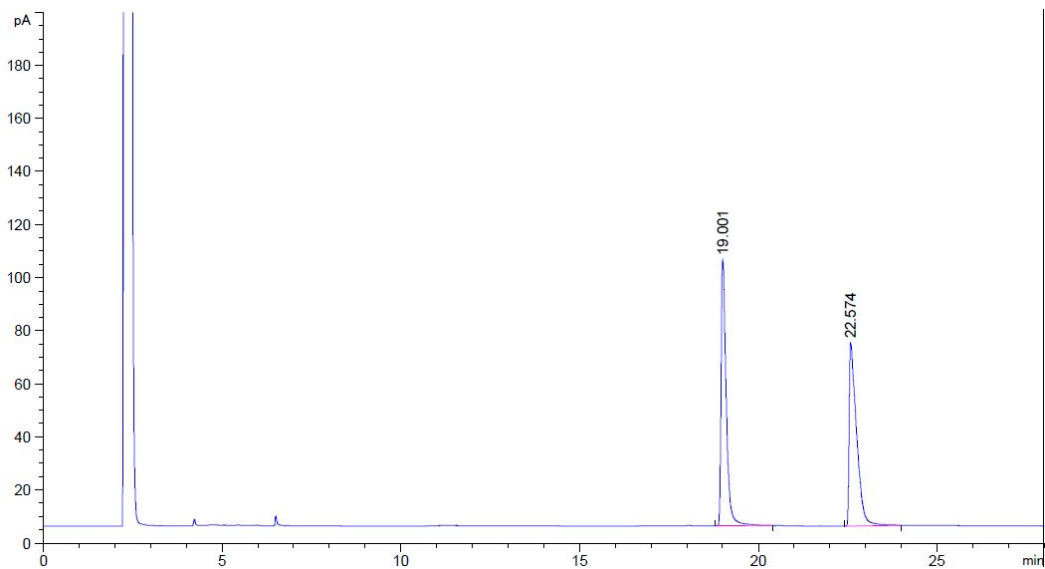

| Peak # | RetTime [min] | Type | Width [min] | Area [pA*s] | Height [pA] | Area %   |
|--------|---------------|------|-------------|-------------|-------------|----------|
| 1      | 19.001        | BB   | 0.1280      | 998.87085   | 100.42361   | 50.03397 |
| 2      | 22.574        | BB   | 0.1809      | 997.51465   | 69.30116    | 49.96603 |

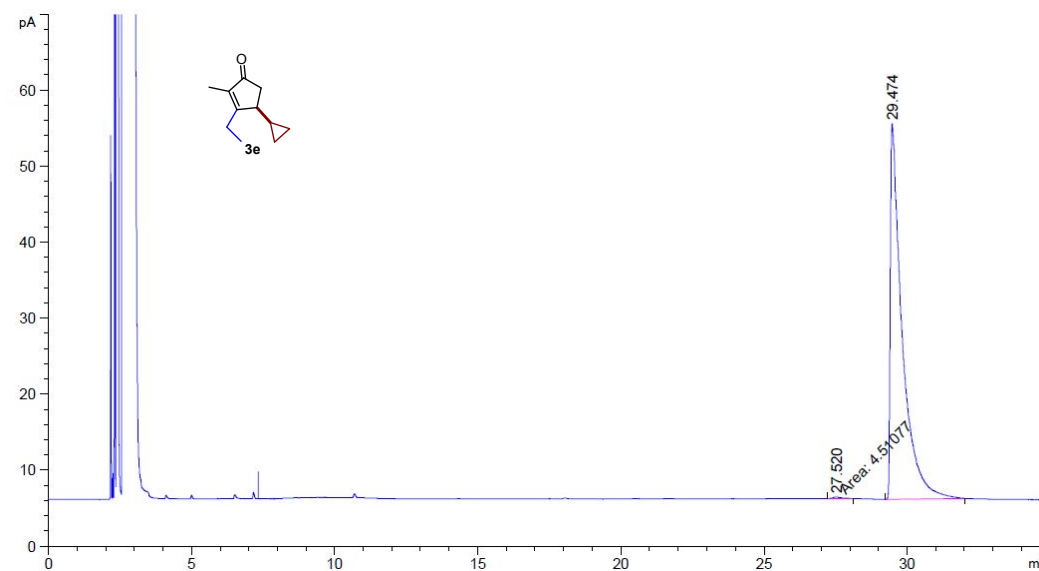

| Peak # | RetTime [min] | Type | Width [min] | Area [pA*s] | Height [pA] | Area %   |
|--------|---------------|------|-------------|-------------|-------------|----------|
| 1      | 27.520        | MM   | 0.3770      | 4.51077     | 1.99437e-1  | 0.31824  |
| 2      | 29.474        | BB   | 0.3424      | 1412.91113  | 49.44844    | 99.68176 |

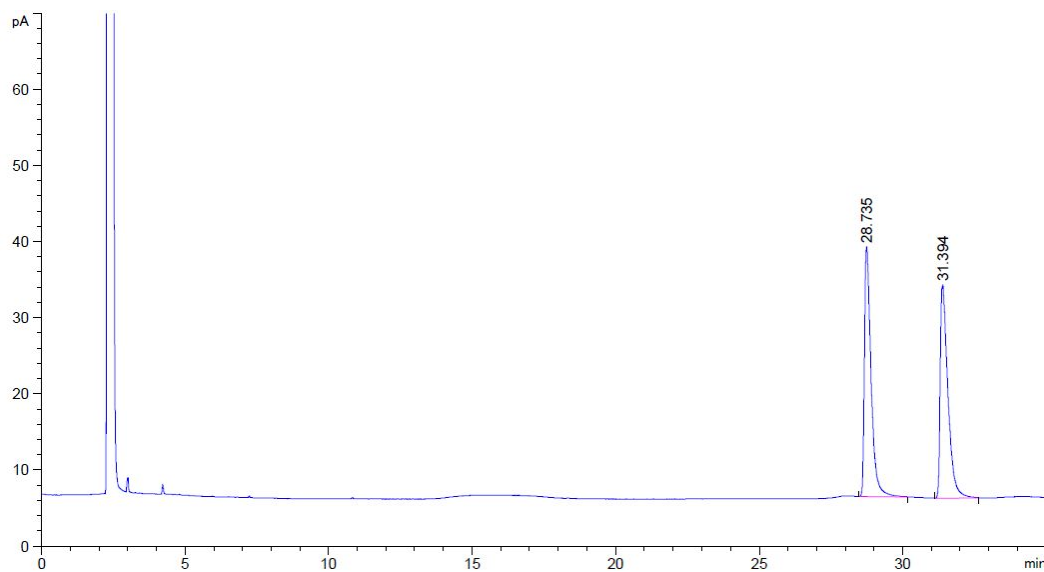

| Peak # | RetTime [min] | Type | Width [min] | Area [pA*s] | Height [pA] | Area %   |
|--------|---------------|------|-------------|-------------|-------------|----------|
| 1      | 28.735        | BB   | 0.1918      | 527.47125   | 32.76172    | 50.21322 |
| 2      | 31.394        | BB   | 0.2279      | 522.99170   | 27.99739    | 49.78678 |

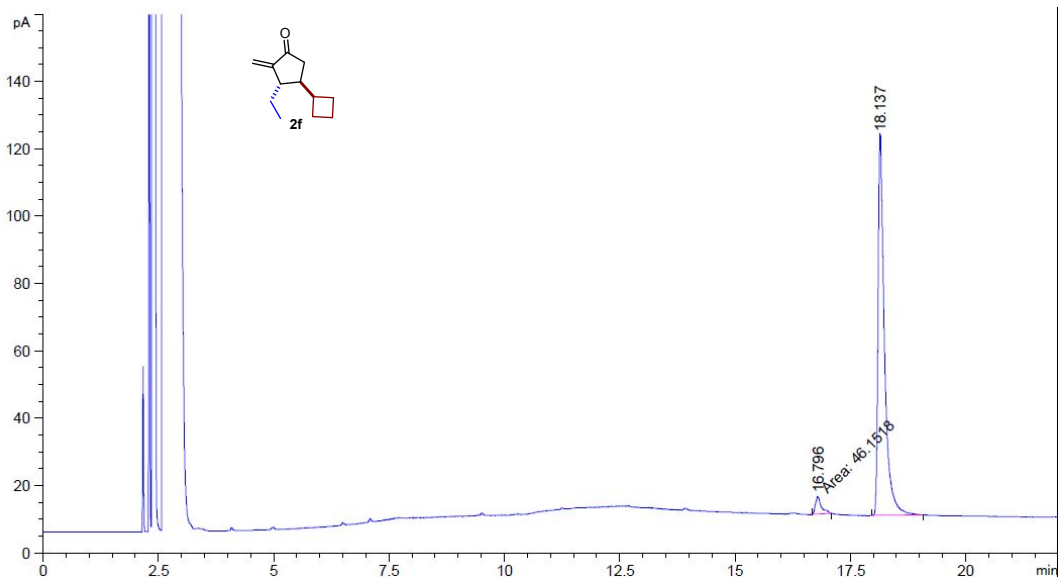

| Peak # | RetTime [min] | Type | Width [min] | Area [pA*s] | Height [pA] | Area %   |
|--------|---------------|------|-------------|-------------|-------------|----------|
| 1      | 16.796        | MM   | 0.1482      | 46.15181    | 5.18965     | 4.06006  |
| 2      | 18.137        | BB   | 0.1307      | 1090.57629  | 112.85995   | 95.93994 |

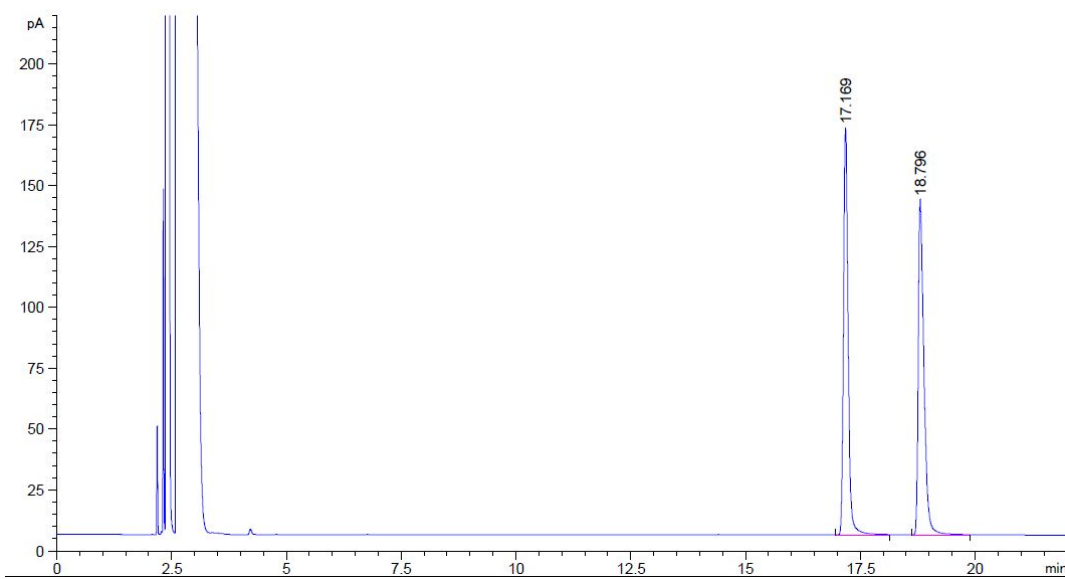

| Peak # | RetTime [min] | Type | Width [min] | Area [pA*s] | Height [pA] | Area %   |
|--------|---------------|------|-------------|-------------|-------------|----------|
| 1      | 17.169        | BB   | 0.1078      | 1172.30774  | 167.19647   | 49.93501 |
| 2      | 18.796        | BB   | 0.1116      | 1175.35925  | 137.72757   | 50.06499 |



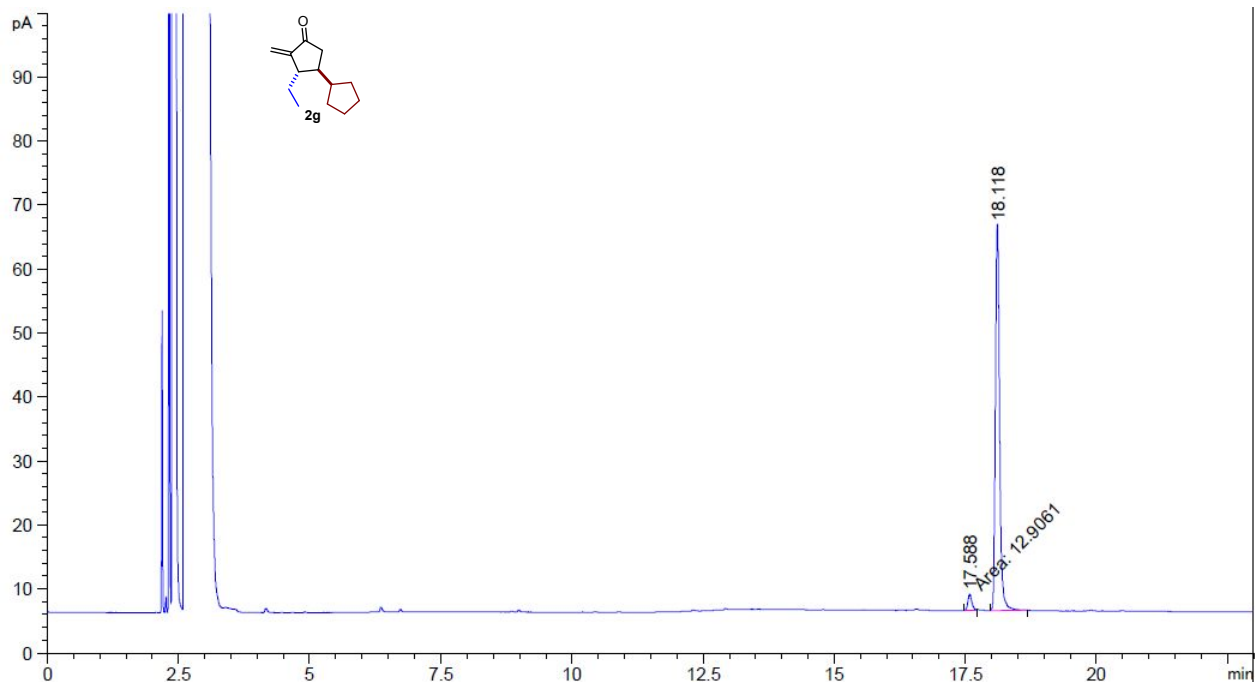

| Peak # | RetTime [min] | Type | Width [min] | Area [pA*s] | Height [pA] | Area %   |
|--------|---------------|------|-------------|-------------|-------------|----------|
| 1      | 17.588        | MM   | 0.0859      | 12.90606    | 2.50445     | 3.69280  |
| 2      | 18.118        | BB   | 0.0842      | 336.58618   | 60.19957    | 96.30720 |

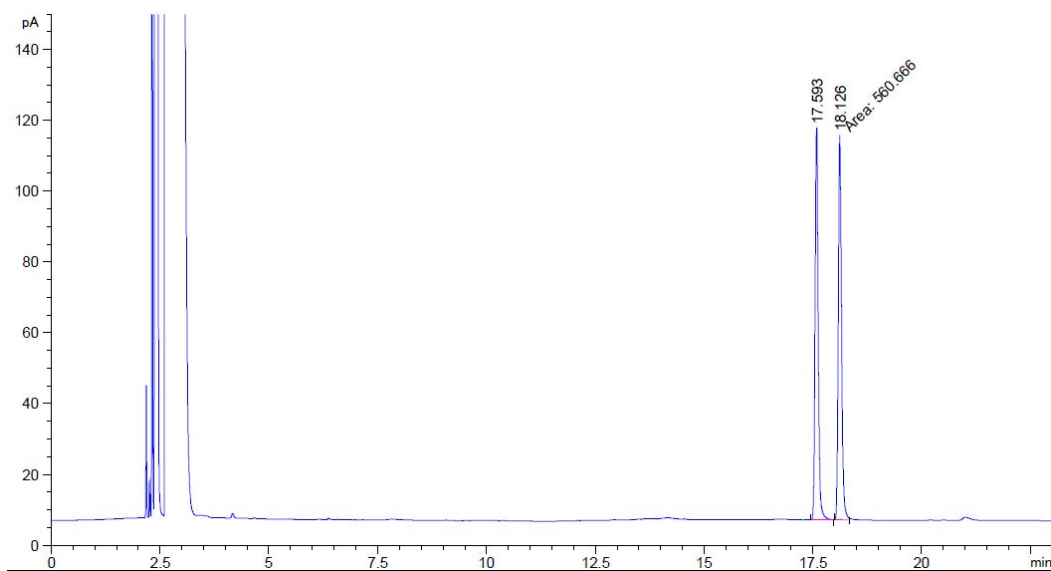

| Peak # | RetTime [min] | Type | Width [min] | Area [pA*s] | Height [pA] | Area %   |
|--------|---------------|------|-------------|-------------|-------------|----------|
| 1      | 17.593        | BB   | 0.0755      | 555.85999   | 110.87234   | 49.78477 |
| 2      | 18.126        | MF   | 0.0859      | 560.66620   | 108.73307   | 50.21523 |

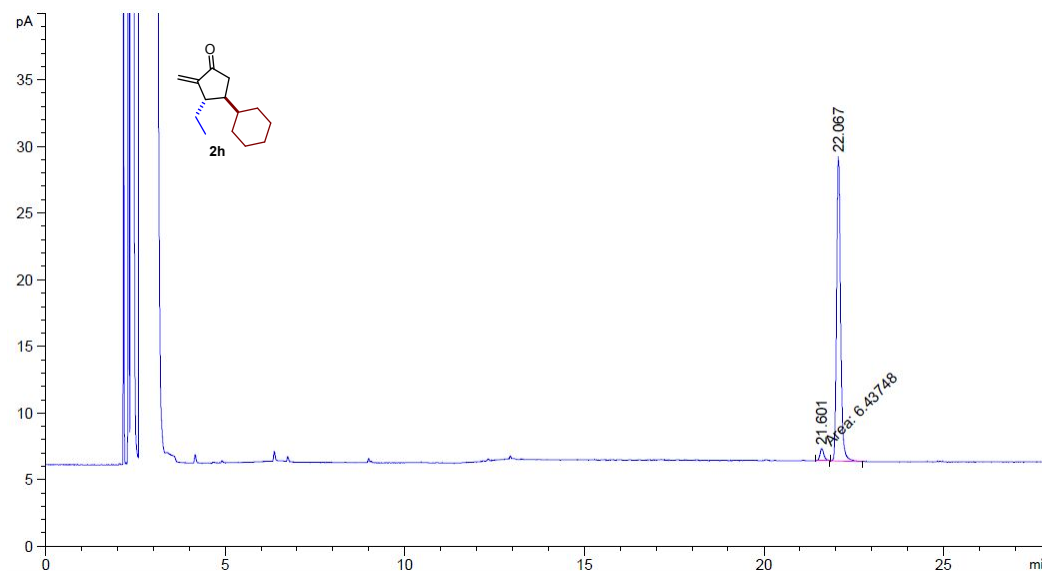

| Peak # | RetTime [min] | Type | Width [min] | Area [pA*s] | Height [pA] | Area %   |
|--------|---------------|------|-------------|-------------|-------------|----------|
| 1      | 21.601        | MM   | 0.1230      | 6.43748     | 8.71994e-1  | 3.51846  |
| 2      | 22.067        | BB   | 0.1033      | 176.52524   | 22.81151    | 96.48154 |

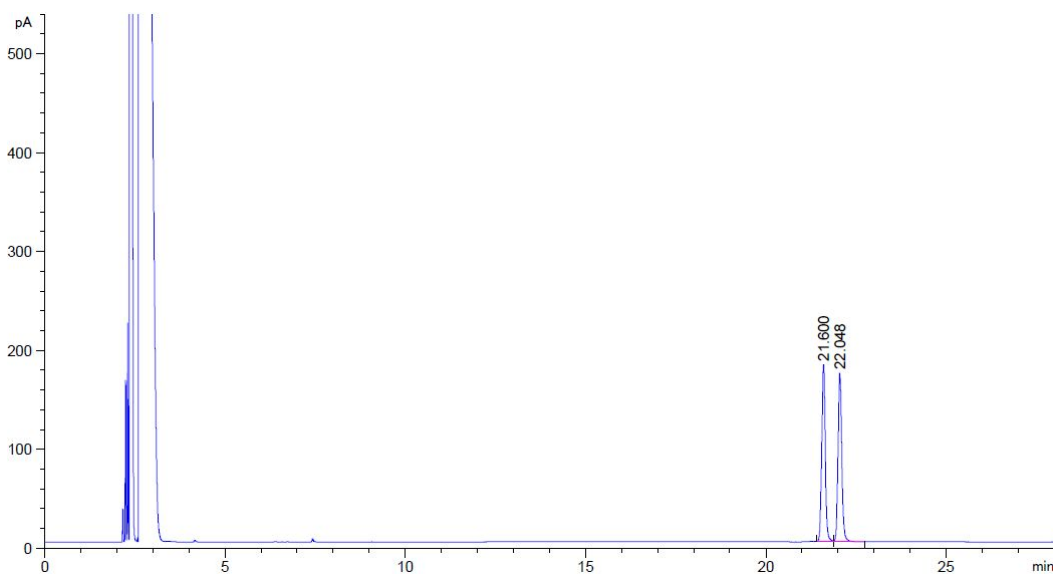

| Peak # | RetTime [min] | Type | Width [min] | Area [pA*s] | Height [pA] | Area %   |
|--------|---------------|------|-------------|-------------|-------------|----------|
| 1      | 21.600        | BV   | 0.0990      | 1221.09631  | 178.15886   | 49.67081 |
| 2      | 22.048        | VB   | 0.1049      | 1237.28174  | 169.92409   | 50.32919 |

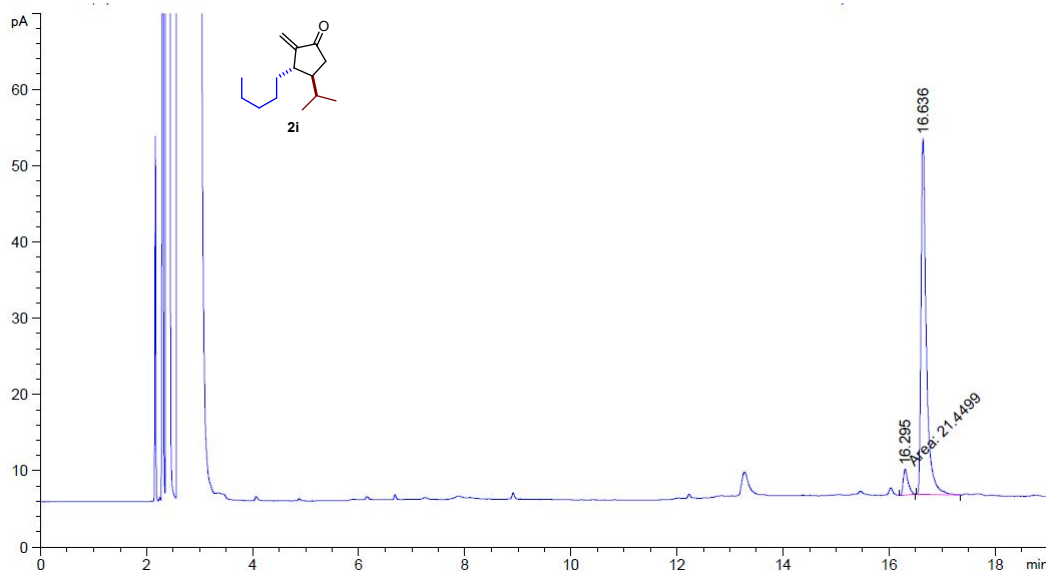

| Peak # | RetTime [min] | Type | Width [min] | Area [pA*s] | Height [pA] | Area %   |
|--------|---------------|------|-------------|-------------|-------------|----------|
| 1      | 16.295        | MM   | 0.1046      | 21.44985    | 3.41878     | 6.24202  |
| 2      | 16.636        | BB   | 0.0943      | 322.18643   | 46.80595    | 93.75798 |

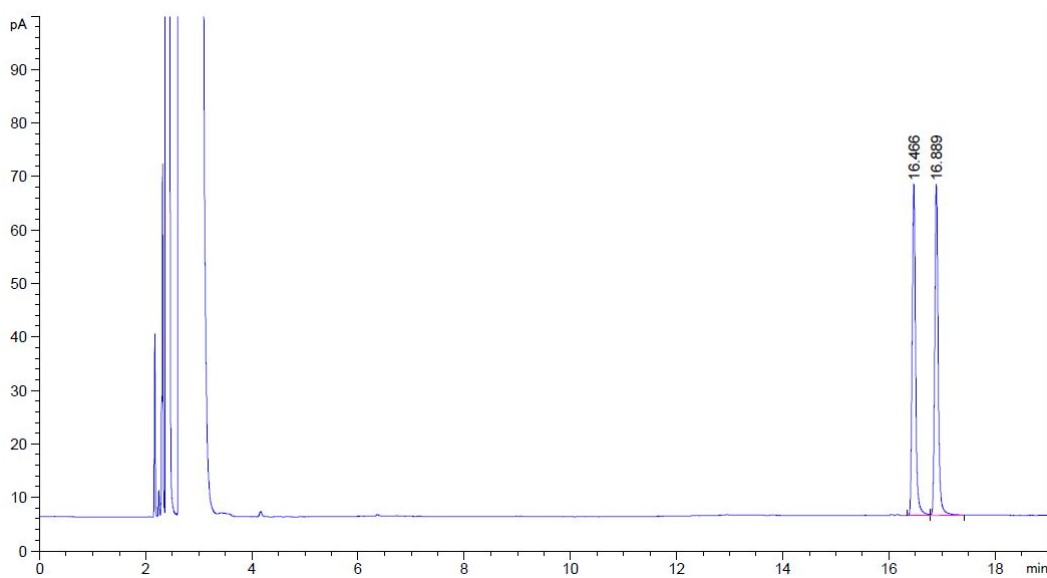

| Peak # | RetTime [min] | Type | Width [min] | Area [pA*s] | Height [pA] | Area %   |
|--------|---------------|------|-------------|-------------|-------------|----------|
| 1      | 16.466        | BV   | 0.0693      | 277.65585   | 61.96900    | 49.80191 |
| 2      | 16.889        | VB   | 0.0678      | 279.86459   | 61.80460    | 50.19809 |

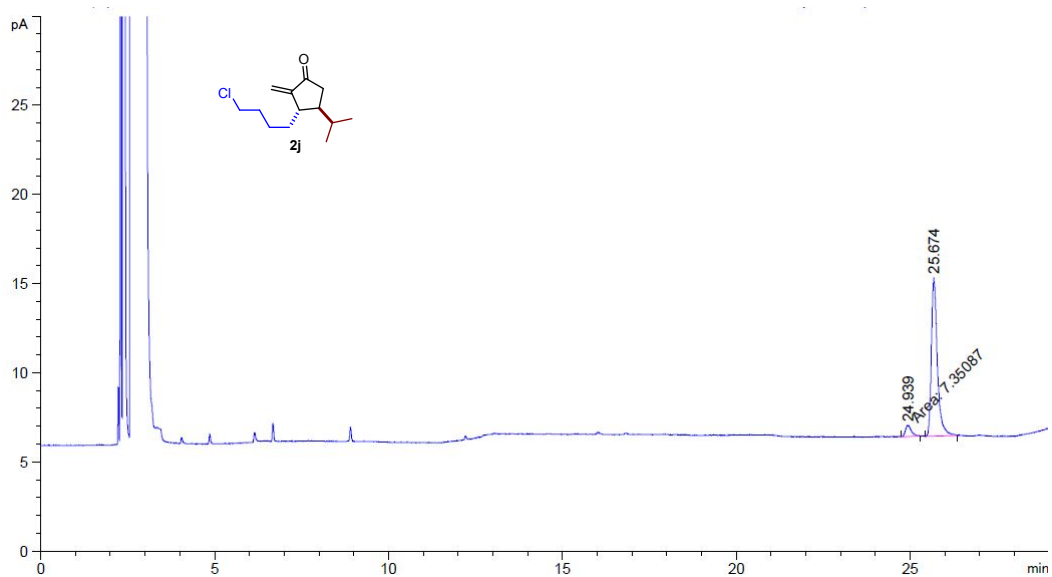

| Peak # | RetTime [min] | Type | Width [min] | Area [pA*s] | Height [pA] | Area %   |
|--------|---------------|------|-------------|-------------|-------------|----------|
| 1      | 24.939        | MM   | 0.1944      | 7.35087     | 6.30127e-1  | 6.49196  |
| 2      | 25.674        | BB   | 0.1551      | 105.87947   | 8.87846     | 93.50804 |

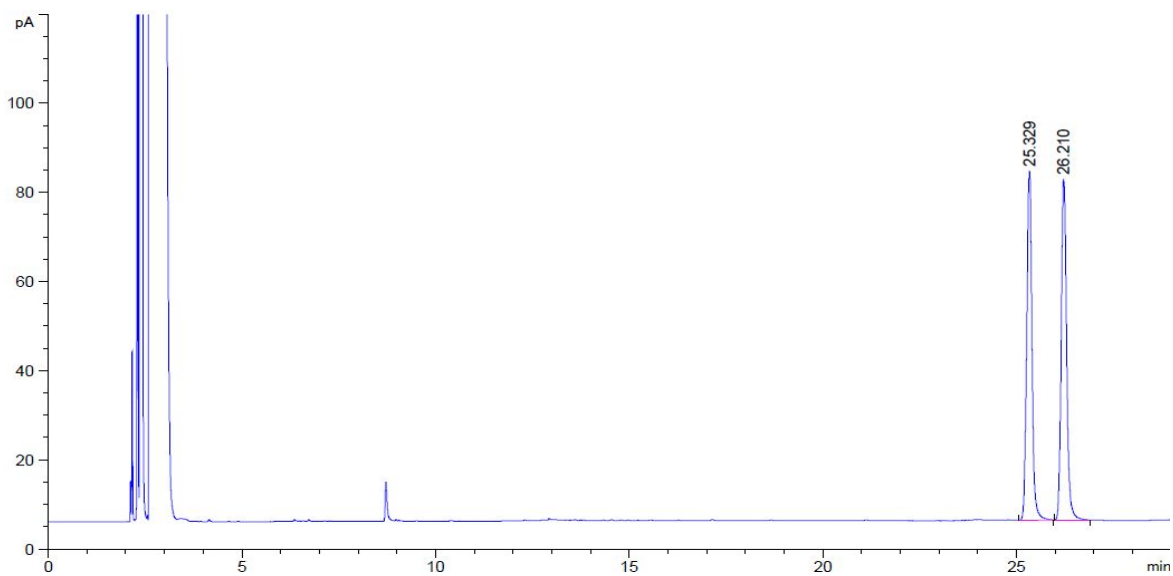

| Peak # | RetTime [min] | Type | Width [min] | Area [pA*s] | Height [pA] | Area %   |
|--------|---------------|------|-------------|-------------|-------------|----------|
| 1      | 25.329        | BB   | 0.1142      | 741.61896   | 78.51183    | 50.01438 |
| 2      | 26.210        | BB   | 0.1209      | 741.19244   | 76.59077    | 49.98562 |

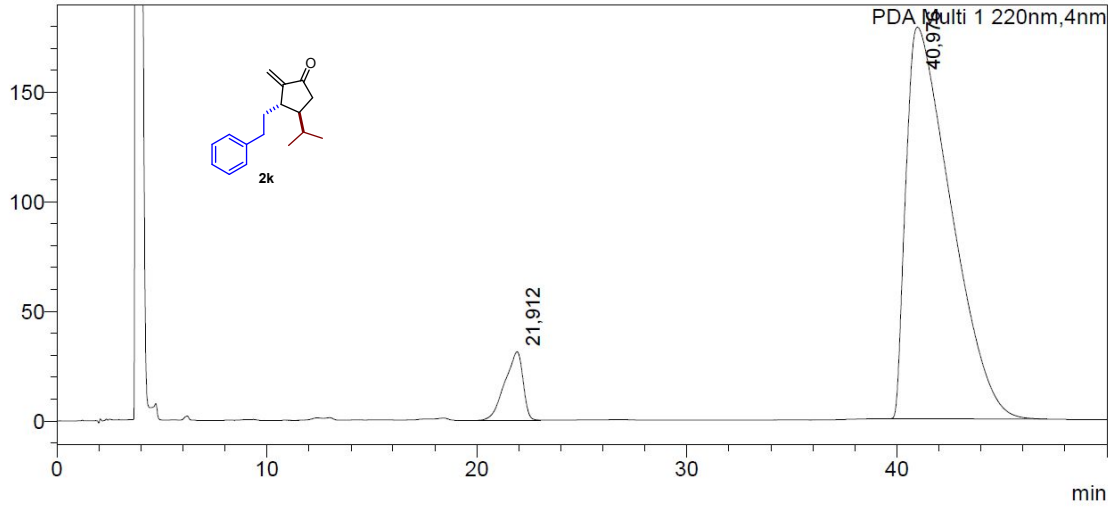

**<Peak Table>**

PDA Ch1 220nm

| Peak# | Ret. Time | Area%   | Area     | Height |
|-------|-----------|---------|----------|--------|
| 1     | 21,912    | 6,566   | 1868415  | 31213  |
| 2     | 40,976    | 93,434  | 26585879 | 178743 |
| Total |           | 100,000 | 28454294 | 209955 |

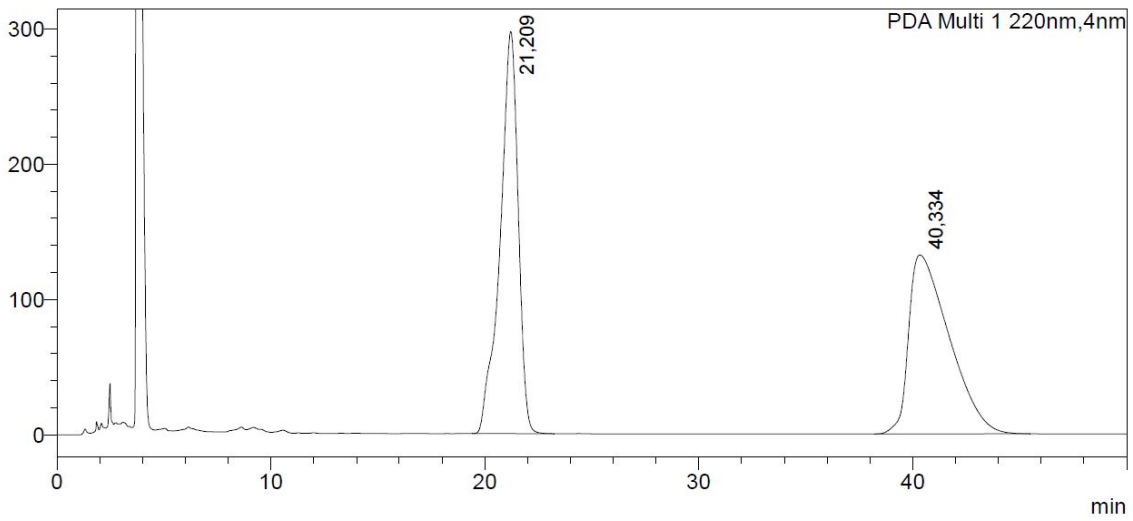

**<Peak Table>**

PDA Ch1 220nm

| Peak# | Ret. Time | Area%   | Area     | Height |
|-------|-----------|---------|----------|--------|
| 1     | 21,209    | 50,088  | 17511313 | 297218 |
| 2     | 40,334    | 49,912  | 132362   |        |
| Total |           | 100,000 | 34961176 | 429580 |

### <Chromatogram>

mAU

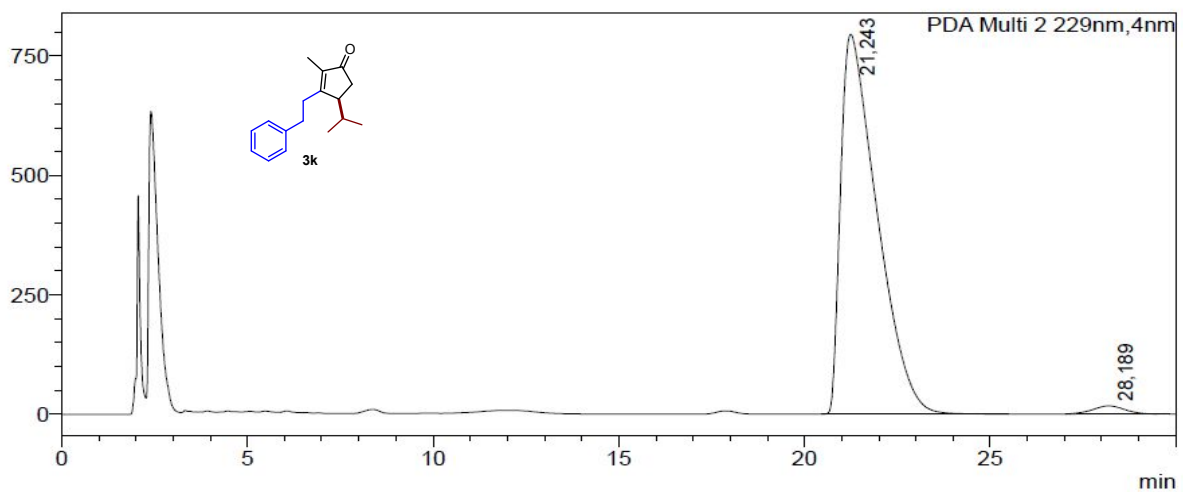

### <Peak Table>

PDA Ch2 229nm

| Peak# | Ret. Time | Area%   | Area     | Height |
|-------|-----------|---------|----------|--------|
| 1     | 21,243    | 98,234  | 54117165 | 795109 |
| 2     | 28,189    | 1,766   | 973114   | 16672  |
| Total |           | 100,000 | 55090279 | 811781 |

mAU

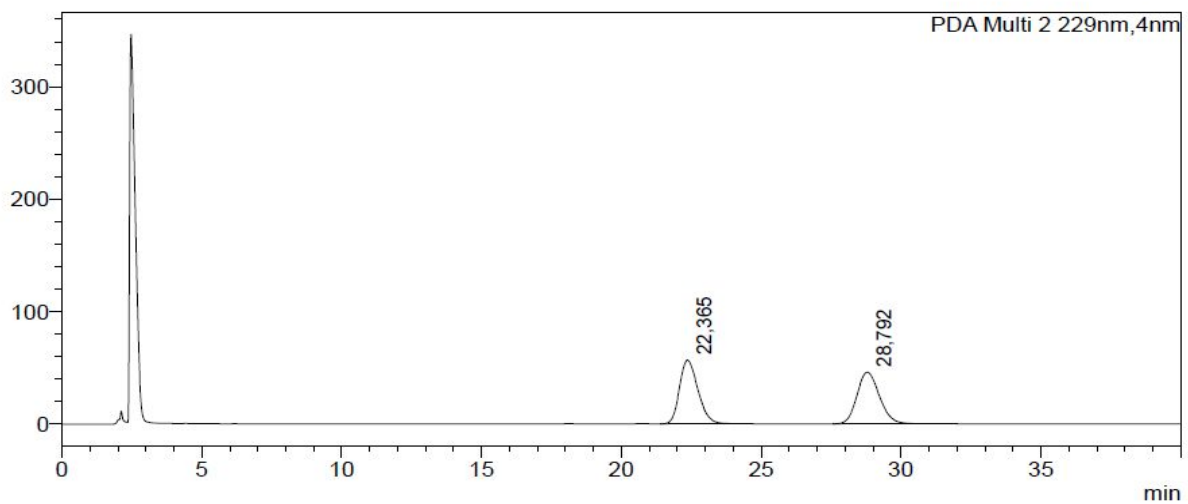

### <Peak Table>

PDA Ch2 229nm

| Peak# | Ret. Time | Area%   | Area    | Height |
|-------|-----------|---------|---------|--------|
| 1     | 22,365    | 50,373  | 2565962 | 56478  |
| 2     | 28,792    | 49,627  | 2528008 | 45799  |
| Total |           | 100,000 | 5093971 | 102277 |

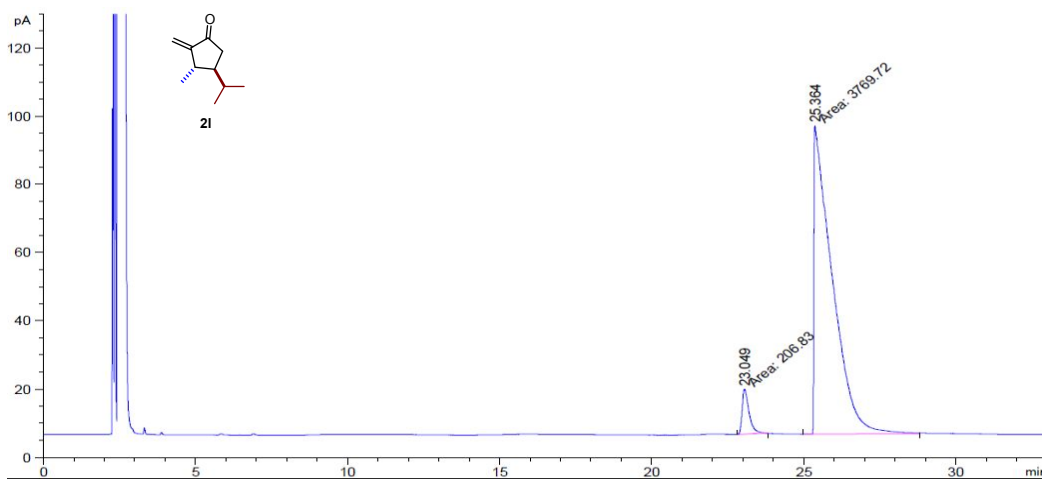

| Peak # | RetTime [min] | Type | Width [min] | Area [pA*s] | Height [pA] | Area %   |
|--------|---------------|------|-------------|-------------|-------------|----------|
| 1      | 23.049        | MM   | 0.2622      | 206.82990   | 13.14680    | 5.20124  |
| 2      | 25.364        | MM   | 0.6941      | 3769.71973  | 90.52276    | 94.79876 |

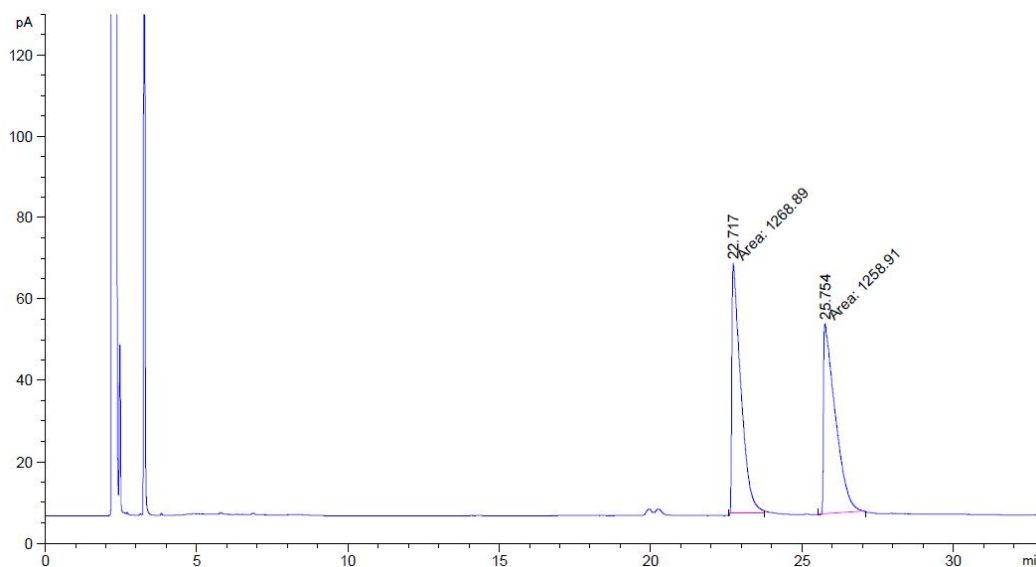

| Peak # | RetTime [min] | Type | Width [min] | Area [pA*s] | Height [pA] | Area %   |
|--------|---------------|------|-------------|-------------|-------------|----------|
| 1      | 22.717        | MM   | 0.3442      | 1268.89136  | 61.44370    | 50.19740 |
| 2      | 25.754        | MM   | 0.4495      | 1258.91138  | 46.68020    | 49.80260 |

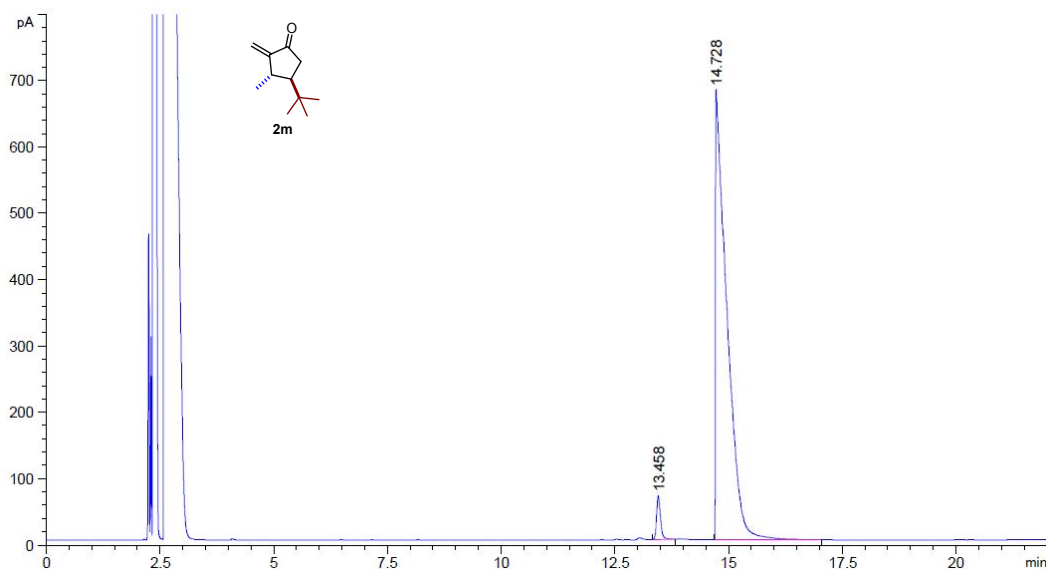

| Peak # | RetTime [min] | Type | Width [min] | Area [pA*s] | Height [pA] | Area %   |
|--------|---------------|------|-------------|-------------|-------------|----------|
| 1      | 13.458        | BB   | 0.0878      | 395.29996   | 66.06901    | 3.26760  |
| 2      | 14.728        | BB   | 0.2072      | 1.17023e4   | 678.49976   | 96.73240 |

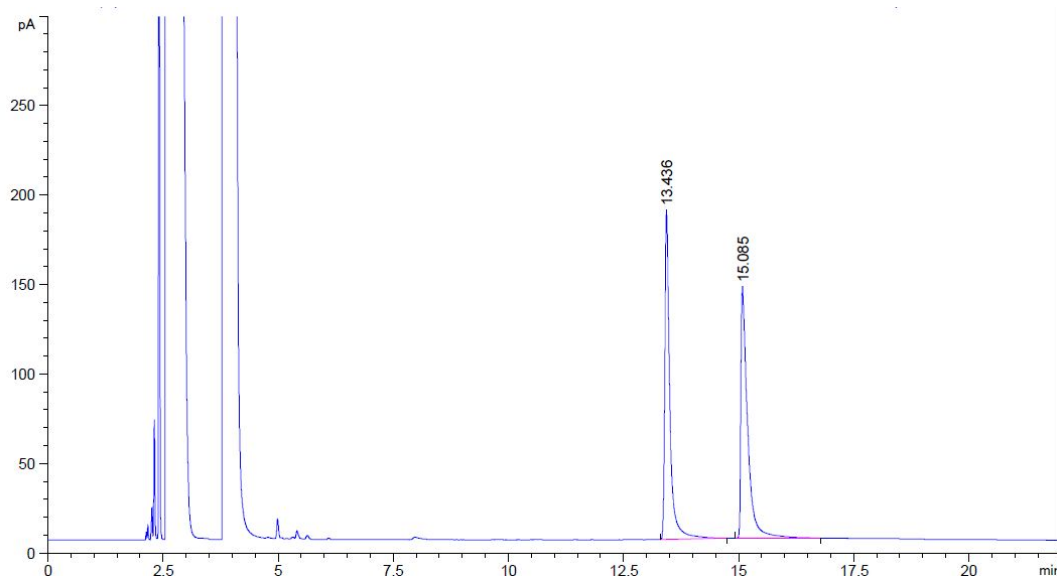

| Peak # | RetTime [min] | Type | Width [min] | Area [pA*s] | Height [pA] | Area %   |
|--------|---------------|------|-------------|-------------|-------------|----------|
| 1      | 13.436        | BB   | 0.1097      | 1401.58276  | 184.29607   | 49.43769 |
| 2      | 15.085        | BB   | 0.1328      | 1433.46655  | 140.75502   | 50.56231 |



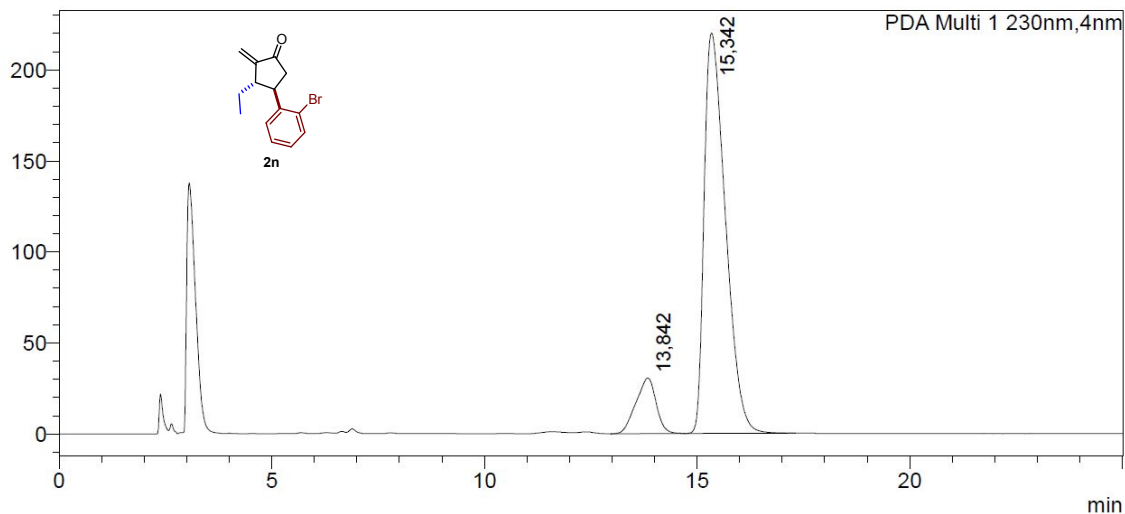

**<Peak Table>**

PDA Ch1 230nm

| Peak# | Ret. Time | Area    | Area%   | Height |
|-------|-----------|---------|---------|--------|
| 1     | 13,842    | 1005480 | 11,614  | 30537  |
| 2     | 15,342    | 7651714 | 88,386  | 219940 |
| Total |           | 8657195 | 100,000 | 250477 |

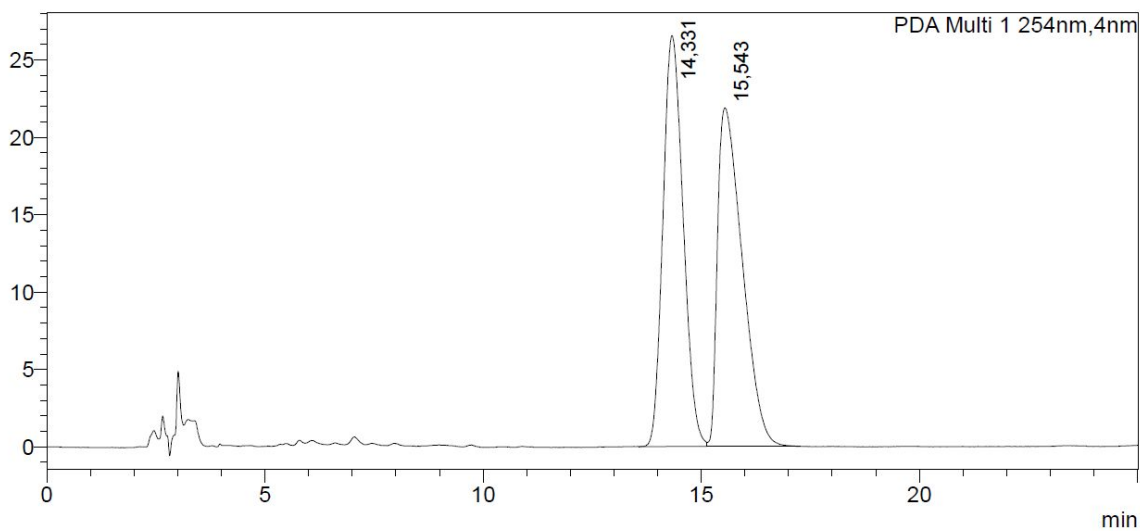

**<Peak Table>**

PDA Ch1 254nm

| Peak# | Ret. Time | Area%   | Area    | Height | Conc. |
|-------|-----------|---------|---------|--------|-------|
| 1     | 14,331    | 49,777  | 855845  | 26544  | 0,000 |
| 2     | 15,543    | 50,223  | 863516  | 21879  | 0,000 |
| Total |           | 100,000 | 1719360 | 48423  |       |

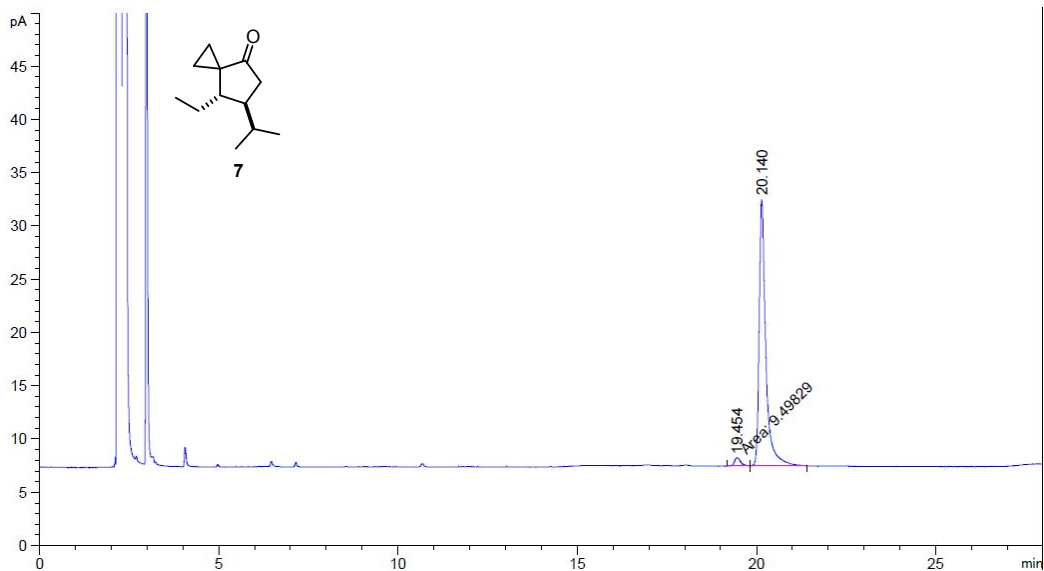

| Peak # | RetTime [min] | Type | Width [min] | Area [pA*s] | Height [pA] | Area %   |
|--------|---------------|------|-------------|-------------|-------------|----------|
| 1      | 19.454        | MM   | 0.1971      | 9.49829     | 8.03312e-1  | 2.85426  |
| 2      | 20.140        | BB   | 0.1587      | 323.27719   | 25.03071    | 97.14574 |

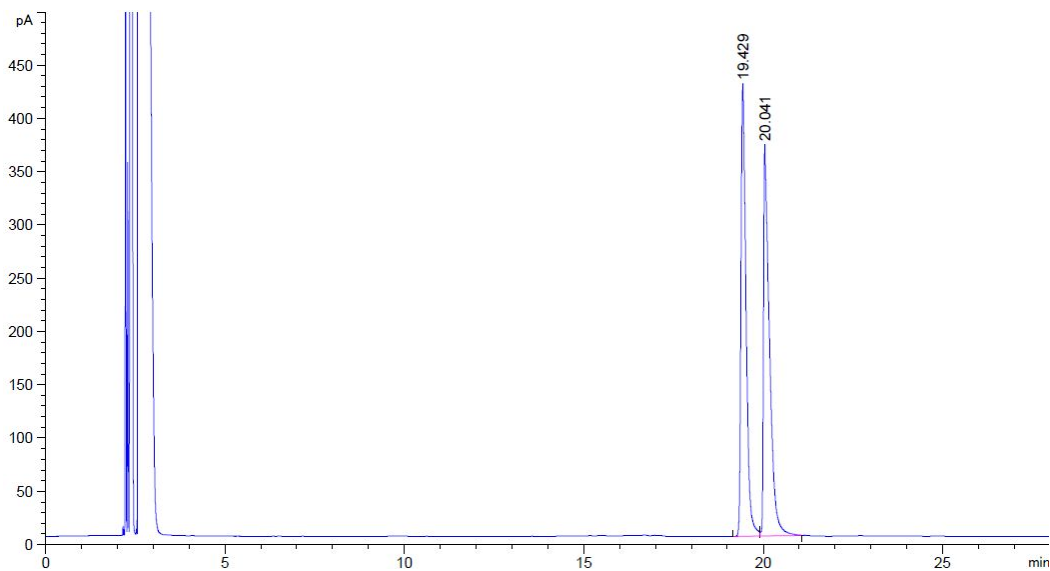

| Peak # | RetTime [min] | Type | Width [min] | Area [pA*s] | Height [pA] | Area %   |
|--------|---------------|------|-------------|-------------|-------------|----------|
| 1      | 19.429        | BV   | 0.1376      | 4173.50879  | 424.91177   | 49.62860 |
| 2      | 20.041        | VB   | 0.1496      | 4235.97461  | 367.15088   | 50.37140 |

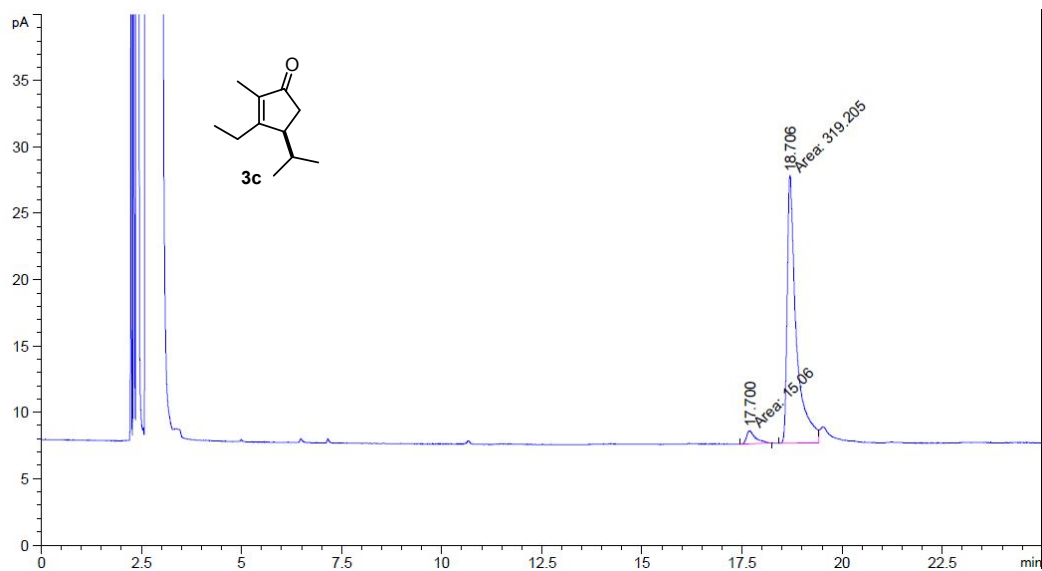

| Peak # | RetTime [min] | Type | Width [min] | Area [pA*s] | Height [pA] | Area %   |
|--------|---------------|------|-------------|-------------|-------------|----------|
| 1      | 17.700        | MM   | 0.2581      | 15.05998    | 9.72331e-1  | 4.50540  |
| 2      | 18.706        | MF   | 0.2636      | 319.20517   | 20.18125    | 95.49460 |

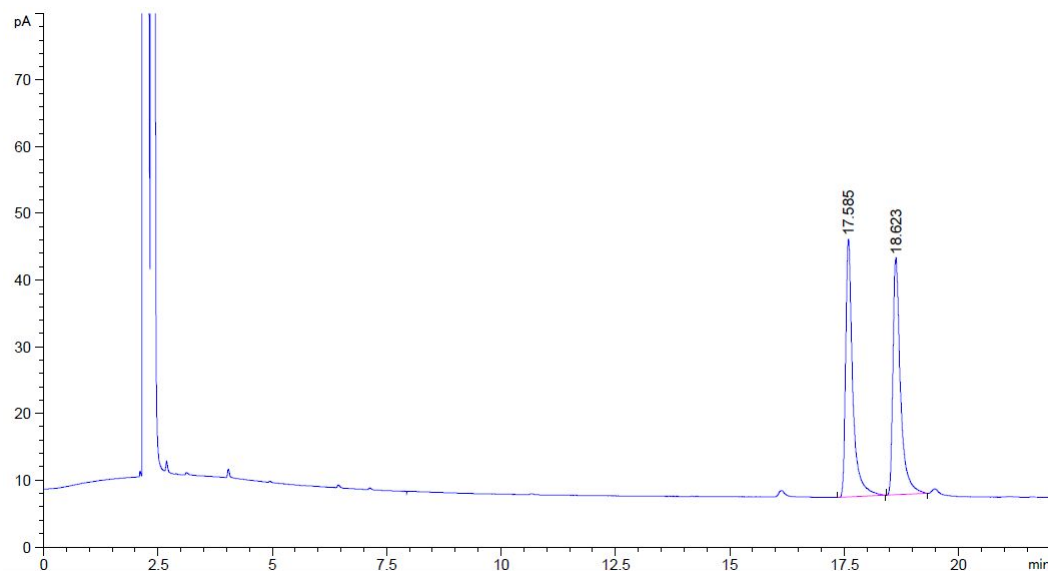

| Peak # | RetTime [min] | Type | Width [min] | Area [pA*s] | Height [pA] | Area %   |
|--------|---------------|------|-------------|-------------|-------------|----------|
| 1      | 17.585        | BB   | 0.1420      | 416.67603   | 38.59152    | 50.53559 |
| 2      | 18.623        | BB   | 0.1551      | 407.84387   | 35.49393    | 49.46441 |

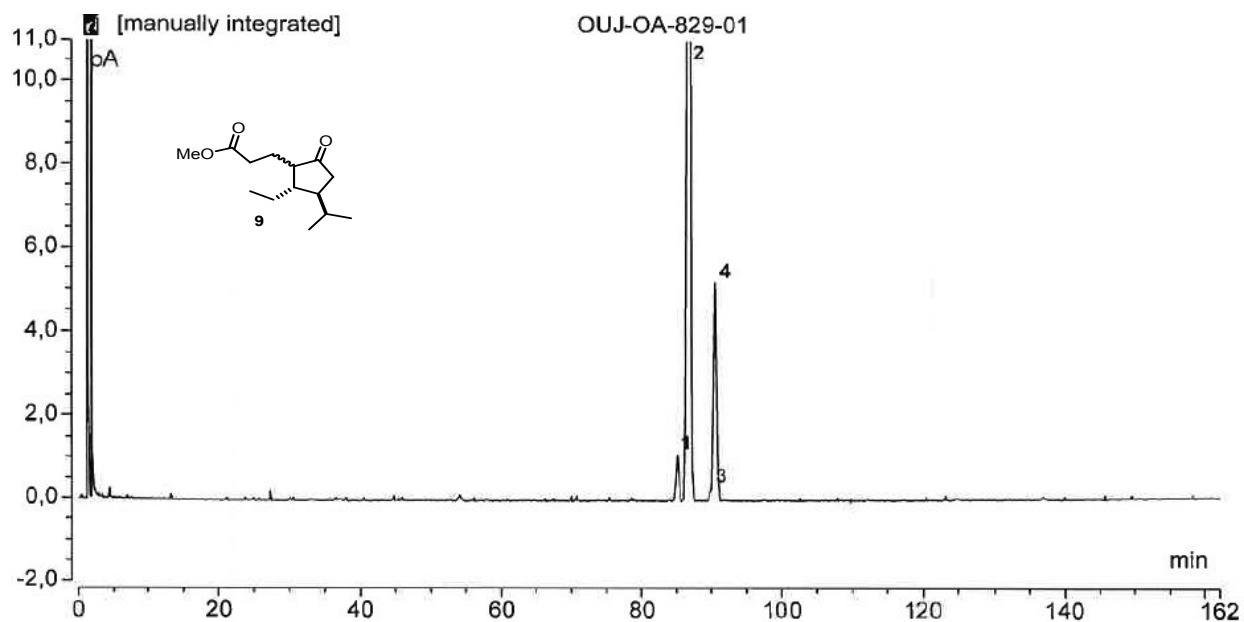

| No. | Ret.Time<br>min | area-%<br>% | Peak Name |
|-----|-----------------|-------------|-----------|
| 1   | 85,13           | 3,50        |           |
| 2   | 86,85           | 79,00       |           |
| 3   | 90,04           | 0,67        |           |
| 4   | 90,54           | 16,83       |           |

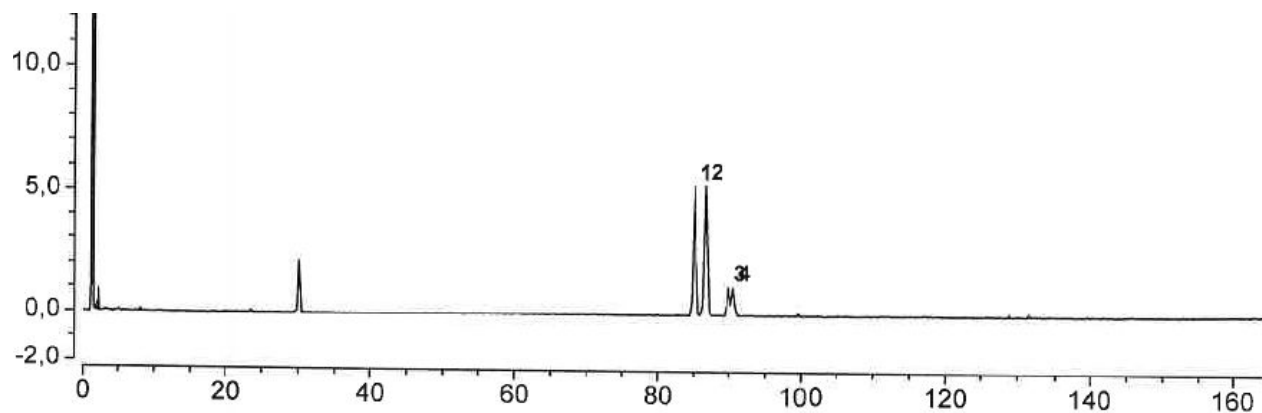

| No. | Ret.Time<br>min | area-%<br>% | Peak Name |
|-----|-----------------|-------------|-----------|
| 1   | 85,16           | 40,90       |           |
| 2   | 86,69           | 41,20       |           |
| 3   | 89,85           | 8,82        |           |
| 4   | 90,50           | 9,08        |           |

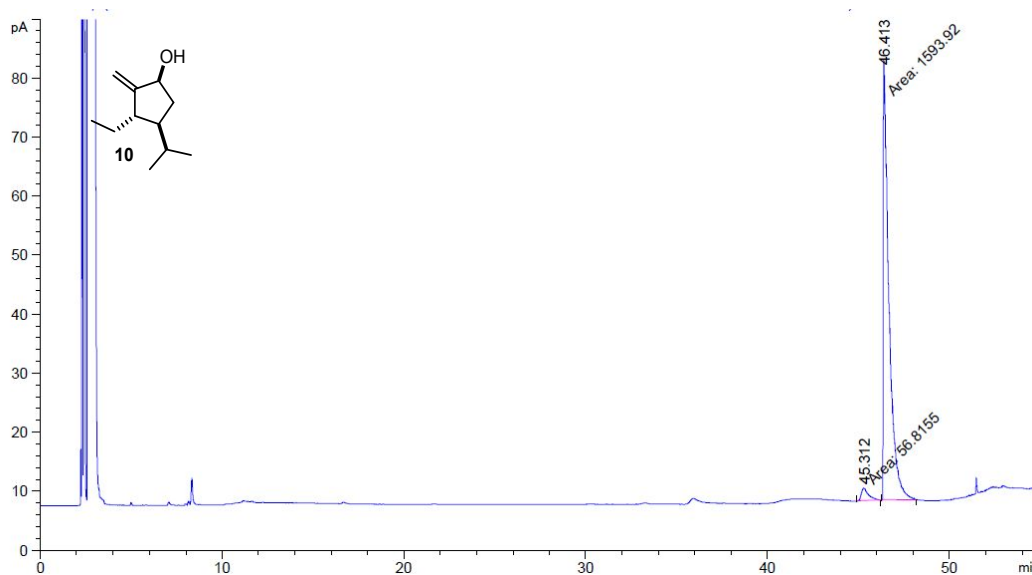

| Peak # | RetTime [min] | Type | Width [min] | Area [pA*s] | Height [pA] | Area %   |
|--------|---------------|------|-------------|-------------|-------------|----------|
| 1      | 45.312        | MM   | 0.4407      | 56.81547    | 2.14850     | 3.44183  |
| 2      | 46.413        | MM   | 0.3555      | 1593.91858  | 74.73600    | 96.55817 |

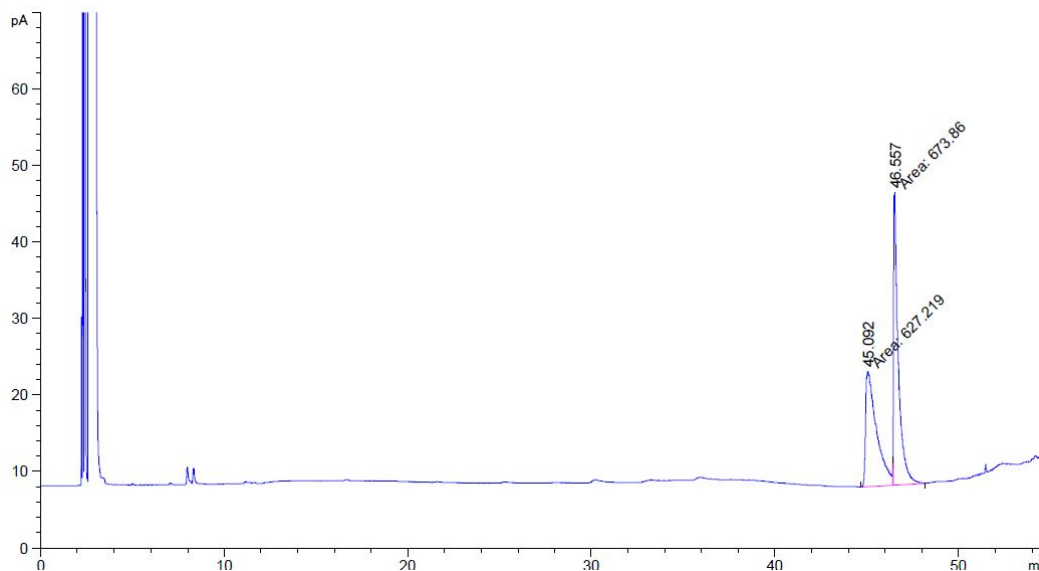

| Peak # | RetTime [min] | Type | Width [min] | Area [pA*s] | Height [pA] | Area %   |
|--------|---------------|------|-------------|-------------|-------------|----------|
| 1      | 45.092        | MF   | 0.6902      | 627.21881   | 15.14659    | 48.20759 |
| 2      | 46.557        | FM   | 0.2931      | 673.86011   | 38.32196    | 51.79241 |

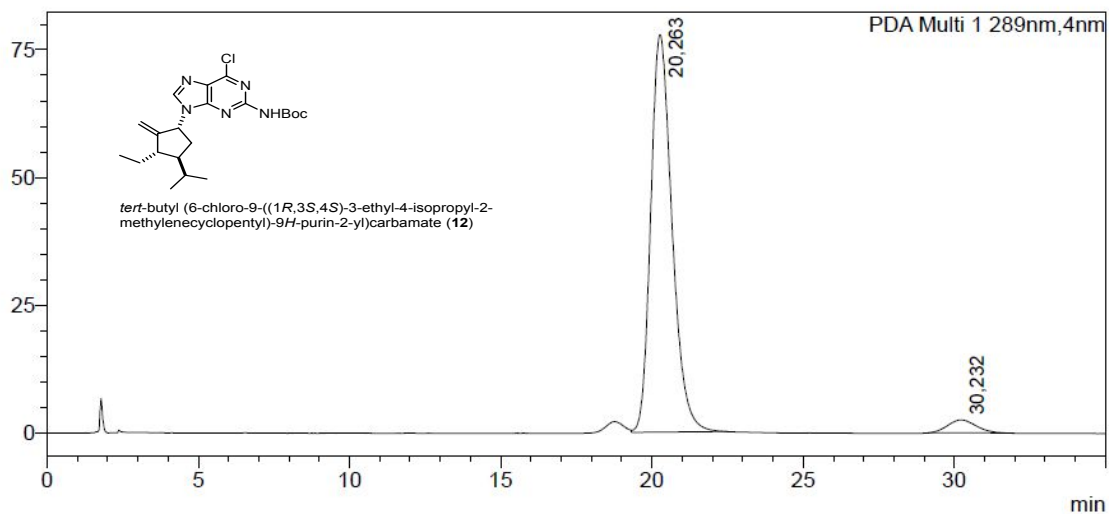

**<Peak Table>**

PDA Ch1 289nm

| Peak# | Ret. Time | Area%   | Area    | Height |
|-------|-----------|---------|---------|--------|
| 1     | 20,263    | 95,909  | 3817812 | 77811  |
| 2     | 30,232    | 4,091   | 162861  | 2510   |
| Total |           | 100,000 | 3980673 | 80321  |

mAU

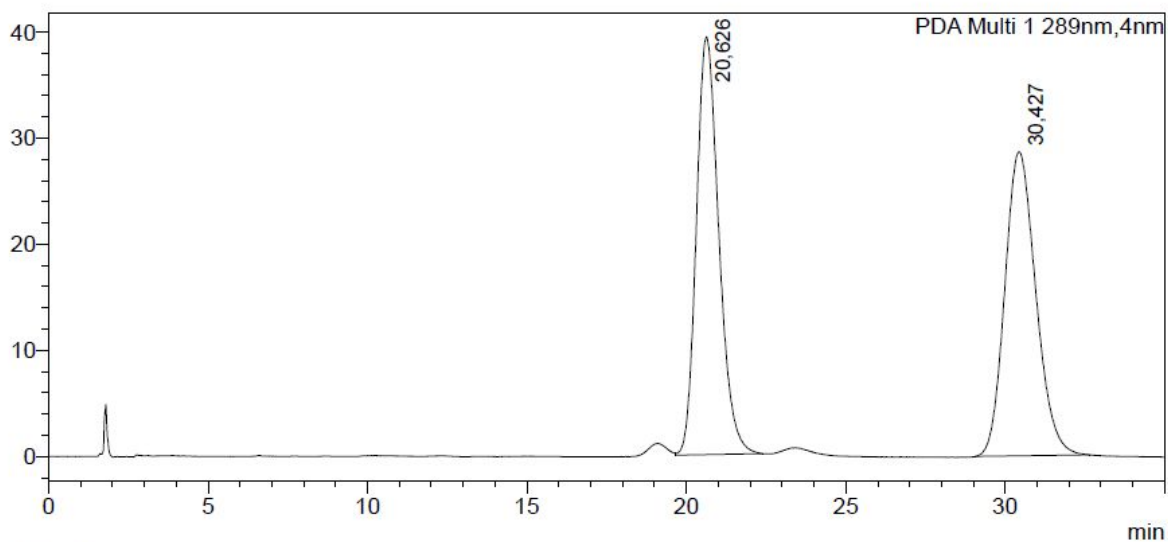

**<Peak Table>**

PDA Ch1 289nm

| Peak# | Ret. Time | Area%   | Area    | Height | Height% |
|-------|-----------|---------|---------|--------|---------|
| 1     | 20,626    | 49,910  | 1930931 | 39377  | 57,879  |
| 2     | 30,427    | 50,090  | 1937879 | 28656  | 42,121  |
| Total |           | 100,000 | 3868810 | 68033  | 100,000 |
